# Supplementary material for: Wide-Scale Analysis of Human Functional Transcription Factor Binding Reveals a Strong Bias towards the Transcription Start Site
Source: PLoS One. 2007 Aug 29;2(8):e807. doi: 10.1371/journal.pone.0000807 (PMC1950076; doi:10.1371/journal.pone.0000807)
Supplement: Table S2 — Full results for over-representation of binding sites. Comprehensive study of the appearances of 414 vertebrate BSs with known PSSMs [34] in the promoters of 8110 human and 23,400 mouse genes. We used groups of human genes that belong to 134 different functional GO classes G, to search for each one of 414 motifs M in twelve 100bp-long windows W in the interval [+200, −1000] bp with respect to the TSS. We examined windows of different sizes (200bp ,300bp, 400bp and 700bp), with and without overlap between the windows. In this paper we focous mainly on the analysis of the 100bp window since its gave us better location specificity and better control on the background GC content. In total, for the 100bp windows, 414×134×12 = 665,712 independent analyses were carried out, one for every (M,G,W) combination. The analysis was carried out for human and mouse, and the statistically significant (M,G,W) combinations are shown. Each row represents an (M,G) pair (first two columns) with a statistically significant over-representation score (passed FDR of 0.10-see text), in at least one location window in Human (grey with the letter H) or Mouse (grey with the letter M) or in both (black box). The BS symbol and its GC content are also given. (0.87 MB PDF) [file pone.0000807.s005.pdf]

# 100bp Window

| GO group                                         | Motifs    | motif GC content | 199 - 100 | 99 - TSS | -1 -- 100 | -101 -- -200 | -201 -- -300 | -301 -- -400 | -401 -- -500 | -501 -- -600 | -601 -- -700 | -701 -- -800 | -801 -- -900 | -901 -- -1000 | GO-classes       | Unique motifs |
|--------------------------------------------------|-----------|------------------|-----------|----------|-----------|--------------|--------------|--------------|--------------|--------------|--------------|--------------|--------------|---------------|------------------|---------------|
| transcription (930)                              | SP1.01    | 0.78             | H         | H        | 0         | H            |              |              |              |              |              |              |              | H             | transcription GO | 1             |
| regulation of transcription DNA dependent (1066) | SP1.01    | 0.78             | H         | H        | 0         | H            |              |              |              |              |              |              |              |               | transcription GO |               |
| regulation of transcription (266)                | SP1.01    | 0.78             | 0         | 0        | 0         | 0            | H            | 0            | H            | M            | 0            | 0            | 0            | 0             | transcription GO |               |
| transcription (930)                              | WT1.01    | 0.77             | H         | H        | H         |              |              |              |              |              | 0            | H            | H            |               | transcription GO | 2             |
| regulation of transcription DNA dependent (1066) | WT1.01    | 0.77             |           |          | 0         |              |              |              |              | H            | H            |              |              |               | transcription GO |               |
| development (530)                                | WT1.01    | 0.77             | 0         | 0        | 0         | H            |              | 0            | H            | H            | 0            | 0            | 0            | 0             | transcription GO |               |
| regulation of transcription (266)                | WT1.01    | 0.77             | H         | 0        | H         | H            |              | H            | H            | 0            | 0            | H            | 0            | 0             | transcription GO |               |
| regulation of transcription DNA dependent (1066) | HES1.02   | 0.76             | 0         | 0        | 0         | M            | H            | 0            | H            | H            | 0            | 0            | H            | 0             | transcription GO | 3             |
| transcription (930)                              | MAZR.01   | 0.76             | H         |          | H         | H            |              |              |              |              | 0            | H            | M            | H             | transcription GO | 4             |
| regulation of transcription DNA dependent (1066) | MAZR.01   | 0.76             | H         | H        | H         | H            |              |              |              | M            | H            |              |              | H             | transcription GO |               |
| development (530)                                | MAZR.01   | 0.76             | 0         | 0        | 0         | H            | H            |              | H            | M            | 0            | H            | 0            | 0             | transcription GO |               |
| regulation of transcription (266)                | MAZR.01   | 0.76             | 0         | H        | 0         | H            | 0            | 0            | H            | M            | 0            | 0            | M            | 0             | transcription GO |               |
| transcription (930)                              | ZNF202.01 | 0.73             | H         | H        | 0         | H            |              | H            |              | M            | H            |              | 0            | 0             | transcription GO | 5             |
| regulation of transcription DNA dependent (1066) | ZNF202.01 | 0.73             | H         | 0        | 0         | H            |              | H            |              | M            | H            |              | M            | H             | transcription GO |               |
| development (530)                                | ZNF202.01 | 0.73             | 0         | 0        | H         |              | H            | 0            | H            | 0            | 0            | 0            | 0            | 0             | transcription GO |               |
| transcription (930)                              | AP2.01    | 0.73             | H         | 0        | 0         | H            |              |              |              | H            | H            | H            | H            |               | transcription GO | 6             |
| regulation of transcription DNA dependent (1066) | AP2.01    | 0.73             | H         | 0        | 0         | M            |              |              |              | H            | H            | H            | H            |               | transcription GO |               |
| development (530)                                | AP2.01    | 0.73             | 0         | 0        | 0         | 0            |              | M            | H            | 0            | H            | 0            | H            | 0             | transcription GO |               |
| regulation of transcription (266)                | AP2.01    | 0.73             | 0         | 0        | 0         |              |              |              |              | 0            | H            | H            | H            | H             | transcription GO |               |
| transcription (930)                              | ZF5.01    | 0.72             | 0         | 0        | 0         | H            |              |              |              | H            | H            | H            | H            | H             | transcription GO | 7             |
| regulation of transcription DNA dependent (1066) | ZF5.01    | 0.72             | H         | 0        | 0         | H            |              |              |              | H            | H            | H            | H            |               | transcription GO |               |
| regulation of transcription (266)                | ZF5.01    | 0.72             | 0         | 0        | 0         | H            |              | 0            | H            | 0            | 0            | 0            | 0            | H             | transcription GO |               |
| transcription (930)                              | ZF9.01    | 0.72             | H         | H        | 0         | 0            | H            |              | H            | H            | H            |              | M            | H             | transcription GO | 8             |
| regulation of transcription DNA dependent (1066) | ZF9.01    | 0.72             | H         | H        | 0         | 0            | H            |              | H            | H            |              |              |              | H             | transcription GO |               |
| development (530)                                | ZF9.01    | 0.72             | 0         | 0        | 0         | 0            | 0            | M            | 0            | 0            | 0            | 0            | H            | 0             | transcription GO |               |
| regulation of transcription DNA dependent (1066) | EGR3.01   | 0.71             | H         | 0        | 0         | 0            | H            |              | H            | H            | 0            | 0            | M            | H             | transcription GO | 9             |
| regulation of transcription (266)                | EGR3.01   | 0.71             | 0         | 0        | 0         | 0            | 0            | 0            | 0            | 0            | H            | 0            | M            | 0             | transcription GO |               |
| transcription (930)                              | NRF1_01   | 0.71             | H         | H        | H         | H            |              |              |              | H            | H            | H            | H            | H             | transcription GO | 10            |
| regulation of transcription DNA dependent (1066) | NRF1_01   | 0.71             | H         | H        | H         |              |              |              |              | H            | H            | H            | H            | H             | transcription GO |               |
| transcription (930)                              | MYCMAX.03 | 0.7              | 0         | 0        | 0         |              | H            | H            | 0            | H            | 0            | H            | 0            | 0             | transcription GO | 11            |
| regulation of transcription DNA dependent (1066) | MYCMAX.03 | 0.7              | 0         | 0        | 0         |              | H            | 0            | H            | H            | 0            | H            | 0            | 0             | transcription GO |               |
| transcription (930)                              | ZBP89.01  | 0.7              | H         |          |           | 0            |              |              | H            | M            | 0            | 0            | H            | 0             | transcription GO | 12            |
| regulation of transcription DNA dependent (1066) | ZBP89.01  | 0.7              | H         |          |           |              |              |              | H            | M            | 0            | H            | 0            | 0             | transcription GO |               |
| development (530)                                | ZBP89.01  | 0.7              | 0         | 0        | H         |              | H            | 0            | H            | M            | 0            | H            | M            | 0             | transcription GO |               |
| transcription (930)                              | NGFIC.01  | 0.69             | H         | M        | 0         | 0            | H            | H            | H            | 0            | 0            | 0            | 0            | 0             | transcription GO | 13            |
| regulation of transcription DNA dependent (1066) | NGFIC.01  | 0.69             | H         | M        | 0         | 0            | H            | H            | H            | 0            | H            | 0            | 0            | 0             | transcription GO |               |
| transcription (930)                              | CKROX_01  | 0.68             | H         |          | M         | H            | H            |              | H            |              | 0            | H            | 0            | 0             | transcription GO | 14            |
| regulation of transcription DNA dependent (1066) | CKROX_01  | 0.68             | H         |          | M         |              |              |              |              | H            | H            |              | 0            |               | transcription GO |               |
| development (530)                                | CKROX_01  | 0.68             | 0         | 0        | 0         | 0            | H            | H            | H            | 0            | 0            | 0            | 0            | 0             | transcription GO |               |
| regulation of transcription (266)                | CKROX_01  | 0.68             | H         | 0        |           | H            | H            | H            | H            | M            | 0            | H            | 0            | 0             | transcription GO |               |
| transcription (930)                              | EGR1.02   | 0.68             | H         |          | H         | H            |              | H            |              |              | H            | H            | H            | H             | transcription GO | 15            |
| regulation of transcription DNA dependent (1066) | EGR1.02   | 0.68             | H         |          | 0         |              |              |              |              |              | H            |              |              |               | transcription GO |               |
| development (530)                                | EGR1.02   | 0.68             | 0         | 0        | 0         | 0            | H            | H            | 0            | 0            | 0            | 0            | 0            | M             | transcription GO |               |
| regulation of transcription (266)                | EGR1.02   | 0.68             | H         | 0        | 0         |              |              | H            | H            | 0            | 0            | 0            | 0            | H             | transcription GO |               |
| regulation of transcription DNA dependent (1066) | BKLF.01   | 0.68             | 0         | 0        | 0         | 0            | 0            | 0            | H            | 0            | 0            | 0            | M            | 0             | transcription GO | 16            |
| transcription (930)                              | GC.01     | 0.68             | 0         | 0        | 0         | 0            | H            | H            |              | M            | 0            | 0            | 0            | 0             | transcription GO | 17            |
| regulation of transcription DNA dependent (1066) | GC.01     | 0.68             | H         | 0        | 0         | 0            | H            | H            | H            | M            | 0            | 0            | M            | 0             | transcription GO |               |
| development (530)                                | MZF1.01   | 0.68             | 0         | 0        | H         | H            | 0            | H            | M            | 0            | H            | 0            | 0            | 0             | transcription GO | 18            |
| regulation of transcription DNA dependent (1066) | EGR1.01   | 0.67             | H         | 0        | 0         | H            |              | 0            | H            | M            | H            | 0            | H            | H             | transcription GO | 19            |
| regulation of transcription DNA dependent (1066) | MTF-1.01  | 0.65             | 0         | 0        | 0         | H            | 0            |              | 0            | M            | 0            | H            | 0            | 0             | transcription GO | 20            |
| transcription (930)                              | MAZ.01    | 0.65             | H         | 0        | 0         | H            |              | H            |              |              | H            | H            | H            | H             | transcription GO | 21            |

|                                                    |               |      |   |   |   |   |   |   |   |   |   |   |                  |
|----------------------------------------------------|---------------|------|---|---|---|---|---|---|---|---|---|---|------------------|
| regulation of transcription DNA dependent (1066)   | MAZ.01        | 0.65 | H | H | 0 | H |   |   |   |   | H | H | transcription GO |
| development (530)                                  | MAZ.01        | 0.65 | 0 | 0 | 0 | H | 0 | H | M | 0 | H | 0 | transcription GO |
| regulation of transcription (266)                  | MAZ.01        | 0.65 | 0 | 0 | 0 | H | H |   | H | M | 0 | 0 | transcription GO |
| transcription (930)                                | ZIC2_01       | 0.65 | H | 0 | 0 | 0 | H | M | 0 | 0 | 0 | M | transcription GO |
| regulation of transcription DNA dependent (1066)   | ZIC2_01       | 0.65 | H | 0 | 0 | 0 | H | 0 | 0 | 0 | M | 0 | transcription GO |
| regulation of transcription DNA dependent (1066)   | ATF6.01       | 0.64 | 0 | 0 | 0 | M | 0 | M | 0 | 0 | H | 0 | transcription GO |
| transcription (930)                                | PLAG1_01      | 0.63 | H | 0 | H | H | 0 | H |   | M | H | H | transcription GO |
| regulation of transcription DNA dependent (1066)   | PLAG1_01      | 0.63 | H | M | H | H | H |   |   |   | H | H | transcription GO |
| development (530)                                  | PLAG1_01      | 0.63 | 0 | M | H | H | H | H | H | 0 | H | 0 | transcription GO |
| regulation of transcription (266)                  | PLAG1_01      | 0.63 | 0 | H | H | H | 0 | 0 | M | 0 | 0 | 0 | transcription GO |
| transcription (930)                                | AHRARNT.02    | 0.62 | 0 | 0 | 0 | 0 | 0 | H | 0 | 0 | 0 | 0 | transcription GO |
| regulation of transcription DNA dependent (1066)   | AHRARNT.02    | 0.62 | 0 | 0 | 0 | 0 | 0 | H | 0 | 0 | H | 0 | transcription GO |
| regulation of transcription DNA dependent (1066)   | HES1.01       | 0.62 | 0 | 0 | 0 | M | H | H |   | 0 | 0 | H | transcription GO |
| regulation of transcription DNA dependent (1066)   | MUSCLE_INI.02 | 0.62 | 0 | 0 | 0 | H |   | H | 0 | H | 0 | 0 | transcription GO |
| regulation of transcription DNA dependent (1066)   | MUSCLE_INI.01 | 0.61 | 0 | 0 | 0 | H | H | M | 0 | H | 0 | 0 | transcription GO |
| regulation of transcription DNA dependent (1066)   | ZNF76_143_01  | 0.6  | 0 | 0 | 0 | 0 | 0 | 0 | M | H | H | 0 | transcription GO |
| transcription (930)                                | CDE.01        | 0.6  | M | H | H | H | H | H | H | H | 0 | H | transcription GO |
| regulation of transcription DNA dependent (1066)   | CDE.01        | 0.6  | 0 | H | 0 | H |   | H |   |   | H | H | transcription GO |
| regulation of transcription DNA dependent (1066)   | ZBRK1_01      | 0.59 | 0 | 0 | 0 | 0 | 0 | M | 0 | 0 | 0 | 0 | transcription GO |
| transcription (930)                                | E2F.02        | 0.59 | 0 | H | H | H | 0 | 0 | H | H |   | 0 | transcription GO |
| regulation of transcription DNA dependent (1066)   | E2F.02        | 0.59 | 0 | 0 | 0 | H | 0 | 0 | H | H |   | 0 | transcription GO |
| transcription (930)                                | TAXCREB.01    | 0.58 | 0 | 0 | 0 | 0 | 0 | H | M | 0 | 0 | M | transcription GO |
| development (530)                                  | PAX5.01       | 0.57 | 0 | 0 | 0 | 0 | 0 | 0 | 0 | H | 0 | M | transcription GO |
| regulation of transcription DNA dependent (1066)   | GAGA.01       | 0.56 |   | 0 | H | 0 | H | H | H | M | 0 | M | transcription GO |
| development (530)                                  | GAGA.01       | 0.56 | 0 | 0 | H | H | H |   | H | 0 | 0 | 0 | transcription GO |
| transcription (930)                                | E2F.03        | 0.54 | 0 | H | H | H | 0 | H | 0 | M | 0 | 0 | transcription GO |
| regulation of transcription DNA dependent (1066)   | E2F.03        | 0.54 | 0 | H | H | H | 0 | H | 0 | M | 0 | 0 | transcription GO |
| development (530)                                  | GKLF.01       | 0.49 | 0 |   | 0 | 0 | H | H | 0 | 0 | 0 | 0 | transcription GO |
| regulation of transcription DNA dependent (1066)   | CAAT.01       | 0.49 | 0 | 0 | H | H |   | 0 | 0 | 0 | 0 | 0 | transcription GO |
| development (530)                                  | MTATA.01      | 0.47 | 0 | 0 |   | 0 | 0 | 0 | 0 | 0 | 0 | 0 | transcription GO |
| protein amino acid phosphorylation (373)           | SP1.01        | 0.78 | 0 | 0 | H | 0 | 0 | H | M | H | 0 | H | general GO       |
| transcription RNA polyl promoter (190)             | SP1.01        | 0.78 | 0 | 0 | 0 | 0 | 0 | H | 0 | 0 | 0 | M | general GO       |
| small GTPase mediated signal transduction (124)    | SP1.01        | 0.78 | H |   | H | H | H | H | H | 0 | 0 | 0 | general GO       |
| intracellular protein transport (191)              | SP1.01        | 0.78 | H | M | H | H | 0 | 0 | 0 | 0 | 0 | 0 | general GO       |
| regulation of transcription from RNA polymerase II | SP1.01        | 0.78 | H | 0 | 0 | 0 | 0 | 0 | 0 | 0 | 0 | 0 | general GO       |
| transcription RNA polyl promoter (190)             | WT1.01        | 0.77 | 0 | 0 | 0 | H | M | H | 0 | 0 | 0 | 0 | general GO       |
| regulation of transcription from RNA polymerase II | MAZR.01       | 0.76 | M | 0 | H | H | 0 | H | 0 | M | 0 | 0 | general GO       |
| Wnt receptor signaling pathway (66)                | AP2.01        | 0.73 | H | 0 | 0 | H | H | 0 | 0 | M | 0 | 0 | general GO       |
| small GTPase mediated signal transduction (124)    | ZF5.01        | 0.72 | 0 | M | H | H | 0 | 0 | 0 | 0 | 0 | 0 | general GO       |
| transcription RNA polyl promoter (190)             | NRF1_01       | 0.71 | 0 | 0 | 0 |   | 0 | 0 | 0 | 0 | 0 | 0 | general GO       |
| intracellular protein transport (191)              | NRF1_01       | 0.71 | 0 | 0 |   | H |   |   |   |   |   |   |                  |

[illegible]

[illegible]

[illegible]



|                                                  |                |      |   |   |   |   |   |   |   |                  |
|--------------------------------------------------|----------------|------|---|---|---|---|---|---|---|------------------|
| development (530)                                | ZNF202.01      | 0.73 | 0 |   |   | H | H | M |   | transcription GO |
| transcription (930)                              | AP2.01         | 0.73 | 0 | H |   |   |   |   |   | transcription GO |
| regulation_of_transcription_DNA_dependent (1066) | AP2.01         | 0.73 | M | 0 |   |   |   |   |   | transcription GO |
| regulation_of_transcription (266)                | AP2.01         | 0.73 | 0 | 0 |   | M | H | H |   | transcription GO |
| development (530)                                | AP2.01         | 0.73 | 0 | 0 |   | H | H | H |   | transcription GO |
| transcription (930)                              | ZF5.01         | 0.72 | 0 | 0 |   | H | H |   |   | transcription GO |
| regulation_of_transcription_DNA_dependent (1066) | ZF5.01         | 0.72 |   | M |   |   |   | H |   | transcription GO |
| regulation_of_transcription (266)                | ZF5.01         | 0.72 | 0 | H |   | 0 | H | 0 |   | transcription GO |
| transcription (930)                              | ZF9.01         | 0.72 | 0 | 0 |   |   | M |   |   | transcription GO |
| regulation_of_transcription_DNA_dependent (1066) | ZF9.01         | 0.72 | 0 | 0 |   |   |   |   |   | transcription GO |
| transcription (930)                              | EGR3.01        | 0.71 | 0 | 0 | M |   | 0 | H |   | transcription GO |
| regulation_of_transcription_DNA_dependent (1066) | EGR3.01        | 0.71 | 0 | 0 | M |   | 0 |   |   | transcription GO |
| transcription (930)                              | NRF1_01        | 0.71 | H | 0 |   |   |   |   |   | transcription GO |
| regulation_of_transcription_DNA_dependent (1066) | NRF1_01        | 0.71 | H | 0 |   |   |   | H |   | transcription GO |
| regulation_of_transcription_DNA_dependent (1066) | MYCMAX.03      | 0.7  | 0 | 0 |   | H | 0 | 0 |   | transcription GO |
| transcription (930)                              | ZBP89.01       | 0.7  | H |   |   | M | M | 0 |   | transcription GO |
| regulation_of_transcription_DNA_dependent (1066) | ZBP89.01       | 0.7  | H | M |   | M |   | M |   | transcription GO |
| regulation_of_transcription (266)                | ZBP89.01       | 0.7  | M | M |   |   | 0 | 0 |   | transcription GO |
| development (530)                                | ZBP89.01       | 0.7  | 0 | H |   |   |   | H |   | transcription GO |
| regulation_of_transcription_DNA_dependent (1066) | HELT.01        | 0.69 | 0 | 0 | H | H |   | 0 |   | transcription GO |
| regulation_of_transcription_DNA_dependent (1066) | NGFIC.01       | 0.69 | 0 | 0 | M | H | H |   |   | transcription GO |
| transcription (930)                              | CKROX_01       | 0.68 |   |   |   |   | 0 | 0 |   | transcription GO |
| regulation_of_transcription_DNA_dependent (1066) | CKROX_01       | 0.68 |   |   |   |   | M |   |   | transcription GO |
| regulation_of_transcription (266)                | CKROX_01       | 0.68 | 0 | M |   |   | 0 | 0 |   | transcription GO |
| development (530)                                | CKROX_01       | 0.68 | 0 | H |   |   | H | 0 |   | transcription GO |
| transcription (930)                              | EGR1.02        | 0.68 |   |   |   |   |   |   |   | transcription GO |
| regulation_of_transcription_DNA_dependent (1066) | EGR1.02        | 0.68 |   | M |   |   |   |   |   | transcription GO |
| regulation_of_transcription_DNA_dependent (1066) | HIC1_01        | 0.68 | 0 | 0 | 0 | 0 | H |   |   | transcription GO |
| transcription (930)                              | BKLF.01        | 0.68 | 0 | 0 | 0 | 0 | 0 | 0 |   | transcription GO |
| regulation_of_transcription_DNA_dependent (1066) | BKLF.01        | 0.68 | 0 | 0 | 0 | 0 | 0 |   |   | transcription GO |
| transcription (930)                              | GC.01          | 0.68 | 0 | 0 |   |   | 0 | 0 |   | transcription GO |
| regulation_of_transcription_DNA_dependent (1066) | GC.01          | 0.68 | 0 | 0 |   |   | 0 | M |   | transcription GO |
| development (530)                                | MZF1.01        | 0.68 | 0 | H | H |   | H | H |   | transcription GO |
| regulation_of_transcription_DNA_dependent (1066) | EGR1.01        | 0.67 | H | 0 | M | 0 | H |   |   | transcription GO |
| regulation_of_transcription_DNA_dependent (1066) | TIEG.01        | 0.66 | 0 | 0 | H | 0 | 0 |   |   | transcription GO |
| transcription (930)                              | MAZ.01         | 0.65 | 0 | 0 |   | M |   | H |   | transcription GO |
| regulation_of_transcription_DNA_dependent (1066) | MAZ.01         | 0.65 | 0 | 0 |   | M |   |   |   | transcription GO |
| regulation_of_transcription (266)                | MAZ.01         | 0.65 | 0 | 0 |   |   | H | 0 |   | transcription GO |
| development (530)                                | MAZ.01         | 0.65 | 0 | H | H |   |   | H |   | transcription GO |
| development (530)                                | ZIC2_01        | 0.65 | 0 | 0 | H | 0 | 0 |   |   | transcription GO |
| transcription (930)                              | PLAG1_01       | 0.63 | M | H | M |   | H | H |   | transcription GO |
| regulation_of_transcription_DNA_dependent (1066) | PLAG1_01       | 0.63 | M | H | M |   |   |   |   | transcription GO |
| regulation_of_transcription (266)                | PLAG1_01       | 0.63 | M | 0 | H |   | 0 | 0 |   | transcription GO |
| development (530)                                | PLAG1_01       | 0.63 | 0 | H |   | H | H | 0 |   | transcription GO |
| transcription (930)                              | HES1.01        | 0.62 | 0 | M | M |   | H | H |   | transcription GO |
| regulation_of_transcription_DNA_dependent (1066) | HES1.01        | 0.62 | 0 | M |   |   | H |   |   | transcription GO |
| transcription (930)                              | MUSCLE_INI.02  | 0.62 | 0 | 0 |   | H | 0 | 0 |   | transcription GO |
| regulation_of_transcription_DNA_dependent (1066) | MUSCLE_INI.02  | 0.62 | 0 | 0 |   | H | 0 | M |   | transcription GO |
| transcription (930)                              | CDE.01         | 0.6  | H |   | M |   | M | H |   | transcription GO |
| regulation_of_transcription_DNA_dependent (1066) | CDE.01         | 0.6  | H | M | M |   |   |   |   | transcription GO |
| development (530)                                | CDE.01         | 0.6  | 0 | 0 | 0 | H | 0 |   |   | transcription GO |
| transcription (930)                              | E2F.02         | 0.59 | 0 | H | 0 | 0 |   | M |   | transcription GO |
| regulation_of_transcription_DNA_dependent (1066) | E2F.02         | 0.59 | 0 | H | 0 | 0 |   | M |   | transcription GO |
| development (530)                                | PAX5.01        | 0.57 | 0 | 0 | 0 | 0 | 0 |   |   | transcription GO |
| regulation_of_transcription (266)                | VDR_RXR.02     | 0.56 | 0 | 0 | 0 |   | 0 | 0 |   | transcription GO |
| transcription (930)                              | GAGA.01        | 0.56 |   | 0 | M |   | 0 | H |   | transcription GO |
| regulation_of_transcription_DNA_dependent (1066) | GAGA.01        | 0.56 |   | H | H |   | 0 | H |   | transcription GO |
| regulation_of_transcription (266)                | GAGA.01        | 0.56 | H |   | H |   | 0 | 0 |   | transcription GO |
| development (530)                                | GAGA.01        | 0.56 | M |   | H | H | H | H |   | transcription GO |
| regulation_of_transcription_DNA_dependent (1066) | E2F.03         | 0.54 | 0 | 0 | 0 | 0 | M |   |   | transcription GO |
| regulation_of_transcription_DNA_dependent (1066) | NFY.01         | 0.52 | 0 | H |   |   | 0 | 0 | 0 | transcription GO |
| regulation_of_transcription_DNA_dependent (1066) | AG_rich_coding | 0.5  | M |   | H |   | 0 | 0 |   | transcription GO |
| regulation_of_transcription (266)                | AG_rich_coding | 0.5  | M |   | H |   | H | 0 |   | transcription GO |
| development (530)                                | AG_rich_coding | 0.5  |   |   | H | H | 0 | 0 |   | transcription GO |

|                                                        |               |      |   |   |   |   |   |   |                  |
|--------------------------------------------------------|---------------|------|---|---|---|---|---|---|------------------|
| development (530)                                      | MTATA.01      | 0.47 | 0 | 0 | 0 | 0 | 0 | 0 | transcription GO |
| regulation_of_transcription (266)                      | LMX1B.01      | 0.32 | 0 | 0 | 0 | 0 | 0 | 0 | transcription GO |
| development (530)                                      | TATA.01       | 0.28 | 0 | 0 | 0 | 0 | 0 | 0 | transcription GO |
| small_GTPase_mediated_signal_transduction (124)        | SP1.01        | 0.78 | H | 0 | 0 | 0 | 0 | 0 | general GO       |
| protein_transport (254)                                | SP1.01        | 0.78 | H | 0 | 0 | 0 | 0 | 0 | general GO       |
| intracellular_protein_transport (191)                  | SP1.01        | 0.78 | H | 0 | 0 | 0 | 0 | 0 | general GO       |
| Wnt_receptor_signaling_pathway (66)                    | WT1.01        | 0.77 | 0 | 0 | 0 | H | 0 | 0 | general GO       |
| small_GTPase_mediated_signal_transduction (124)        | WT1.01        | 0.77 | H | H | 0 | 0 | 0 | 0 | general GO       |
| cation_transport (99)                                  | ZNF202.01     | 0.73 | 0 | 0 | 0 | 0 | 0 | 0 | general GO       |
| small_GTPase_mediated_signal_transduction (124)        | ZF9.01        | 0.72 | H | 0 | 0 | 0 | 0 | 0 | general GO       |
| protein_transport (254)                                | ZF9.01        | 0.72 | H | 0 | 0 | 0 | 0 | 0 | general GO       |
| intracellular_protein_transport (191)                  | ZF9.01        | 0.72 | H | 0 | 0 | 0 | 0 | 0 | general GO       |
| chromatin_modification (53)                            | CKROX_01      | 0.68 | 0 | H | 0 | 0 | 0 | 0 | general GO       |
| small_GTPase_mediated_signal_transduction (124)        | EGR1.02       | 0.68 | 0 | 0 | 0 | 0 | 0 | 0 | general GO       |
| protein_transport (254)                                | EGR1.02       | 0.68 | H | 0 | 0 | 0 | 0 | 0 | general GO       |
| intracellular_protein_transport (191)                  | EGR1.02       | 0.68 | H | 0 | 0 | 0 | 0 | 0 | general GO       |
| muscle_development (107)                               | INSM1_01      | 0.63 | 0 | 0 | 0 | 0 | 0 | 0 | general GO       |
| protein_biosynthesis (197)                             | GABP.01       | 0.62 | H | 0 | 0 | 0 | 0 | 0 | general GO       |
| protein_complex_assembly (94)                          | P53.01        | 0.61 | 0 | 0 | 0 | 0 | 0 | 0 | general GO       |
| inflammatory_response (163)                            | NFKAPPAB.01   | 0.6  | 0 | 0 | 0 | 0 | 0 | 0 | general GO       |
| immune_response (366)                                  | NFKAPPAB.01   | 0.6  | 0 | 0 | 0 | 0 | 0 | 0 | general GO       |
| chemotaxis (98)                                        | NFKAPPAB.01   | 0.6  | 0 | 0 | 0 | 0 | 0 | 0 | general GO       |
| transcription_RNA_polyII_promoter (190)                | CDE.01        | 0.6  | 0 | 0 | 0 | 0 | 0 | 0 | general GO       |
| response_to_DNA_damage_stimulus (117)                  | E2F.02        | 0.59 | 0 | M | 0 | 0 | 0 | 0 | general GO       |
| DNA_repair (148)                                       | E2F.02        | 0.59 | H | M | 0 | 0 | 0 | 0 | general GO       |
| protein_transport (254)                                | WHN.01        | 0.59 | 0 | 0 | 0 | 0 | 0 | 0 | general GO       |
| protein_biosynthesis (197)                             | WHN.01        | 0.59 | 0 | 0 | 0 | 0 | 0 | 0 | general GO       |
| cell_division (103)                                    | WHN.01        | 0.59 | 0 | 0 | 0 | 0 | 0 | 0 | general GO       |
| cell_cycle (273)                                       | WHN.01        | 0.59 | 0 | H | 0 | 0 | 0 | 0 | general GO       |
| RNA_splicing (61)                                      | NRF2.01       | 0.57 | H | 0 | 0 | 0 | 0 | 0 | general GO       |
| protein_transport (254)                                | NRF2.01       | 0.57 | 0 | 0 | 0 | 0 | 0 | 0 | general GO       |
| protein_biosynthesis (197)                             | NRF2.01       | 0.57 | 0 | 0 | 0 | 0 | 0 | 0 | general GO       |
| sensory_perception (201)                               | NFKAPPAB.02   | 0.57 | 0 | 0 | 0 | 0 | 0 | 0 | general GO       |
| inflammatory_response (163)                            | NFKAPPAB.02   | 0.57 | 0 | 0 | 0 | 0 | 0 | 0 | general GO       |
| immune_response (366)                                  | NFKAPPAB.02   | 0.57 | 0 | 0 | 0 | 0 | 0 | 0 | general GO       |
| chemotaxis (98)                                        | NFKAPPAB.02   | 0.57 | 0 | 0 | 0 | 0 | 0 | 0 | general GO       |
| muscle_contraction (78)                                | MYOD.02       | 0.56 | 0 | 0 | 0 | 0 | 0 | 0 | general GO       |
| inflammatory_response (163)                            | NFKAPPAB65.01 | 0.55 | 0 | 0 | 0 | 0 | 0 | 0 | general GO       |
| immune_response (366)                                  | NFKAPPAB65.01 | 0.55 | 0 | 0 | 0 | 0 | 0 | 0 | general GO       |
| chemotaxis (98)                                        | NFKAPPAB65.01 | 0.55 | 0 | 0 | 0 | 0 | 0 | 0 | general GO       |
| cell_surface_receptor_linked_signal_transduction (169) | NFKAPPAB65.01 | 0.55 | 0 | 0 | 0 | 0 | 0 | 0 | general GO       |
| cell_cell_signaling (268)                              | NFKAPPAB65.01 | 0.55 | 0 | 0 | 0 | 0 | 0 | 0 | general GO       |
| apoptosis (258)                                        | NFKAPPAB65.01 | 0.55 | 0 | H | 0 | 0 | 0 | 0 | general GO       |
| protein_biosynthesis (197)                             | CETS1P54.01   | 0.55 | 0 | 0 | 0 | 0 | 0 | 0 | general GO       |
| protein_biosynthesis (197)                             | YY1.01        | 0.55 | 0 | 0 | 0 | 0 | 0 | 0 | general GO       |
| inflammatory_response (163)                            | CREL.01       | 0.55 | 0 | 0 | 0 | 0 | 0 | 0 | general GO       |
| immune_response (366)                                  | CREL.01       | 0.55 | 0 | 0 | 0 | 0 | 0 | 0 | general GO       |
| chemotaxis (98)                                        | CREL.01       | 0.55 | 0 | 0 | 0 | 0 | 0 | 0 | general GO       |
| cell_cell_signaling (268)                              | CREL.01       | 0.55 | 0 | 0 | 0 | 0 | 0 | 0 | general GO       |
| protein_biosynthesis (197)                             | ELK1.02       | 0.55 | H | 0 | 0 | 0 | 0 | 0 | general GO       |
| response_to_virus (55)                                 | NFKAPPAB.03   | 0.55 | 0 | 0 | 0 | 0 | 0 | 0 | general GO       |
| inflammatory_response (163)                            | NFKAPPAB.03   | 0.55 | 0 | 0 | 0 | 0 | 0 | 0 | general GO       |
| immune_response (366)                                  | NFKAPPAB.03   | 0.55 | 0 | 0 | 0 | 0 | 0 | 0 | general GO       |
| chemotaxis (98)                                        | NFKAPPAB.03   | 0.55 | 0 | 0 | 0 | 0 | 0 | 0 | general GO       |
| cellular_defense_response (68)                         | NFKAPPAB.03   | 0.55 | 0 | 0 | 0 | 0 | 0 | 0 | general GO       |
| cell_cell_signaling (268)                              | NFKAPPAB.03   | 0.55 | 0 | 0 | 0 | H | 0 | 0 | general GO       |
| response_to_DNA_damage_stimulus (117)                  | FLI.01        | 0.53 | 0 | 0 | 0 | 0 | 0 | 0 | general GO       |
| protein_biosynthesis (197)                             | FLI.01        | 0.53 | H | 0 | 0 | 0 | 0 | 0 | general GO       |
| DNA_repair (148)                                       | FLI.01        | 0.53 | 0 | 0 | 0 | 0 | 0 | 0 | general GO       |
| G_protein_coupled_receptor_protein_signaling_pathway   | NF1.01        | 0.53 | 0 | 0 | 0 | 0 | 0 | 0 | general GO       |
| metabolism (241)                                       | HNF4.01       | 0.53 | 0 | 0 | 0 | 0 | 0 | 0 | general GO       |
| electron_transport (214)                               | HNF4.01       | 0.53 | 0 | 0 | 0 | 0 | 0 | 0 | general GO       |
| inflammatory_response (163)                            | HIVEP1_01     | 0.52 | M | 0 | 0 | 0 | 0 | 0 | general GO       |
| immune_response (366)                                  | HIVEP1_01     | 0.52 | 0 | 0 | 0 | 0 | 0 | 0 | general GO       |

|                                                        |                |      |   |   |   |   |   |   |            |
|--------------------------------------------------------|----------------|------|---|---|---|---|---|---|------------|
| chemotaxis (98)                                        | HIVEP1_01      | 0.52 | 0 |   | 0 | 0 | 0 | 0 | general GO |
| cell_cell_signaling (268)                              | HIVEP1_01      | 0.52 | 0 |   | 0 | 0 | 0 | 0 | general GO |
| immune_response (366)                                  | AML1.01        | 0.52 | 0 |   | 0 | 0 | 0 | 0 | general GO |
| small_GTPase_mediated_signal_transduction (124)        | ERR_01         | 0.52 | 0 | 0 |   | 0 | 0 | 0 | general GO |
| steroid_biosynthesis (42)                              | NFY.01         | 0.52 | 0 |   | 0 | 0 | 0 | 0 | general GO |
| mitosis (86)                                           | NFY.01         | 0.52 | 0 |   | 0 | 0 | 0 | 0 | general GO |
| cell_division (103)                                    | NFY.01         | 0.52 | 0 | H |   | 0 | 0 | 0 | general GO |
| cell_cycle (273)                                       | NFY.01         | 0.52 | 0 | H |   | 0 | 0 | 0 | general GO |
| immune_response (366)                                  | ETS1.01        | 0.52 | 0 |   | 0 | 0 | 0 | 0 | general GO |
| cellular_defense_response (68)                         | ETS1.01        | 0.52 | 0 |   | 0 | 0 | 0 | 0 | general GO |
| protein_biosynthesis (197)                             | ELK1.01        | 0.52 | H |   | 0 | 0 | 0 | 0 | general GO |
| immune_response (366)                                  | AML3.01        | 0.5  | H |   | 0 | H | 0 | 0 | general GO |
| immune_response (366)                                  | RBPJK.02       | 0.5  | H |   | 0 | 0 | 0 | 0 | general GO |
| skeletal_development (83)                              | AG_rich_coding | 0.5  | 0 |   | 0 | 0 | 0 | 0 | general GO |
| muscle_development (107)                               | TAL1ALPHA47.01 | 0.5  | 0 |   | 0 | 0 | 0 | 0 | general GO |
| muscle_development (107)                               | SRF.02         | 0.49 | 0 | H |   | 0 | 0 | 0 | general GO |
| immune_response (366)                                  | TR2.01         | 0.49 | 0 | H |   | 0 | 0 | 0 | general GO |
| steroid_biosynthesis (42)                              | CAAT.01        | 0.49 | 0 |   | 0 | 0 | 0 | 0 | general GO |
| mitosis (86)                                           | CAAT.01        | 0.49 | 0 |   | 0 | 0 | 0 | 0 | general GO |
| chromosome_organization_and_biogenesis (83)            | CAAT.01        | 0.49 | 0 |   | 0 | 0 | 0 | 0 | general GO |
| cell_division (103)                                    | CAAT.01        | 0.49 | 0 |   | 0 | 0 | 0 | 0 | general GO |
| cell_cycle (273)                                       | CAAT.01        | 0.49 | 0 |   | 0 | 0 | 0 | 0 | general GO |
| immune_response (366)                                  | TAL1BETAE47.01 | 0.49 | M | 0 | M |   | 0 | 0 | general GO |
| chemotaxis (98)                                        | IK3.01         | 0.49 | 0 |   | 0 | 0 | 0 | 0 | general GO |
| sensory_perception (201)                               | IK2.01         | 0.49 | 0 | 0 |   | 0 | 0 | 0 | general GO |
| proteolysis (297)                                      | AREB6.02       | 0.48 | 0 |   | 0 | 0 | 0 | 0 | general GO |
| immune_response (366)                                  | PU1.01         | 0.48 | 0 |   | 0 | 0 | 0 | 0 | general GO |
| cell_surface_receptor_linked_signal_transduction (169) | PU1.01         | 0.48 | 0 |   | 0 | 0 | 0 | 0 | general GO |
| inflammatory_response (163)                            | ETS2.01        | 0.48 | 0 |   | 0 | 0 | 0 | 0 | general GO |
| immune_response (366)                                  | ETS2.01        | 0.48 | H |   | 0 | 0 | 0 | 0 | general GO |
| chemotaxis (98)                                        | ETS2.01        | 0.48 | 0 |   | 0 | 0 | 0 | 0 | general GO |
| cell_surface_receptor_linked_signal_transduction (169) | ETS2.01        | 0.48 | 0 |   | 0 | 0 | 0 | 0 | general GO |
| steroid_biosynthesis (42)                              | NFY.02         | 0.48 | 0 |   | 0 | 0 | 0 | 0 | general GO |
| mitosis (86)                                           | NFY.02         | 0.48 | 0 |   | 0 | 0 | 0 | 0 | general GO |
| chromosome_organization_and_biogenesis (83)            | NFY.02         | 0.48 | 0 |   | 0 | 0 | 0 | 0 | general GO |
| cell_cycle (273)                                       | NFY.02         | 0.48 | 0 |   | 0 | 0 | 0 | 0 | general GO |
| biosynthesis (32)                                      | NFY.02         | 0.48 | 0 |   | 0 | 0 | 0 | 0 | general GO |
| immune_response (366)                                  | PAX2.01        | 0.47 | 0 |   | 0 | 0 | 0 | 0 | general GO |
| immune_response (366)                                  | PPARA.01       | 0.47 | H |   | 0 | 0 | 0 | 0 | general GO |
| immune_response (366)                                  | NFE2L2.01      | 0.47 |   | H |   | 0 | 0 | 0 | general GO |
| muscle_development (107)                               | MTATA.01       | 0.47 | 0 |   | 0 | 0 | 0 | 0 | general GO |
| nucleosome_assembly (71)                               | NFY.03         | 0.47 | 0 |   | 0 | 0 | 0 | 0 | general GO |
| mitosis (86)                                           | NFY.03         | 0.47 | 0 |   | 0 | 0 | 0 | 0 | general GO |
| chromosome_organization_and_biogenesis (83)            | NFY.03         | 0.47 | 0 |   | 0 | 0 | 0 | 0 | general GO |
| cell_division (103)                                    | NFY.03         | 0.47 | 0 |   | 0 | 0 | 0 | 0 | general GO |
| cell_cycle (273)                                       | NFY.03         | 0.47 | 0 |   | 0 | 0 | 0 | 0 | general GO |
| muscle_development (107)                               | SRF.03         | 0.47 | H |   | H |   | 0 | 0 | general GO |
| lipid_transport (41)                                   | SRF.03         | 0.47 | 0 |   | 0 | 0 | 0 | 0 | general GO |
| immune_response (366)                                  | BACH1.01       | 0.47 | H |   |   | 0 | 0 | 0 | general GO |
| G_protein_coupled_receptor_protein_signaling_pathwa    | PLZF.01        | 0.47 | 0 | 0 | 0 | 0 | 0 | 0 | general GO |
| immune_response (366)                                  | ARE.01         | 0.47 | H |   | 0 | 0 | 0 | 0 | general GO |
| sensory_perception (201)                               | MEL1_02        | 0.46 | H |   | H |   | 0 | 0 | general GO |
| immune_response (366)                                  | STAT6.01       | 0.46 | H |   | H |   | 0 | 0 | general GO |
| sensory_perception_of_smell (40)                       | MIT.01         | 0.46 | 0 |   | 0 | 0 | 0 | 0 | general GO |
| immune_response (366)                                  | MIT.01         | 0.46 | H | M |   | 0 | 0 | 0 | general GO |
| immune_response (366)                                  | RP58.01        | 0.46 | 0 |   | 0 | 0 | 0 | 0 | general GO |
| inflammatory_response (163)                            | COMP1.01       | 0.45 | H |   | 0 | 0 | 0 | 0 | general GO |
| immune_response (366)                                  | PXRCAR.01      | 0.45 | 0 |   | 0 | 0 | 0 | 0 | general GO |
| inflammatory_response (163)                            | DBP.01         | 0.45 | 0 |   | 0 | 0 | 0 | 0 | general GO |
| inflammatory_response (163)                            | BARBIE.01      | 0.45 | 0 |   | 0 | 0 | 0 | 0 | general GO |
| G_protein_coupled_receptor_protein_signaling_pathwa    | BRACH.01       | 0.45 | 0 |   | 0 | 0 | 0 | 0 | general GO |
| visual_perception (142)                                | PTX1.01        | 0.45 | 0 | H |   | 0 | 0 | 0 | general GO |
| immune_response (366)                                  | PAX8.01        | 0.45 | 0 |   | 0 | 0 | 0 | 0 | general GO |
| cell_surface_receptor_linked_signal_transduction (169) | GATA1.01       | 0.45 | H |   | 0 | 0 | 0 | 0 | general GO |

|                                                      |              |      |   |   |   |   |   |   |            |
|------------------------------------------------------|--------------|------|---|---|---|---|---|---|------------|
| innate immune response (46)                          | STAT.01      | 0.44 | 0 |   | 0 | 0 | 0 | 0 | general GO |
| immune response (366)                                | MYT1L.01     | 0.44 | H |   | 0 | 0 | 0 | 0 | general GO |
| immune response (366)                                | STAT.01      | 0.44 | 0 |   | 0 | 0 | 0 | 0 | general GO |
| immune response (366)                                | TCF11.01     | 0.44 | 0 | H |   | 0 | 0 | 0 | general GO |
| inflammatory response (163)                          | BCL6.02      | 0.44 | 0 |   | H | 0 | 0 | 0 | general GO |
| immune response (366)                                | BCL6.02      | 0.44 | 0 |   | 0 | 0 | 0 | 0 | general GO |
| inflammatory response (163)                          | TCF11MAFG.01 | 0.43 |   | H | 0 | H | 0 | 0 | general GO |
| immune response (366)                                | TCF11MAFG.01 | 0.43 |   |   | 0 | 0 | 0 | 0 | general GO |
| G protein coupled receptor protein signaling pathway | TCF11MAFG.01 | 0.43 | 0 |   | H | H | 0 | 0 | general GO |
| immune response (366)                                | ILF1_01      | 0.43 | 0 |   | H | 0 | 0 | 0 | general GO |
| signal transduction (1189)                           | AP1.01       | 0.43 | 0 |   | 0 | 0 | 0 | 0 | general GO |
| proteolysis (297)                                    | AP1.01       | 0.43 | 0 |   | 0 | 0 | 0 | 0 | general GO |
| inflammatory response (163)                          | AP1.01       | 0.43 | M |   | 0 | 0 | 0 | 0 | general GO |
| immune response (366)                                | AP1.01       | 0.43 | H |   | H | 0 | 0 | 0 | general GO |
| chemotaxis (98)                                      | AP1.01       | 0.43 | M |   | H | 0 | 0 | 0 | general GO |
| response to virus (55)                               | ISRE.01      | 0.43 | 0 |   | H | 0 | 0 | 0 | general GO |
| inflammatory response (163)                          | ISRE.01      | 0.43 | 0 |   | 0 | 0 | 0 | 0 | general GO |
| immune response (366)                                | ISRE.01      | 0.43 |   |   | 0 | 0 | 0 | 0 | general GO |
| response to virus (55)                               | IRF2.01      | 0.43 | 0 | H |   | 0 | 0 | 0 | general GO |
| immune response (366)                                | IRF2.01      | 0.43 |   |   | 0 | 0 | 0 | 0 | general GO |
| response to virus (55)                               | IRF3.01      | 0.42 | 0 |   | 0 | 0 | 0 | 0 | general GO |
| inflammatory response (163)                          | IRF3.01      | 0.42 | 0 |   | 0 | 0 | 0 | 0 | general GO |
| immune response (366)                                | IRF3.01      | 0.42 | H |   | 0 | 0 | 0 | 0 | general GO |
| sensory perception (201)                             | SRF.01       | 0.42 | H |   | 0 | 0 | 0 | 0 | general GO |
| muscle development (107)                             | SRF.01       | 0.42 | 0 |   | 0 | 0 | 0 | 0 | general GO |
| inflammatory response (163)                          | SRF.01       | 0.42 | 0 |   | 0 | 0 | 0 | 0 | general GO |
| immune response (366)                                | SRF.01       | 0.42 | H |   | M | 0 | 0 | 0 | general GO |
| chemotaxis (98)                                      | SRF.01       | 0.42 | 0 |   | 0 | 0 | 0 | 0 | general GO |
| inflammatory response (163)                          | PRDM1.01     | 0.41 | M |   | 0 | 0 | 0 | 0 | general GO |
| immune response (366)                                | PRDM1.01     | 0.41 | M |   | 0 | 0 | 0 | 0 | general GO |
| defense response (100)                               | PRDM1.01     | 0.41 | 0 |   | 0 | 0 | 0 | 0 | general GO |
| inflammatory response (163)                          | HMG1Y.01     | 0.41 | 0 |   | 0 | 0 | 0 | 0 | general GO |
| immune response (366)                                | HMG1Y.01     | 0.41 | H |   | 0 | H | 0 | 0 | general GO |
| chemotaxis (98)                                      | HMG1Y.01     | 0.41 | 0 |   | H | 0 | 0 | 0 | general GO |
| pregnancy (41)                                       | PDX1_Gabi    | 0.41 | 0 |   | 0 | 0 | 0 | 0 | general GO |
| immune response (366)                                | HBP1_01      | 0.41 |   | H | 0 | 0 | 0 | 0 | general GO |
| sensory perception (201)                             | GFI1.01      | 0.41 | 0 |   | H | 0 | 0 | 0 | general GO |
| immune response (366)                                | PSE_02       | 0.41 | 0 |   | 0 | 0 | 0 | 0 | general GO |
| mitosis (86)                                         | CHR.01       | 0.41 | H |   | 0 | 0 | 0 | 0 | general GO |
| innate immune response (46)                          | BRN4.01      | 0.4  |   | 0 | 0 | 0 | 0 | 0 | general GO |
| immune response (366)                                | BRN4.01      | 0.4  |   | 0 | H | 0 | 0 | 0 | general GO |
| immune response (366)                                | LEF1.02      | 0.4  |   | H | H | 0 | 0 | 0 | general GO |
| cell cell signaling (268)                            | MTBF.01      | 0.4  | 0 |   | 0 | 0 | 0 | 0 | general GO |
| response to virus (55)                               | IRF1.01      | 0.4  | 0 |   | 0 | H | 0 | 0 | general GO |
| inflammatory response (163)                          | IRF1.01      | 0.4  | 0 |   | 0 | 0 | 0 | 0 | general GO |
| immune response (366)                                | IRF1.01      | 0.4  |   |   | 0 | 0 | 0 | 0 | general GO |
| response to virus (55)                               | CEBPB.01     | 0.4  | 0 |   | 0 | 0 | 0 | 0 | general GO |
| proteolysis (297)                                    | CEBPB.01     | 0.4  | 0 |   | 0 | 0 | 0 | 0 | general GO |
| inflammatory response (163)                          | CEBPB.01     | 0.4  | 0 |   | H | 0 | 0 | 0 | general GO |
| immune response (366)                                | GATA1.04     | 0.4  |   | H | H | 0 | 0 | 0 | general GO |
| defense response (100)                               | CEBPB.01     | 0.4  | 0 |   | 0 | 0 | 0 | 0 | general GO |
| visual perception (142)                              | CRX.01       | 0.39 | 0 |   | 0 | 0 | 0 | 0 | general GO |
| sensory perception (201)                             | CRX.01       | 0.39 | 0 |   | H | 0 | 0 | 0 | general GO |
| immune response (366)                                | OCT1.05      | 0.39 |   | H | H | 0 | 0 | 0 | general GO |
| sensory perception (201)                             | AARE.01      | 0.39 | 0 | H | 0 |   | 0 | 0 | general GO |
| inflammatory response (163)                          | AARE.01      | 0.39 | 0 |   | 0 | 0 | 0 | 0 | general GO |
| immune response (366)                                | AARE.01      | 0.39 | 0 |   | 0 | 0 | 0 | 0 | general GO |
| cell cell signaling (268)                            | AARE.01      | 0.39 | 0 |   | 0 | 0 | 0 | 0 | general GO |
| inflammatory response (163)                          | LTATA_01     | 0.39 | 0 |   | 0 | 0 | 0 | 0 | general GO |
| cell cell signaling (268)                            | LTATA_01     | 0.39 | 0 |   | 0 | 0 | 0 | 0 | general GO |
| antimicrobial humoral response (87)                  | LTATA_01     | 0.39 | 0 |   | 0 | 0 | 0 | 0 | general GO |
| inflammatory response (163)                          | BRN2.01      | 0.39 | 0 |   | 0 | 0 | 0 | 0 | general GO |
| immune response (366)                                | BRN2.01      | 0.39 | H |   | H | 0 | H | 0 | general GO |
| response to virus (55)                               | IRF4.01      | 0.39 | 0 |   | 0 | 0 | 0 | 0 | general GO |

|                                                        |           |      |   |   |   |   |   |   |            |
|--------------------------------------------------------|-----------|------|---|---|---|---|---|---|------------|
| inflammatory_response (163)                            | IRF4.01   | 0.39 | M |   | 0 | 0 | 0 | 0 | general GO |
| immune_response (366)                                  | IRF4.01   | 0.39 |   |   | 0 | 0 | 0 | 0 | general GO |
| visual_perception (142)                                | OTX2.01   | 0.39 | 0 |   | 0 | 0 | 0 | 0 | general GO |
| sensory_perception (201)                               | OTX2.01   | 0.39 | 0 | H | 0 | 0 | 0 | 0 | general GO |
| inflammatory_response (163)                            | STAT5.01  | 0.39 | 0 |   | 0 | 0 | 0 | 0 | general GO |
| immune_response (366)                                  | STAT5.01  | 0.39 | 0 |   | 0 | 0 | 0 | 0 | general GO |
| immune_response (366)                                  | GATA1.03  | 0.39 |   | H | H | 0 | 0 | 0 | general GO |
| chemotaxis (98)                                        | GATA1.03  | 0.39 | H |   | 0 | 0 | H | 0 | general GO |
| antimicrobial_humoral_response (87)                    | GATA1.03  | 0.39 |   | H | H | 0 | 0 | 0 | general GO |
| immune_response (366)                                  | BCL6.01   | 0.39 | 0 |   |   | H | 0 | 0 | general GO |
| immune_response (366)                                  | OCT1.04   | 0.38 |   | H | H | 0 | 0 | 0 | general GO |
| immune_response (366)                                  | GFI1B.01  | 0.38 | 0 |   | 0 | 0 | H | 0 | general GO |
| nucleosome_assembly (71)                               | PDX1.01   | 0.38 | 0 | H | H | 0 |   | 0 | general GO |
| muscle_development (107)                               | AMEF2.01  | 0.38 | 0 |   | 0 | 0 | 0 | 0 | general GO |
| immune_response (366)                                  | AMEF2.01  | 0.38 | 0 |   | 0 | 0 | 0 | 0 | general GO |
| immune_response (366)                                  | RORA2.01  | 0.38 |   | H | H | H | 0 | 0 | general GO |
| inflammatory_response (163)                            | NFAT.01   | 0.38 | M |   | H | 0 | 0 | 0 | general GO |
| immune_response (366)                                  | NFAT.01   | 0.38 |   |   | 0 | 0 | 0 | 0 | general GO |
| chemotaxis (98)                                        | NFAT.01   | 0.38 | 0 |   | 0 | 0 | 0 | 0 | general GO |
| cell_surface_receptor_linked_signal_transduction (169) | NFAT.01   | 0.38 | 0 |   | 0 | 0 | 0 | 0 | general GO |
| cell_cell_signaling (268)                              | NFAT.01   | 0.38 | 0 |   | 0 | 0 | 0 | 0 | general GO |
| G_protein_coupled_receptor_protein_signaling_pathwa    | FREAC4.01 | 0.38 | M |   | 0 | 0 | 0 | 0 | general GO |
| innate_immune_response (46)                            | CDX2.01   | 0.38 |   | H | 0 | 0 | H | H | general GO |
| inflammatory_response (163)                            | CDX2.01   | 0.38 | H |   | 0 | H | H | 0 | general GO |
| immune_response (366)                                  | CDX2.01   | 0.38 | H |   | H | 0 | 0 | 0 | general GO |
| chemotaxis (98)                                        | CDX2.01   | 0.38 | 0 |   | 0 | 0 | 0 | 0 | general GO |
| cell_cell_signaling (268)                              | CDX2.01   | 0.38 | 0 |   | 0 | 0 | 0 | 0 | general GO |
| immune_response (366)                                  | MEF2.01   | 0.38 |   |   | 0 | 0 | 0 | 0 | general GO |
| inflammatory_response (163)                            | MMEF2.01  | 0.37 | 0 |   | 0 | 0 | H | 0 | general GO |
| immune_response (366)                                  | MMEF2.01  | 0.37 | 0 |   | 0 | 0 | H | 0 | general GO |
| sensory_perception (201)                               | GATA2.02  | 0.36 | 0 |   | H | H | 0 | 0 | general GO |
| immune_response (366)                                  | GATA2.02  | 0.36 | H |   | H | 0 | H | 0 | general GO |
| immune_response (366)                                  | GATA1.05  | 0.36 |   | H |   | 0 | 0 | 0 | general GO |
| sensory_perception (201)                               | XFD3.01   | 0.36 | 0 |   | 0 | 0 | 0 | 0 | general GO |
| G_protein_coupled_receptor_protein_signaling_pathwa    | XFD3.01   | 0.36 | H |   | 0 | 0 | H | 0 | general GO |
| response_to_virus (55)                                 | IRF7.01   | 0.36 | H |   | 0 | 0 | 0 | 0 | general GO |
| inflammatory_response (163)                            | IRF7.01   | 0.36 | M |   | 0 | 0 | 0 | 0 | general GO |
| immune_response (366)                                  | IRF7.01   | 0.36 | H |   | H | 0 | 0 | 0 | general GO |
| sensory_perception (201)                               | OCT1P.01  | 0.36 | H |   | H | H | 0 | 0 | general GO |
| immune_response (366)                                  | OCT1P.01  | 0.36 |   | H | H | H | 0 | 0 | general GO |
| innate_immune_response (46)                            | OCT.01    | 0.35 |   | H | 0 | 0 | 0 | 0 | general GO |
| immune_response (366)                                  | OCT.01    | 0.35 |   | H | H | 0 | 0 | 0 | general GO |
| visual_perception (142)                                | SIX3.01   | 0.35 | 0 |   | H | 0 | 0 | H | general GO |
| sensory_perception (201)                               | SIX3.01   | 0.35 | 0 |   | H | 0 | 0 | 0 | general GO |
| immune_response (366)                                  | GATA2.01  | 0.35 |   |   | 0 | M | 0 | 0 | general GO |
| inflammatory_response (163)                            | CDX1.01   | 0.35 | M |   | 0 | 0 | 0 | 0 | general GO |
| immune_response (366)                                  | CDX1.01   | 0.35 | H |   | 0 | 0 | 0 | 0 | general GO |
| immune_response (366)                                  | NKX25.02  | 0.35 |   | H | H | 0 | 0 | 0 | general GO |
| immune_response (366)                                  | OCT1.02   | 0.3  |   | H | 0 | 0 | 0 | 0 | general GO |
| inflammatory_response (163)                            | DLX3.01   | 0.34 | 0 |   | 0 | 0 | 0 | 0 | general GO |
| innate_immune_response (46)                            | HNF1.02   | 0.34 | H |   | 0 | 0 | H | 0 | general GO |
| blood_coagulation (70)                                 | HNF1.02   | 0.34 | 0 |   | 0 | 0 | 0 | 0 | general GO |
| inflammatory_response (163)                            | XFD1.01   | 0.34 | 0 |   | 0 | 0 | 0 | 0 | general GO |
| immune_response (366)                                  | XFD1.01   | 0.34 |   | H | 0 | 0 | 0 | 0 | general GO |
| immune_response (366)                                  | HMEF2.01  | 0.34 | H |   | 0 | 0 | 0 | 0 | general GO |
| sensory_perception (201)                               | GATA3.01  | 0.34 | H |   | H | 0 | H | 0 | general GO |
| inflammatory_response (163)                            | GATA3.01  | 0.34 | H |   | 0 | 0 | H | 0 | general GO |
| chemotaxis (98)                                        | GATA3.01  | 0.34 |   |   | 0 | 0 | H | 0 | general GO |
| inflammatory_response (163)                            | PAX4.01   | 0.33 | 0 |   | 0 | 0 | 0 | 0 | general GO |
| inflammatory_response (163)                            | EVI1.04   | 0.33 | 0 |   | 0 | 0 | 0 | 0 | general GO |
| immune_response (366)                                  | EVI1.04   | 0.33 | H |   | 0 | H | 0 | 0 | general GO |
| signal_transduction (1189)                             | EVI1.02   | 0.33 | M |   | 0 | 0 | 0 | 0 | general GO |
| sensory_perception (201)                               | EVI1.02   | 0.33 | 0 |   | H | H | 0 | 0 | general GO |
| immune_response (366)                                  | EVI1.02   | 0.33 |   | H | H | 0 | 0 | 0 | general GO |

|                                                        |           |      |   |   |   |   |   |   |            |
|--------------------------------------------------------|-----------|------|---|---|---|---|---|---|------------|
| G protein coupled receptor protein signaling pathwa    | EV11.02   | 0.33 | 0 | H | 0 | 0 | 0 | 0 | general GO |
| inflammatory_response (163)                            | BRN3.02   | 0.33 | 0 |   | 0 | 0 | H | 0 | general GO |
| immune_response (366)                                  | BRN2.03   | 0.32 | H | H | 0 | 0 | 0 | 0 | general GO |
| chromosome_organization_and_biogenesis (83)            | BRN2.03   | 0.32 | 0 | H | 0 | H | 0 | 0 | general GO |
| sensory_perception (201)                               | XFD2.01   | 0.32 | 0 | H | 0 | H | 0 | 0 | general GO |
| immune_response (366)                                  | XFD2.01   | 0.32 | M | H | 0 | 0 | 0 | 0 | general GO |
| inflammatory_response (163)                            | LMX1B.01  | 0.32 | 0 |   | 0 | 0 | H | 0 | general GO |
| immune_response (366)                                  | LMX1B.01  | 0.32 | 0 | H | 0 | 0 | 0 | 0 | general GO |
| proteolysis (297)                                      | FREAC3.01 | 0.32 | M |   | 0 | 0 | 0 | 0 | general GO |
| inflammatory_response (163)                            | CART1.01  | 0.32 | 0 |   | 0 | 0 | 0 | 0 | general GO |
| immune_response (366)                                  | CART1.01  | 0.32 | H |   | 0 | 0 | 0 | 0 | general GO |
| cell_surface_receptor_linked_signal_transduction (169) | EN1.01    | 0.32 | 0 |   | 0 | 0 | 0 | 0 | general GO |
| transport (940)                                        | HNF1.03   | 0.31 | 0 |   | 0 | 0 | 0 | 0 | general GO |
| sodium_ion_transport (75)                              | HNF1.03   | 0.31 | 0 |   | 0 | 0 | 0 | 0 | general GO |
| immune_response (366)                                  | HNF1.03   | 0.31 | H |   | 0 | 0 | 0 | 0 | general GO |
| blood_coagulation (70)                                 | HNF1.03   | 0.31 | 0 |   | 0 | 0 | 0 | 0 | general GO |
| signal_transduction (1189)                             | EV11.01   | 0.31 | M |   | 0 | 0 | 0 | 0 | general GO |
| G protein coupled receptor protein signaling pathwa    | EV11.01   | 0.31 | H |   | 0 | 0 | 0 | 0 | general GO |
| synaptic_transmission (153)                            | MSX.01    | 0.3  | 0 |   | 0 | 0 | 0 | 0 | general GO |
| immune_response (366)                                  | ATATA.01  | 0.3  | 0 |   | 0 | 0 | 0 | 0 | general GO |
| immune_response (366)                                  | EV11.06   | 0.3  |   | H | H | H | 0 | 0 | general GO |
| cell_cell_signaling (268)                              | ATATA.01  | 0.3  | 0 |   | 0 | 0 | 0 | 0 | general GO |
| muscle_development (107)                               | MEF2.02   | 0.3  | 0 |   | 0 | 0 | 0 | 0 | general GO |
| inflammatory_response (163)                            | MEF2.02   | 0.3  | 0 |   | 0 | 0 | 0 | 0 | general GO |
| immune_response (366)                                  | MEF2.02   | 0.3  | 0 |   | 0 | 0 | 0 | 0 | general GO |
| inflammatory_response (163)                            | MEF2.03   | 0.3  | 0 |   | 0 | 0 | 0 | 0 | general GO |
| immune_response (366)                                  | MEF2.03   | 0.3  | H |   | 0 | 0 | 0 | 0 | general GO |
| transport (940)                                        | HNF1.01   | 0.3  | 0 |   | 0 | 0 | 0 | 0 | general GO |
| sodium_ion_transport (75)                              | HNF1.01   | 0.3  | 0 |   | 0 | 0 | 0 | 0 | general GO |
| proteolysis (297)                                      | HNF1.01   | 0.3  | H |   | 0 | 0 | 0 | 0 | general GO |
| innate_immune_response (46)                            | HNF1.01   | 0.3  |   | H | 0 | 0 | H | 0 | general GO |
| immune_response (366)                                  | HNF1.01   | 0.3  |   | H | 0 | 0 | 0 | 0 | general GO |
| blood_coagulation (70)                                 | HNF1.01   | 0.3  | H |   | 0 | 0 | 0 | 0 | general GO |
| immune_response (366)                                  | MEF2.05   | 0.29 |   |   | 0 | 0 | 0 | 0 | general GO |
| inflammatory_response (163)                            | RSRFC4.02 | 0.29 | 0 |   | 0 | 0 | 0 | 0 | general GO |
| immune_response (366)                                  | RSRFC4.02 | 0.29 | H |   | 0 | 0 | 0 | 0 | general GO |
| immune_response (366)                                  | MEL1_01   | 0.29 |   | H |   | 0 | 0 | H | general GO |
| immune_response (366)                                  | MEF2.04   | 0.29 | H |   | 0 | 0 | 0 | 0 | general GO |
| immune_response (366)                                  | EV11.05   | 0.29 |   | H | H | 0 | 0 | 0 | general GO |
| G protein coupled receptor protein signaling pathwa    | EV11.05   | 0.29 | H |   | 0 | 0 | 0 | 0 | general GO |
| sensory_perception (201)                               | TATA.01   | 0.28 | 0 |   | 0 | 0 | H | 0 | general GO |
| inflammatory_response (163)                            | TATA.01   | 0.28 | 0 |   | 0 | 0 | 0 | 0 | general GO |
| immune_response (366)                                  | TATA.01   | 0.28 | M |   | 0 | 0 | 0 | 0 | general GO |
| epidermis_development (59)                             | TATA.01   | 0.28 | 0 |   | 0 | 0 | 0 | 0 | general GO |
| digestion (51)                                         | TATA.01   | 0.28 | 0 |   | 0 | 0 | 0 | 0 | general GO |
| chromosome_organization_and_biogenesis (83)            | TATA.01   | 0.28 | 0 | H | 0 | 0 | 0 | 0 | general GO |
| chemotaxis (98)                                        | TATA.01   | 0.28 | 0 |   | 0 | 0 | 0 | 0 | general GO |
| cell_differentiation (192)                             | TATA.01   | 0.28 | 0 |   | 0 | 0 | 0 | 0 | general GO |
| cell_cell_signaling (268)                              | TATA.01   | 0.28 | H |   | 0 | 0 | 0 | 0 | general GO |
| calcium_ion_homeostasis (30)                           | TATA.01   | 0.28 | 0 |   | 0 | 0 | 0 | 0 | general GO |
| immune_response (366)                                  | RSRFC4.01 | 0.28 | 0 |   | 0 | 0 | 0 | 0 | general GO |
| inflammatory_response (163)                            | TATA.02   | 0.28 | 0 |   | 0 | 0 | 0 | 0 | general GO |
| immune_response (366)                                  | TATA.02   | 0.28 | 0 |   | 0 | 0 | 0 | 0 | general GO |
| epidermis_development (59)                             | TATA.02   | 0.28 | 0 |   | 0 | 0 | 0 | 0 | general GO |
| cell_cell_signaling (268)                              | TATA.02   | 0.28 | 0 |   | 0 | 0 | 0 | 0 | general GO |
| inflammatory_response (163)                            | MYT1.02   | 0.28 | 0 |   | 0 | 0 | 0 | 0 | general GO |
| immune_response (366)                                  | MYT1.02   | 0.28 | H | H | 0 | 0 | 0 | 0 | general GO |
| inflammatory_response (163)                            | PIT1.01   | 0.27 | H |   | 0 | 0 | 0 | 0 | general GO |
| immune_response (366)                                  | PIT1.01   | 0.27 | H |   | H | 0 | 0 | 0 | general GO |
| blood_coagulation (70)                                 | SATB1.01  | 0.27 |   | 0 | 0 | 0 | 0 | 0 | general GO |
| inflammatory_response (163)                            | HFH1.01   | 0.27 | 0 |   | 0 | 0 | 0 | 0 | general GO |
| proteolysis (297)                                      | HFH8.01   | 0.27 | 0 |   | 0 | 0 | 0 | 0 | general GO |
| immune_response (366)                                  | HFH8.01   | 0.27 |   | H | 0 | 0 | 0 | 0 | general GO |
| inflammatory_response (163)                            | MYT1.01   | 0.27 | M | H | 0 | 0 | 0 | 0 | general GO |

|                                                     |           |      |   |   |   |   |   |            |
|-----------------------------------------------------|-----------|------|---|---|---|---|---|------------|
| immune_response (366)                               | OCT1.01   | 0.26 | H | 0 | H | 0 | 0 | general GO |
| immune_response (366)                               | BRN5.01   | 0.26 | H | 0 | 0 | 0 | 0 | general GO |
| steroid_metabolism (54)                             | HNF3B.01  | 0.26 | 0 | 0 | 0 | 0 | 0 | general GO |
| immune_response (366)                               | NKX31.01  | 0.25 | H | 0 | 0 | 0 | 0 | general GO |
| immune_response (366)                               | EVI1.03   | 0.24 | H | H | 0 | 0 | H | general GO |
| G_protein_coupled_receptor_protein_signaling_pathwa | EVI1.03   | 0.24 | H | H | 0 | 0 | 0 | general GO |
| immune_response (366)                               | BRIGHT.01 | 0.22 | 0 | 0 | 0 | 0 | 0 | general GO |
| innate_immune_response (46)                         | OCT1.06   | 0.22 | H | 0 | 0 | 0 | 0 | general GO |
| inflammatory_response (163)                         | OCT1.06   | 0.22 | H | 0 | M | 0 | 0 | general GO |
| immune_response (366)                               | OCT1.06   | 0.22 | 0 | 0 | 0 | 0 | 0 | general GO |
| proteolysis (297)                                   | LHX3.01   | 0.14 | H | 0 | 0 | 0 | 0 | general GO |
| immune_response (366)                               | LHX3.01   | 0.14 | 0 | 0 | 0 | 0 | 0 | general GO |

|                                                  |         |      |   |   |   |   |   |    |
|--------------------------------------------------|---------|------|---|---|---|---|---|----|
| inflammatory_response (163)                      | poly_A  | 0.01 | 0 | 0 | 0 | 0 | 0 |    |
| immune_response (366)                            | poly_A  | 0.01 | H | 0 | 0 | 0 | 0 |    |
| transcription (930)                              | GC_rich | 0.99 | H |   |   |   |   | &H |
| regulation_of_transcription_DNA_dependent (1066) | GC_rich | 0.99 | M |   |   |   |   | &H |
| development (530)                                | GC_rich | 0.99 | 0 | 0 | M | 0 | M |    |
| ubiquitin_cycle (154)                            | GC_rich | 0.99 | H | 0 | 0 | 0 | 0 |    |
| intracellular_protein_transport (191)            | GC_rich | 0.99 | H | 0 | 0 | 0 | 0 |    |
| transcription (930)                              | poly_C  | 0.99 |   |   |   | M |   | &H |
| regulation_of_transcription_DNA_dependent (1066) | poly_C  | 0.99 |   |   |   |   |   | &H |
| regulation_of_transcription (266)                | poly_C  | 0.99 | M | 0 |   | 0 | M |    |
| development (530)                                | poly_C  | 0.99 | M | H | H |   | M |    |
| Wnt_receptor_signaling_pathway (66)              | poly_C  | 0.99 | 0 |   | H | H | 0 | 0  |
| transcription_RNA_polyII_promoter (190)          | poly_C  | 0.99 | 0 | 0 |   | 0 | 0 | 0  |
| potassium_ion_transport (108)                    | poly_C  | 0.99 | 0 | H | H |   | 0 | 0  |







# 300bp Window

| GO group                                         | Motifs      | motif GC | -199 - 100 | 101 - 400 | 401 - 700 | 701 - 1000 | GO-classes       |
|--------------------------------------------------|-------------|----------|------------|-----------|-----------|------------|------------------|
| transcription (930)                              | GC_rich     | 0.99     |            |           |           |            | transcription GO |
| transcription (930)                              | poly_C      | 0.99     |            |           |           |            | transcription GO |
| transcription (930)                              | SP1.01      | 0.78     | H          |           |           |            | transcription GO |
| transcription (930)                              | WT1.01      | 0.77     | H          |           |           |            | transcription GO |
| transcription (930)                              | HES1.02     | 0.76     | 0          |           | H         |            | transcription GO |
| transcription (930)                              | MAZR.01     | 0.76     |            |           |           |            | transcription GO |
| transcription (930)                              | ZNF202.01   | 0.73     |            |           |           |            | transcription GO |
| transcription (930)                              | AP2.01      | 0.73     | H          |           |           |            | transcription GO |
| transcription (930)                              | ZF5.01      | 0.72     | H          |           | H         |            | transcription GO |
| transcription (930)                              | ZF9.01      | 0.72     | H          |           |           |            | transcription GO |
| transcription (930)                              | EGR3.01     | 0.71     | H          |           |           |            | transcription GO |
| transcription (930)                              | NRF1_01     | 0.71     | H          |           |           |            | transcription GO |
| transcription (930)                              | MYCMAX.03   | 0.7      | 0          | H         | H         |            | transcription GO |
| transcription (930)                              | ZBP89.01    | 0.7      |            |           | H         |            | transcription GO |
| transcription (930)                              | HELT.01     | 0.69     | H          | H         | H         |            | transcription GO |
| transcription (930)                              | NGFIC.01    | 0.69     | H          |           | H         | H          | transcription GO |
| transcription (930)                              | CKROX_01    | 0.68     |            |           |           |            | transcription GO |
| transcription (930)                              | EGR1.02     | 0.68     |            |           |           |            | transcription GO |
| transcription (930)                              | HIC1_01     | 0.68     | 0          | H         | 0         |            | transcription GO |
| transcription (930)                              | BKLF.01     | 0.68     | 0          | 0         | H         |            | transcription GO |
| transcription (930)                              | GC.01       | 0.68     | 0          | H         |           |            | transcription GO |
| transcription (930)                              | MZF1.01     | 0.68     | H          | M         |           | H          | transcription GO |
| transcription (930)                              | MTF-1.01    | 0.65     | 0          |           | 0         | 0          | transcription GO |
| transcription (930)                              | MAZ.01      | 0.65     | H          |           |           |            | transcription GO |
| transcription (930)                              | ZIC2_01     | 0.65     | H          | H         | 0         |            | transcription GO |
| transcription (930)                              | ATF6.01     | 0.64     | 0          |           | H         | 0          | transcription GO |
| transcription (930)                              | PLAG1_01    | 0.63     |            |           |           |            | transcription GO |
| transcription (930)                              | EBVR.01     | 0.63     | H          | 0         | 0         |            | transcription GO |
| transcription (930)                              | AHRARNT.01  | 0.62     | 0          | H         | H         |            | transcription GO |
| transcription (930)                              | HES1.01     | 0.62     | H          |           | H         | H          | transcription GO |
| transcription (930)                              | MUSCLE_IN   | 0.62     | 0          |           | H         | H          | transcription GO |
| transcription (930)                              | GABP.01     | 0.62     | 0          | M         | H         | H          | transcription GO |
| transcription (930)                              | MUSCLE_IN   | 0.61     | 0          |           | H         | 0          | transcription GO |
| transcription (930)                              | CDE.01      | 0.6      |            |           |           |            | transcription GO |
| transcription (930)                              | AHR.01      | 0.59     | H          | H         | H         | M          | transcription GO |
| transcription (930)                              | E2F.02      | 0.59     |            | H         |           |            | transcription GO |
| transcription (930)                              | WHN.01      | 0.59     | H          | H         | 0         |            | transcription GO |
| transcription (930)                              | PAX5.01     | 0.57     | 0          | H         | M         | H          | transcription GO |
| transcription (930)                              | GAGA.01     | 0.56     |            |           |           | H          | transcription GO |
| transcription (930)                              | E2F.03      | 0.54     | H          | H         |           |            | transcription GO |
| transcription (930)                              | AC_rich_cod | 0.5      |            | 0         | 0         | H          | transcription GO |
| transcription (930)                              | AG_rich_cod | 0.5      |            |           | M         | 0          | transcription GO |
| transcription (930)                              | GKLF.01     | 0.49     | M          | H         | 0         | 0          | transcription GO |
| transcription (930)                              | CAAT.01     | 0.49     | 0          | H         | M         | 0          | transcription GO |
| transcription (930)                              | NFY.02      | 0.48     | 0          | H         | M         | 0          | transcription GO |
| regulation_of_transcription_from_RNA_polymerase  | CDE.01      | 0.6      | H          | H         | H         |            | transcription GO |
| regulation_of_transcription_DNA_dependent (1066) | GC_rich     | 0.99     |            |           |           |            | transcription GO |
| regulation_of_transcription_DNA_dependent (1066) | poly_C      | 0.99     |            |           |           |            | transcription GO |
| regulation_of_transcription_DNA_dependent (1066) | SP1.01      | 0.78     | H          |           |           |            | transcription GO |
| regulation_of_transcription_DNA_dependent (1066) | WT1.01      | 0.77     |            |           |           |            | transcription GO |
| regulation_of_transcription_DNA_dependent (1066) | HES1.02     | 0.76     | 0          |           |           | H          | transcription GO |

|                                                  |             |      |   |   |   |   |   |   |                  |
|--------------------------------------------------|-------------|------|---|---|---|---|---|---|------------------|
| regulation_of_transcription_DNA_dependent (1066) | MAZR.01     | 0.76 |   |   |   |   |   |   | transcription GO |
| regulation_of_transcription_DNA_dependent (1066) | ZNF202.01   | 0.73 |   |   |   |   |   |   | transcription GO |
| regulation_of_transcription_DNA_dependent (1066) | AP2.01      | 0.73 |   |   |   |   |   |   | transcription GO |
| regulation_of_transcription_DNA_dependent (1066) | ZF5.01      | 0.72 |   |   |   |   |   | H | transcription GO |
| regulation_of_transcription_DNA_dependent (1066) | ZF9.01      | 0.72 | H |   |   |   |   |   | transcription GO |
| regulation_of_transcription_DNA_dependent (1066) | EGR3.01     | 0.71 | H |   |   |   |   |   | transcription GO |
| regulation_of_transcription_DNA_dependent (1066) | NRF1_01     | 0.71 | H |   |   |   |   |   | transcription GO |
| regulation_of_transcription_DNA_dependent (1066) | MYCMAX.03   | 0.7  | 0 |   | H | H |   |   | transcription GO |
| regulation_of_transcription_DNA_dependent (1066) | NFKAPPAB5   | 0.7  | 0 | M | 0 |   |   |   | transcription GO |
| regulation_of_transcription_DNA_dependent (1066) | ZBP89.01    | 0.7  |   |   |   |   |   |   | transcription GO |
| regulation_of_transcription_DNA_dependent (1066) | HELT.01     | 0.69 | H |   |   |   |   | H | transcription GO |
| regulation_of_transcription_DNA_dependent (1066) | NGFIC.01    | 0.69 | H |   |   | H |   |   | transcription GO |
| regulation_of_transcription_DNA_dependent (1066) | CKROX_01    | 0.68 |   |   |   |   |   |   | transcription GO |
| regulation_of_transcription_DNA_dependent (1066) | EGR1.02     | 0.68 |   |   |   |   |   |   | transcription GO |
| regulation_of_transcription_DNA_dependent (1066) | HIC1_01     | 0.68 | 0 | 0 | H |   |   |   | transcription GO |
| regulation_of_transcription_DNA_dependent (1066) | BKLF.01     | 0.68 | 0 | 0 | H |   |   |   | transcription GO |
| regulation_of_transcription_DNA_dependent (1066) | EGR2.01     | 0.68 | H | H | H |   |   |   | transcription GO |
| regulation_of_transcription_DNA_dependent (1066) | GC.01       | 0.68 | 0 |   |   |   |   |   | transcription GO |
| regulation_of_transcription_DNA_dependent (1066) | MZF1.01     | 0.68 |   | M |   | H |   |   | transcription GO |
| regulation_of_transcription_DNA_dependent (1066) | EGR1.01     | 0.67 | H | H | H |   |   |   | transcription GO |
| regulation_of_transcription_DNA_dependent (1066) | MTF-1.01    | 0.65 | 0 |   | H |   | 0 |   | transcription GO |
| regulation_of_transcription_DNA_dependent (1066) | MAZ.01      | 0.65 |   |   |   |   |   |   | transcription GO |
| regulation_of_transcription_DNA_dependent (1066) | ZIC2_01     | 0.65 | H |   | H |   |   |   | transcription GO |
| regulation_of_transcription_DNA_dependent (1066) | ATF6.01     | 0.64 | 0 |   | H | H |   |   | transcription GO |
| regulation_of_transcription_DNA_dependent (1066) | PLAG1_01    | 0.63 |   |   |   |   |   |   | transcription GO |
| regulation_of_transcription_DNA_dependent (1066) | AHRARNT.01  | 0.62 | 0 | H | H |   |   |   | transcription GO |
| regulation_of_transcription_DNA_dependent (1066) | HES1.01     | 0.62 | H |   |   |   |   | H | transcription GO |
| regulation_of_transcription_DNA_dependent (1066) | MUSCLE_IN   | 0.62 | 0 |   | H |   |   |   | transcription GO |
| regulation_of_transcription_DNA_dependent (1066) | GABP.01     | 0.62 | 0 | M | H | H |   |   | transcription GO |
| regulation_of_transcription_DNA_dependent (1066) | NMYC.01     | 0.62 | 0 |   | H |   | 0 |   | transcription GO |
| regulation_of_transcription_DNA_dependent (1066) | MUSCLE_IN   | 0.61 | 0 |   | H |   |   |   | transcription GO |
| regulation_of_transcription_DNA_dependent (1066) | RREB1.01    | 0.6  | H | H | H | M |   |   | transcription GO |
| regulation_of_transcription_DNA_dependent (1066) | CDE.01      | 0.6  | H |   |   |   |   |   | transcription GO |
| regulation_of_transcription_DNA_dependent (1066) | AHR.01      | 0.59 | 0 | H | H | M |   |   | transcription GO |
| regulation_of_transcription_DNA_dependent (1066) | E2F.02      | 0.59 |   | H |   |   |   |   | transcription GO |
| regulation_of_transcription_DNA_dependent (1066) | WHN.01      | 0.59 | 0 | H | 0 |   |   |   | transcription GO |
| regulation_of_transcription_DNA_dependent (1066) | TAXCREB.01  | 0.58 | 0 | H | M | M |   |   | transcription GO |
| regulation_of_transcription_DNA_dependent (1066) | PAX9.01     | 0.57 | 0 |   | H | 0 |   |   | transcription GO |
| regulation_of_transcription_DNA_dependent (1066) | PAX5.01     | 0.57 | 0 | H |   | H |   |   | transcription GO |
| regulation_of_transcription_DNA_dependent (1066) | PAX5.03     | 0.56 | 0 |   | 0 | 0 |   |   | transcription GO |
| regulation_of_transcription_DNA_dependent (1066) | VDR_RXR.02  | 0.56 | H | 0 | M | 0 |   |   | transcription GO |
| regulation_of_transcription_DNA_dependent (1066) | GAGA.01     | 0.56 |   |   |   | H |   |   | transcription GO |
| regulation_of_transcription_DNA_dependent (1066) | TAXCREB.02  | 0.56 | 0 | 0 | M | H |   |   | transcription GO |
| regulation_of_transcription_DNA_dependent (1066) | E2F.03      | 0.54 | H | H | H |   |   |   | transcription GO |
| regulation_of_transcription_DNA_dependent (1066) | NFY.01      | 0.52 | 0 |   |   |   | 0 |   | transcription GO |
| regulation_of_transcription_DNA_dependent (1066) | AG_rich_cod | 0.5  |   |   |   |   | 0 |   | transcription GO |
| regulation_of_transcription_DNA_dependent (1066) | GKLF.01     | 0.49 |   | H | 0 | 0 |   |   | transcription GO |
| regulation_of_transcription_DNA_dependent (1066) | CAAT.01     | 0.49 | 0 |   | 0 | 0 |   |   | transcription GO |
| regulation_of_transcription_DNA_dependent (1066) | NFY.02      | 0.48 | 0 |   | 0 | 0 |   |   | transcription GO |
| regulation_of_transcription (266)                | GC_rich     | 0.99 | H |   | H |   |   |   | transcription GO |
| regulation_of_transcription (266)                | poly_C      | 0.99 |   |   |   |   |   |   | transcription GO |
| regulation_of_transcription (266)                | SP1.01      | 0.78 | H |   | M | M |   |   | transcription GO |
| regulation_of_transcription (266)                | WT1.01      | 0.77 | H |   | H |   |   |   | transcription GO |
| regulation_of_transcription (266)                | MAZR.01     | 0.76 | H |   |   |   |   |   | transcription GO |
| regulation_of_transcription (266)                | ZNF202.01   | 0.73 |   |   |   |   | M |   | transcription GO |
| regulation_of_transcription (266)                | AP2.01      | 0.73 | 0 |   |   | H |   |   | transcription GO |
| regulation_of_transcription (266)                | ZF5.01      | 0.72 | 0 |   | H | H |   |   | transcription GO |
| regulation_of_transcription (266)                | ZF9.01      | 0.72 | 0 |   | H | 0 |   |   | transcription GO |
| regulation_of_transcription (266)                | EGR3.01     | 0.71 | H | M | H | M |   |   | transcription GO |
| regulation_of_transcription (266)                | ZBP89.01    | 0.7  |   |   |   | H |   |   | transcription GO |
| regulation_of_transcription (266)                | NGFIC.01    | 0.69 | H | M | H | M |   |   | transcription GO |
| regulation_of_transcription (266)                | CKROX_01    | 0.68 |   |   |   |   |   |   | transcription GO |
| regulation_of_transcription (266)                | EGR1.02     | 0.68 | H |   |   | H |   |   | transcription GO |
| regulation_of_transcription (266)                | EGR2.01     | 0.68 | H | 0 | 0 | M |   |   | transcription GO |

|                                             |             |      |   |   |   |                  |
|---------------------------------------------|-------------|------|---|---|---|------------------|
| regulation_of_transcription (266)           | MTF-1.01    | 0.65 | 0 | 0 | 0 | transcription GO |
| regulation_of_transcription (266)           | MAZ.01      | 0.65 |   |   | H | transcription GO |
| regulation_of_transcription (266)           | PLAG1_01    | 0.63 |   |   | H | transcription GO |
| regulation_of_transcription (266)           | HES1.01     | 0.62 | 0 | 0 | H | transcription GO |
| regulation_of_transcription (266)           | CDE.01      | 0.6  | H |   | H | transcription GO |
| regulation_of_transcription (266)           | E2F.02      | 0.59 | 0 | 0 | H | transcription GO |
| regulation_of_transcription (266)           | TAXCREB.01  | 0.58 | 0 | H | M | transcription GO |
| regulation_of_transcription (266)           | VDR_RXR.02  | 0.56 | H | H |   | transcription GO |
| regulation_of_transcription (266)           | GAGA.01     | 0.56 |   | H | M | transcription GO |
| regulation_of_transcription (266)           | AG_rich_cod | 0.5  |   |   | M | transcription GO |
| regulation_of_transcription (266)           | GKLF.01     | 0.49 |   | H | 0 | transcription GO |
| regulation_of_transcription (266)           | CAAT.01     | 0.49 | 0 |   | 0 | transcription GO |
| regulation_of_transcription (266)           | PBX1_MEIS1  | 0.44 | 0 |   | 0 | transcription GO |
| development (530)                           | GC_rich     | 0.99 | H |   |   | transcription GO |
| development (530)                           | poly_C      | 0.99 |   |   | H | transcription GO |
| development (530)                           | SP1.01      | 0.78 | 0 | H | M | transcription GO |
| development (530)                           | WT1.01      | 0.77 | H |   |   | transcription GO |
| development (530)                           | HES1.02     | 0.76 | 0 | 0 |   | transcription GO |
| development (530)                           | MAZR.01     | 0.76 | H |   | H | transcription GO |
| development (530)                           | ZNF202.01   | 0.73 |   |   |   | transcription GO |
| development (530)                           | AP2.01      | 0.73 | H |   |   | transcription GO |
| development (530)                           | ZF9.01      | 0.72 | 0 | 0 | H | transcription GO |
| development (530)                           | NFKAPPAB5   | 0.7  | 0 | H | M | transcription GO |
| development (530)                           | HAND2_E12   | 0.7  | 0 | M | H | transcription GO |
| development (530)                           | ZBP89.01    | 0.7  | H |   |   | transcription GO |
| development (530)                           | NGFIC.01    | 0.69 | 0 |   | 0 | transcription GO |
| development (530)                           | CKROX_01    | 0.68 | 0 |   |   | transcription GO |
| development (530)                           | EGR1.02     | 0.68 | 0 |   | H | transcription GO |
| development (530)                           | HIC1_01     | 0.68 | 0 | H | H | transcription GO |
| development (530)                           | EGR2.01     | 0.68 | 0 | M | 0 | transcription GO |
| development (530)                           | MZF1.01     | 0.68 | H | H | H | transcription GO |
| development (530)                           | EGR1.01     | 0.67 | 0 | M | H | transcription GO |
| development (530)                           | MAZ.01      | 0.65 | H | H |   | transcription GO |
| development (530)                           | ZIC2_01     | 0.65 | 0 | H | 0 | transcription GO |
| development (530)                           | PLAG1_01    | 0.63 |   |   |   | transcription GO |
| development (530)                           | INSM1_01    | 0.63 | 0 | 0 | H | transcription GO |
| development (530)                           | EBVR.01     | 0.63 | 0 | H |   | transcription GO |
| development (530)                           | MUSCLE_IN   | 0.62 | 0 |   | H | transcription GO |
| development (530)                           | CDE.01      | 0.6  | 0 | 0 | H | transcription GO |
| development (530)                           | E2F.02      | 0.59 | 0 | 0 | H | transcription GO |
| development (530)                           | PAX5.01     | 0.57 | 0 | 0 | H | transcription GO |
| development (530)                           | GAGA.01     | 0.56 |   | H | H | transcription GO |
| development (530)                           | AG_rich_cod | 0.5  |   | H | 0 | transcription GO |
| development (530)                           | GKLF.01     | 0.49 | M | H | 0 | transcription GO |
| development (530)                           | MTATA.01    | 0.47 |   | 0 | 0 | transcription GO |
| development (530)                           | AMEF2.01    | 0.38 |   | 0 | 0 | transcription GO |
| Wnt_receptor_signaling_pathway (66)         | GC_rich     | 0.99 |   |   | H | general GO       |
| Wnt_receptor_signaling_pathway (66)         | WT1.01      | 0.77 | 0 | H | M | general GO       |
| Wnt_receptor_signaling_pathway (66)         | ZNF202.01   | 0.73 | M | H | 0 | general GO       |
| Wnt_receptor_signaling_pathway (66)         | ZF5.01      | 0.72 | M | 0 | H | general GO       |
| Wnt_receptor_signaling_pathway (66)         | NRF1_01     | 0.71 | H | 0 | M | general GO       |
| Wnt_receptor_signaling_pathway (66)         | NGFIC.01    | 0.69 | H |   | 0 | general GO       |
| Wnt_receptor_signaling_pathway (66)         | EGR2.01     | 0.68 | 0 | 0 | M | general GO       |
| Wnt_receptor_signaling_pathway (66)         | EGR1.01     | 0.67 | H | M | 0 | general GO       |
| Wnt_receptor_signaling_pathway (66)         | CDE.01      | 0.6  | H | M | H | general GO       |
| Wnt_receptor_signaling_pathway (66)         | PAX5.01     | 0.57 | 0 |   | 0 | general GO       |
| visual_perception (142)                     | HOX_PBX_0   | 0.48 |   | 0 | 0 | general GO       |
| visual_perception (142)                     | PTX1.01     | 0.45 |   | H | 0 | general GO       |
| visual_perception (142)                     | CRX.01      | 0.39 |   | 0 | 0 | general GO       |
| visual_perception (142)                     | OTX2.01     | 0.39 |   | H | 0 | general GO       |
| visual_perception (142)                     | CDX2.01     | 0.38 | M | H | 0 | general GO       |
| visual_perception (142)                     | SIX3.01     | 0.35 |   | H | H | general GO       |
| visual_perception (142)                     | EVH1.04     | 0.33 | M | H | 0 | general GO       |
| ubiquitin_dependent_protein_catabolism (72) | WHN.01      | 0.59 |   | 0 | 0 | general GO       |

|                                                  |            |      |   |   |   |   |            |
|--------------------------------------------------|------------|------|---|---|---|---|------------|
| ubiquitin_cycle (154)                            | GC_rich    | 0.99 |   | 0 | 0 | 0 | general GO |
| ubiquitin_cycle (154)                            | HES1.01    | 0.62 |   | 0 | 0 | 0 | general GO |
| ubiquitin_cycle (154)                            | MUSCLE_IN  | 0.62 |   | 0 | 0 | 0 | general GO |
| ubiquitin_cycle (154)                            | CDE.01     | 0.6  |   | H | H | 0 | general GO |
| ubiquitin_cycle (154)                            | FLI.01     | 0.53 |   | H | 0 | 0 | general GO |
| transport (940)                                  | XBP1.01    | 0.47 | H | M | 0 | 0 | general GO |
| transport (940)                                  | OTX2.01    | 0.39 | M | 0 | 0 | H | general GO |
| transport (940)                                  | HNF1.03    | 0.31 |   | 0 | 0 | 0 | general GO |
| transport (940)                                  | HNF1.01    | 0.3  |   | 0 | 0 | 0 | general GO |
| transmembrane_receptor_tyrosine_kinase_signaling | GAGA.01    | 0.56 | H | M | 0 | 0 | general GO |
| transcription_RNA_polyll_promoter (190)          | GC_rich    | 0.99 | H |   | 0 | 0 | general GO |
| transcription_RNA_polyll_promoter (190)          | poly_C     | 0.99 | 0 |   | 0 | 0 | general GO |
| transcription_RNA_polyll_promoter (190)          | SP1.01     | 0.78 | 0 |   | 0 | 0 | general GO |
| transcription_RNA_polyll_promoter (190)          | WT1.01     | 0.77 | 0 |   | 0 | 0 | general GO |
| transcription_RNA_polyll_promoter (190)          | ZNF202.01  | 0.73 | 0 |   | 0 | 0 | general GO |
| transcription_RNA_polyll_promoter (190)          | AP2.01     | 0.73 | 0 | H |   | H | general GO |
| transcription_RNA_polyll_promoter (190)          | EGR3.01    | 0.71 | 0 | M | H | 0 | general GO |
| transcription_RNA_polyll_promoter (190)          | NRF1_01    | 0.71 | 0 |   | 0 | 0 | general GO |
| transcription_RNA_polyll_promoter (190)          | HIC1_01    | 0.68 | 0 | 0 | 0 |   | general GO |
| transcription_RNA_polyll_promoter (190)          | MTF-1.01   | 0.65 | 0 |   | 0 | 0 | general GO |
| transcription_RNA_polyll_promoter (190)          | PLAG1_01   | 0.63 | M | H | 0 | H | general GO |
| transcription_RNA_polyll_promoter (190)          | CDE.01     | 0.6  | 0 | H | M |   | general GO |
| synaptic_transmission (153)                      | NRSE.01    | 0.57 | H |   | 0 | 0 | general GO |
| synaptic_transmission (153)                      | GAGA.01    | 0.56 | 0 | 0 | M | H | general GO |
| synaptic_transmission (153)                      | ISL1.01    | 0.43 | H | M | 0 | 0 | general GO |
| steroid_biosynthesis (42)                        | NFY.01     | 0.52 | M | H | 0 | 0 | general GO |
| steroid_biosynthesis (42)                        | CAAT.01    | 0.49 | M | H | 0 | 0 | general GO |
| steroid_biosynthesis (42)                        | NFY.03     | 0.47 | M |   | 0 | 0 | general GO |
| sodium_ion_transport (75)                        | FXRE.01    | 0.51 | 0 | M | H | 0 | general GO |
| sodium_ion_transport (75)                        | HNF1.03    | 0.31 | H | M | 0 | 0 | general GO |
| sodium_ion_transport (75)                        | HNF1.01    | 0.3  | H | M | 0 | 0 | general GO |
| small_GTPase_mediated_signal_transduction (124)  | GC_rich    | 0.99 |   | H | 0 | 0 | general GO |
| small_GTPase_mediated_signal_transduction (124)  | SP1.01     | 0.78 |   | H | H | 0 | general GO |
| small_GTPase_mediated_signal_transduction (124)  | WT1.01     | 0.77 |   | H | H | 0 | general GO |
| small_GTPase_mediated_signal_transduction (124)  | ZF5.01     | 0.72 |   | H | 0 | H | general GO |
| small_GTPase_mediated_signal_transduction (124)  | ZF9.01     | 0.72 |   | H | H | 0 | general GO |
| small_GTPase_mediated_signal_transduction (124)  | EGR3.01    | 0.71 | H | 0 | H | M | general GO |
| small_GTPase_mediated_signal_transduction (124)  | NRF1_01    | 0.71 |   | H | 0 | 0 | general GO |
| small_GTPase_mediated_signal_transduction (124)  | NGFIC.01   | 0.69 |   | 0 | 0 | 0 | general GO |
| small_GTPase_mediated_signal_transduction (124)  | EGR1.02    | 0.68 |   | H | 0 | 0 | general GO |
| small_GTPase_mediated_signal_transduction (124)  | EGR2.01    | 0.68 | H | 0 | 0 | M | general GO |
| small_GTPase_mediated_signal_transduction (124)  | GC.01      | 0.68 |   | H | 0 | 0 | general GO |
| small_GTPase_mediated_signal_transduction (124)  | PLAG1_01   | 0.63 |   | 0 | 0 | 0 | general GO |
| skeletal_development (83)                        | GAGA.01    | 0.56 | H |   | H | 0 | general GO |
| signal_transduction (1189)                       | NFKAPPAB.0 | 0.57 |   | 0 | 0 | 0 | general GO |
| signal_transduction (1189)                       | HIVEP1_01  | 0.52 | H | M | 0 | 0 | general GO |
| signal_transduction (1189)                       | MEL1_02    | 0.46 |   | 0 | 0 | 0 | general GO |
| signal_transduction (1189)                       | AARE.01    | 0.39 |   | 0 | 0 | 0 | general GO |
| signal_transduction (1189)                       | EV1i.02    | 0.33 |   | 0 | 0 | 0 | general GO |
| signal_transduction (1189)                       | EV1i.01    | 0.31 |   | 0 | 0 | 0 | general GO |
| signal_transduction (1189)                       | poly_A     | 0.01 |   | 0 | 0 | 0 | general GO |
| sensory_perception_of_smell (40)                 | NFE2L2.01  | 0.47 | M | H | 0 | 0 | general GO |
| sensory_perception_of_smell (40)                 | LHX3.01    | 0.14 | H |   | H | H | general GO |
| sensory_perception (201)                         | NFKAPPAB.0 | 0.57 | H | M | 0 | 0 | general GO |
| sensory_perception (201)                         | IK2.01     | 0.49 |   | 0 | 0 | 0 | general GO |
| sensory_perception (201)                         | SRF.03     | 0.47 |   | H | 0 | 0 | general GO |
| sensory_perception (201)                         | MIT.01     | 0.46 |   | H | H | 0 | general GO |
| sensory_perception (201)                         | MEL1_03    | 0.46 |   |   | 0 | 0 | general GO |
| sensory_perception (201)                         | DBP.01     | 0.45 |   | H | H | 0 | general GO |
| sensory_perception (201)                         | GATA1.01   | 0.45 |   | 0 | 0 | 0 | general GO |
| sensory_perception (201)                         | PBX1_MEIS1 | 0.44 | 0 | 0 | M | H | general GO |
| sensory_perception (201)                         | TGIF.01    | 0.44 |   | 0 | 0 | 0 | general GO |
| sensory_perception (201)                         | SRF.01     | 0.42 |   | H | 0 | 0 | general GO |
| sensory_perception (201)                         | RORA1.01   | 0.41 |   | H | 0 | 0 | general GO |

|                                                    |           |      |   |   |   |   |            |
|----------------------------------------------------|-----------|------|---|---|---|---|------------|
| sensory_perception (201)                           | GF11.01   | 0.41 |   | H | 0 | 0 | general GO |
| sensory_perception (201)                           | CRX.01    | 0.39 |   | H | 0 | 0 | general GO |
| sensory_perception (201)                           | AARE.01   | 0.39 | H | H | M | 0 | general GO |
| sensory_perception (201)                           | AIRE.01   | 0.39 |   | H | H | 0 | general GO |
| sensory_perception (201)                           | LTATA_01  | 0.39 |   | H | 0 | 0 | general GO |
| sensory_perception (201)                           | OTX2.01   | 0.39 |   | H | 0 | 0 | general GO |
| sensory_perception (201)                           | GATA1.03  | 0.39 |   | H | H | 0 | general GO |
| sensory_perception (201)                           | NFAT.01   | 0.38 |   | 0 | 0 | 0 | general GO |
| sensory_perception (201)                           | CDX2.01   | 0.38 |   | H | H | 0 | general GO |
| sensory_perception (201)                           | GATA2.02  | 0.36 |   | H | H | 0 | general GO |
| sensory_perception (201)                           | XFD3.01   | 0.36 |   | 0 | 0 | H | general GO |
| sensory_perception (201)                           | OCT1P.01  | 0.36 |   |   | H | 0 | general GO |
| sensory_perception (201)                           | SIX3.01   | 0.35 |   | H | 0 | 0 | general GO |
| sensory_perception (201)                           | PDX1_G_SA | 0.35 |   | H | H | H | general GO |
| sensory_perception (201)                           | GATA2.01  | 0.35 |   | H | H | 0 | general GO |
| sensory_perception (201)                           | NKX25.02  | 0.35 |   | H | 0 | 0 | general GO |
| sensory_perception (201)                           | FREAC2.01 | 0.35 | 0 | M | H | 0 | general GO |
| sensory_perception (201)                           | GATA3.01  | 0.34 |   | H | H | 0 | general GO |
| sensory_perception (201)                           | XFD2.01   | 0.32 | H |   | H | H | general GO |
| sensory_perception (201)                           | HNF1.03   | 0.31 |   | H | 0 | 0 | general GO |
| sensory_perception (201)                           | PBX1.01   | 0.31 | H |   | H | 0 | general GO |
| sensory_perception (201)                           | XVENT2.01 | 0.3  |   | H | 0 | H | general GO |
| sensory_perception (201)                           | MEF2.02   | 0.3  |   | H | 0 | 0 | general GO |
| sensory_perception (201)                           | MEL1_01   | 0.29 |   | H | H | 0 | general GO |
| sensory_perception (201)                           | GATA3.02  | 0.29 |   | H | H | 0 | general GO |
| sensory_perception (201)                           | EV11.05   | 0.29 |   | H | H | 0 | general GO |
| sensory_perception (201)                           | TATA.01   | 0.28 |   | H | 0 | 0 | general GO |
| sensory_perception (201)                           | TATA.02   | 0.28 |   | H | 0 | 0 | general GO |
| sensory_perception (201)                           | HFH8.01   | 0.27 | H | H |   | 0 | general GO |
| sensory_perception (201)                           | OCT1.01   | 0.26 | H | H |   | 0 | general GO |
| sensory_perception (201)                           | HNF3B.01  | 0.26 |   | H | H | 0 | general GO |
| sensory_perception (201)                           | HFH2.01   | 0.25 | H | H |   | 0 | general GO |
| sensory_perception (201)                           | EV11.03   | 0.24 |   | H | H | 0 | general GO |
| response_to_virus (55)                             | ISRE.01   | 0.43 |   |   | 0 | 0 | general GO |
| response_to_virus (55)                             | IRF2.01   | 0.43 |   |   | 0 | 0 | general GO |
| response_to_virus (55)                             | IRF3.01   | 0.42 |   |   | 0 | 0 | general GO |
| response_to_virus (55)                             | PRDM1.01  | 0.41 | 0 |   | 0 | 0 | general GO |
| response_to_virus (55)                             | HBP1_01   | 0.41 | M | H | 0 | 0 | general GO |
| response_to_virus (55)                             | IRF1.01   | 0.4  |   |   | H | 0 | general GO |
| response_to_virus (55)                             | BRN2.01   | 0.39 |   | 0 | H | H | general GO |
| response_to_virus (55)                             | STAT5.01  | 0.39 | H | 0 | M | 0 | general GO |
| response_to_virus (55)                             | IRF7.01   | 0.36 |   | H | 0 | 0 | general GO |
| response_to_virus (55)                             | TATA.01   | 0.28 |   | H | H | 0 | general GO |
| response_to_unfolded_protein (40)                  | STAT1.01  | 0.52 | 0 |   | 0 | 0 | general GO |
| response_to_DNA_damage_stimulus (117)              | E2F.02    | 0.59 |   | M | 0 | 0 | general GO |
| response_to_DNA_damage_stimulus (117)              | E2F.03    | 0.54 | H | M | 0 | M | general GO |
| response_to_DNA_damage_stimulus (117)              | FLI.01    | 0.53 |   | 0 | 0 | 0 | general GO |
| response_to_DNA_damage_stimulus (117)              | E2F.01    | 0.5  | H | M | 0 | 0 | general GO |
| regulation_of_transcription_from_RNA_polymerase    | WT1.01    | 0.77 | H |   | 0 | 0 | general GO |
| regulation_of_transcription_from_RNA_polymerase    | ZF5.01    | 0.72 | H | H | 0 | M | general GO |
| regulation_of_transcription_from_RNA_polymerase    | MAZ.01    | 0.65 |   | H | M | 0 | general GO |
| regulation_of_transcription_from_RNA_polymerase    | PLAG1_01  | 0.63 | 0 |   | 0 | 0 | general GO |
| regulation_of_transcription_from_RNA_polymerase    | HES1.01   | 0.62 | H | 0 | 0 | M | general GO |
| regulation_of_progression_through_cell_cycle (217) | GC_rich   | 0.99 | H | M | 0 | 0 | general GO |
| regulation_of_progression_through_cell_cycle (217) | ZF5.01    | 0.72 | H | M | H | 0 | general GO |
| regulation_of_progression_through_cell_cycle (217) | CREB.03   | 0.54 | H | M | 0 | 0 | general GO |
| regulation_of_cyclin_dependent_protein_kinase_acti | ZF9.01    | 0.72 | 0 | 0 |   | 0 | general GO |
| regulation_of_cyclin_dependent_protein_kinase_acti | NFY.01    | 0.52 | 0 | H | M | 0 | general GO |
| regulation_of_apoptosis (59)                       | IRF3.01   | 0.42 | M | H | 0 | 0 | general GO |
| proteolysis (297)                                  | NRL.01    | 0.51 | 0 | 0 | H | M | general GO |
| proteolysis (297)                                  | AREB6.01  | 0.49 |   | 0 | 0 | H | general GO |
| proteolysis (297)                                  | AREB6.02  | 0.48 |   | 0 | 0 | 0 | general GO |
| proteolysis (297)                                  | AP1.01    | 0.43 |   | 0 | 0 | 0 | general GO |
| proteolysis (297)                                  | IRF4.01   | 0.39 |   | H | 0 | 0 | general GO |

|                                                 |             |      |   |   |   |   |            |
|-------------------------------------------------|-------------|------|---|---|---|---|------------|
| proteolysis (297)                               | GATA1.03    | 0.39 | 0 | H | 0 | M | general GO |
| proteolysis (297)                               | HNF1.02     | 0.34 |   | 0 | 0 | 0 | general GO |
| proteolysis (297)                               | ATBF1.01    | 0.34 |   | 0 | 0 | 0 | general GO |
| proteolysis (297)                               | HNF1.03     | 0.31 |   | 0 | 0 | 0 | general GO |
| proteolysis (297)                               | HNF1.01     | 0.3  |   | 0 | 0 | 0 | general GO |
| proteolysis (297)                               | HFH1.01     | 0.27 |   | 0 | 0 | 0 | general GO |
| proteolysis (297)                               | MYT1.01     | 0.27 |   | 0 | 0 | 0 | general GO |
| protein_transport (254)                         | GC_rich     | 0.99 |   | 0 | 0 | 0 | general GO |
| protein_transport (254)                         | ZF5.01      | 0.72 |   | H | 0 | 0 | general GO |
| protein_transport (254)                         | EGR3.01     | 0.71 |   | 0 | 0 | 0 | general GO |
| protein_transport (254)                         | NRF1_01     | 0.71 |   | H | 0 | 0 | general GO |
| protein_transport (254)                         | EGR1.02     | 0.68 |   | 0 | 0 | 0 | general GO |
| protein_transport (254)                         | AHRARNT.0   | 0.62 | M | H | 0 | 0 | general GO |
| protein_transport (254)                         | MUSCLE_IN   | 0.62 |   | 0 | 0 | 0 | general GO |
| protein_transport (254)                         | GABP.01     | 0.62 |   | 0 | 0 | 0 | general GO |
| protein_transport (254)                         | NRF2.01     | 0.57 |   | 0 | 0 | 0 | general GO |
| protein_transport (254)                         | CREB.02     | 0.56 |   | 0 | 0 | 0 | general GO |
| protein_transport (254)                         | ATF.01      | 0.55 | H | M | 0 | 0 | general GO |
| protein_targeting (37)                          | NRF2.01     | 0.57 |   | 0 | 0 | 0 | general GO |
| protein_targeting (37)                          | FLI.01      | 0.53 |   | 0 | 0 | 0 | general GO |
| protein_folding (149)                           | ELK1.02     | 0.55 | H | M | 0 | 0 | general GO |
| protein_folding (149)                           | FLI.01      | 0.53 | H |   | H | 0 | general GO |
| protein_complex_assembly (94)                   | P53.01      | 0.61 | 0 | 0 | 0 |   | general GO |
| protein_biosynthesis (197)                      | GABP.01     | 0.62 |   | 0 | 0 | 0 | general GO |
| protein_biosynthesis (197)                      | CDE.01      | 0.6  |   | H | H | H | general GO |
| protein_biosynthesis (197)                      | WHN.01      | 0.59 | H |   | H | 0 | general GO |
| protein_biosynthesis (197)                      | NRF2.01     | 0.57 |   | M | 0 | 0 | general GO |
| protein_biosynthesis (197)                      | ATF.01      | 0.55 | H | M | 0 | 0 | general GO |
| protein_biosynthesis (197)                      | CETS1P54.0  | 0.55 |   | M | 0 | 0 | general GO |
| protein_biosynthesis (197)                      | YY1.01      | 0.55 |   | H | 0 | 0 | general GO |
| protein_biosynthesis (197)                      | ELK1.02     | 0.55 |   | H | 0 | 0 | general GO |
| protein_biosynthesis (197)                      | NUDR.01     | 0.54 | H |   | 0 | 0 | general GO |
| protein_biosynthesis (197)                      | E2F.03      | 0.54 | H |   | H | 0 | general GO |
| protein_biosynthesis (197)                      | FLI.01      | 0.53 |   | H | 0 | 0 | general GO |
| protein_biosynthesis (197)                      | ELK1.01     | 0.52 |   | 0 | 0 | 0 | general GO |
| protein_biosynthesis (197)                      | E2F.01      | 0.5  |   | 0 | 0 | 0 | general GO |
| protein_biosynthesis (197)                      | ISRE.01     | 0.43 |   | 0 | 0 | 0 | general GO |
| protein_amino_acid_phosphorylation (373)        | SP1.01      | 0.78 | H | H |   | 0 | general GO |
| protein_amino_acid_phosphorylation (373)        | ZF9.01      | 0.72 | H | H |   | H | general GO |
| protein_amino_acid_phosphorylation (373)        | PAX9.01     | 0.57 | 0 |   | 0 | 0 | general GO |
| protein_amino_acid_dephosphorylation (96)       | MUSCLE_IN   | 0.61 | M | 0 | H | 0 | general GO |
| pregnancy (41)                                  | XVENT2.01   | 0.3  | H | 0 | 0 | M | general GO |
| pregnancy (41)                                  | CDP.02      | 0.29 | M | 0 | 0 | H | general GO |
| potassium_ion_transport (108)                   | poly_C      | 0.99 |   |   |   |   | general GO |
| potassium_ion_transport (108)                   | SP1.01      | 0.78 | 0 | H | M | 0 | general GO |
| potassium_ion_transport (108)                   | NGFIC.01    | 0.69 | 0 | M | 0 | H | general GO |
| potassium_ion_transport (108)                   | EGR2.01     | 0.68 | 0 | 0 | 0 |   | general GO |
| potassium_ion_transport (108)                   | INSM1_01    | 0.63 | 0 | M | 0 | H | general GO |
| positive_regulation_of_I_kappaB_kinase_NF_kappa | ETS1.01     | 0.52 | H | 0 | 0 | M | general GO |
| positive_regulation_of_I_kappaB_kinase_NF_kappa | IRF3.01     | 0.42 |   | 0 | 0 | 0 | general GO |
| positive_regulation_of_cell_proliferation (103) | HEN1.02     | 0.66 | 0 | M | H | 0 | general GO |
| organ_morphogenesis (71)                        | GAGA.01     | 0.56 | 0 | H | M | 0 | general GO |
| nucleosome_assembly (71)                        | NFY.02      | 0.48 | H |   | H | 0 | general GO |
| nucleosome_assembly (71)                        | TATA.01     | 0.28 |   | H | 0 | 0 | general GO |
| nuclear_mRNA_splicing_via_spliceosome (94)      | NRF2.01     | 0.57 |   | H | 0 | 0 | general GO |
| nervous_system_development (225)                | ZNF202.01   | 0.73 | H | H | H |   | general GO |
| nervous_system_development (225)                | GAGA.01     | 0.56 |   | H | H | H | general GO |
| nervous_system_development (225)                | AG_rich_cod | 0.5  |   | H | 0 | 0 | general GO |
| muscle_development (107)                        | INSM1_01    | 0.63 |   | 0 | 0 | 0 | general GO |
| muscle_development (107)                        | SRF.02      | 0.49 |   | H | 0 | 0 | general GO |
| muscle_development (107)                        | MTATA.01    | 0.47 |   | 0 | 0 | 0 | general GO |
| muscle_development (107)                        | SRF.03      | 0.47 | H |   | 0 | 0 | general GO |
| muscle_development (107)                        | AMEF2.01    | 0.38 | M | H | 0 | 0 | general GO |
| muscle_development (107)                        | MEF2.02     | 0.3  | H |   | 0 | 0 | general GO |

|                                       |            |      |   |   |   |   |            |
|---------------------------------------|------------|------|---|---|---|---|------------|
| muscle_development (107)              | RSRFC4.01  | 0.28 | H | 0 | 0 | 0 | general GO |
| mRNA_processing (148)                 | NRF1_01    | 0.71 | H | M | 0 | 0 | general GO |
| mRNA_processing (148)                 | E2F.02     | 0.59 | H | 0 | 0 | 0 | general GO |
| morphogenesis (104)                   | WT1.01     | 0.77 | 0 | H | H |   | general GO |
| morphogenesis (104)                   | AP2.01     | 0.73 | 0 | H | 0 |   | general GO |
| morphogenesis (104)                   | EGR1.02    | 0.68 | H | 0 | M | H | general GO |
| morphogenesis (104)                   | MUSCLE_IN  | 0.61 | 0 | H | H | M | general GO |
| mitosis (86)                          | CDE.01     | 0.6  | M | H | 0 | 0 | general GO |
| mitosis (86)                          | WHN.01     | 0.59 | 0 |   | 0 | 0 | general GO |
| mitosis (86)                          | NFY.01     | 0.52 |   |   | 0 | 0 | general GO |
| mitosis (86)                          | CAAT.01    | 0.49 |   |   | 0 | 0 | general GO |
| mitosis (86)                          | NFY.02     | 0.48 |   | 0 | 0 | 0 | general GO |
| mitosis (86)                          | CHR.01     | 0.41 |   | 0 | 0 | 0 | general GO |
| metabolism (241)                      | NFY.02     | 0.48 |   | 0 | 0 | 0 | general GO |
| metabolism (241)                      | E4BP4.01   | 0.34 | M | H | 0 | 0 | general GO |
| metabolism (241)                      | GATA3.02   | 0.29 | 0 | M | 0 | H | general GO |
| lipid_transport (41)                  | SRF.03     | 0.47 |   | 0 | 0 | 0 | general GO |
| lipid_transport (41)                  | RORA1.01   | 0.41 |   | 0 | 0 | 0 | general GO |
| lipid_catabolism (41)                 | RORA1.01   | 0.41 | 0 | 0 | H | M | general GO |
| lipid_biosynthesis (54)               | CAAT.01    | 0.49 | M | H | 0 | 0 | general GO |
| lipid_biosynthesis (54)               | NFY.02     | 0.48 | M | H | 0 | 0 | general GO |
| lipid_biosynthesis (54)               | NFY.03     | 0.47 | M | H | 0 | 0 | general GO |
| ion_transport (329)                   | NRSE.01    | 0.57 | M | 0 | 0 | H | general GO |
| intracellular_protein_transport (191) | GC_rich    | 0.99 |   | H | 0 | 0 | general GO |
| intracellular_protein_transport (191) | NRF1_01    | 0.71 |   | H | 0 | 0 | general GO |
| intracellular_protein_transport (191) | ATF6.02    | 0.6  |   | 0 | 0 | 0 | general GO |
| intracellular_protein_transport (191) | CDE.01     | 0.6  |   | H | 0 | 0 | general GO |
| intracellular_protein_transport (191) | AHR.01     | 0.59 | M | H | 0 | 0 | general GO |
| intracellular_protein_transport (191) | ATF.01     | 0.55 | H | M | 0 | 0 | general GO |
| intracellular_protein_transport (191) | XBP1.01    | 0.47 |   | 0 | 0 | H | general GO |
| innate_immune_response (46)           | PAX2.01    | 0.47 |   | 0 | 0 | 0 | general GO |
| innate_immune_response (46)           | TST1.01    | 0.43 |   | 0 | 0 | 0 | general GO |
| innate_immune_response (46)           | ISL1.01    | 0.43 | H | M | 0 | 0 | general GO |
| innate_immune_response (46)           | IRF2.01    | 0.43 |   | 0 | 0 | 0 | general GO |
| innate_immune_response (46)           | IRF3.01    | 0.42 |   | 0 | 0 | 0 | general GO |
| innate_immune_response (46)           | PSE_02     | 0.41 |   | H | H | 0 | general GO |
| innate_immune_response (46)           | BRN4.01    | 0.4  |   | H | 0 | 0 | general GO |
| innate_immune_response (46)           | CEBPB.01   | 0.4  |   | H | H | 0 | general GO |
| innate_immune_response (46)           | OCT1.04    | 0.38 | M | 0 | H | 0 | general GO |
| innate_immune_response (46)           | CDX2.01    | 0.38 |   | 0 | 0 | H | general GO |
| innate_immune_response (46)           | IRF7.01    | 0.36 |   | 0 | 0 | 0 | general GO |
| innate_immune_response (46)           | OCT.01     | 0.35 |   | 0 | H | 0 | general GO |
| innate_immune_response (46)           | OCT1.02    | 0.34 |   | 0 | 0 | 0 | general GO |
| innate_immune_response (46)           | XFD1.01    | 0.34 |   | H | 0 | 0 | general GO |
| innate_immune_response (46)           | ATBF1.01   | 0.34 |   | 0 | 0 | 0 | general GO |
| innate_immune_response (46)           | XFD2.01    | 0.32 |   | H | H | 0 | general GO |
| innate_immune_response (46)           | LMX1B.01   | 0.32 |   | H | 0 | 0 | general GO |
| innate_immune_response (46)           | EN1.01     | 0.32 |   | H | 0 | 0 | general GO |
| innate_immune_response (46)           | BRN3.01    | 0.3  |   | 0 | 0 | 0 | general GO |
| innate_immune_response (46)           | MEF2.03    | 0.3  | M | H | 0 | 0 | general GO |
| innate_immune_response (46)           | HNF1.01    | 0.3  |   | 0 | 0 | 0 | general GO |
| innate_immune_response (46)           | GATA3.02   | 0.29 | 0 | M | H | 0 | general GO |
| innate_immune_response (46)           | PIT1.01    | 0.27 |   | 0 |   | 0 | general GO |
| innate_immune_response (46)           | SATB1.01   | 0.27 |   | 0 | 0 | H | general GO |
| innate_immune_response (46)           | HFH8.01    | 0.27 | M | H | 0 | 0 | general GO |
| innate_immune_response (46)           | OCT1.01    | 0.26 |   | 0 | 0 | 0 | general GO |
| innate_immune_response (46)           | NKX31.01   | 0.25 | M | 0 | 0 | H | general GO |
| innate_immune_response (46)           | OCT1.06    | 0.22 |   | 0 | 0 | 0 | general GO |
| inflammatory_response (163)           | NFKAPPAB.0 | 0.6  |   |   | 0 | 0 | general GO |
| inflammatory_response (163)           | NFKAPPAB.0 | 0.57 | H |   | 0 | 0 | general GO |
| inflammatory_response (163)           | NFKAPPAB6  | 0.55 |   | M | 0 | 0 | general GO |
| inflammatory_response (163)           | CREL.01    | 0.55 |   | M | 0 | 0 | general GO |
| inflammatory_response (163)           | NFKAPPAB.0 | 0.55 |   |   | 0 | 0 | general GO |
| inflammatory_response (163)           | HIVEP1_01  | 0.52 |   |   | 0 | 0 | general GO |

|                             |           |      |   |   |   |   |            |
|-----------------------------|-----------|------|---|---|---|---|------------|
| inflammatory_response (163) | TH1E47.01 | 0.51 |   | 0 | 0 | 0 | general GO |
| inflammatory_response (163) | ETS2.01   | 0.48 | H |   | 0 | 0 | general GO |
| inflammatory_response (163) | GRE.01    | 0.47 |   | H | 0 | 0 | general GO |
| inflammatory_response (163) | NFE2L2.01 | 0.47 |   | 0 | 0 | 0 | general GO |
| inflammatory_response (163) | RP58.01   | 0.46 |   | 0 | 0 | 0 | general GO |
| inflammatory_response (163) | CEBP.02   | 0.46 | M |   | 0 | 0 | general GO |
| inflammatory_response (163) | COMP1.01  | 0.45 |   | H | 0 | 0 | general GO |
| inflammatory_response (163) | BARBIE.01 | 0.45 |   | 0 | 0 | 0 | general GO |
| inflammatory_response (163) | GATA1.01  | 0.45 |   | M | 0 | 0 | general GO |
| inflammatory_response (163) | MYT1L.01  | 0.44 |   | 0 | 0 | 0 | general GO |
| inflammatory_response (163) | TCF11MAFG | 0.43 |   | 0 | H | 0 | general GO |
| inflammatory_response (163) | AP1.01    | 0.43 |   | H | 0 | 0 | general GO |
| inflammatory_response (163) | ISL1.01   | 0.43 | M | H | H | 0 | general GO |
| inflammatory_response (163) | ISRE.01   | 0.43 |   | 0 | 0 | 0 | general GO |
| inflammatory_response (163) | IRF3.01   | 0.42 |   | 0 | 0 | 0 | general GO |
| inflammatory_response (163) | SRF.01    | 0.42 |   | 0 | 0 | 0 | general GO |
| inflammatory_response (163) | PRDM1.01  | 0.41 |   | H | 0 | 0 | general GO |
| inflammatory_response (163) | HMG1Y.01  | 0.41 |   | H | H | 0 | general GO |
| inflammatory_response (163) | PDX1_Gabi | 0.41 | M | 0 | H | 0 | general GO |
| inflammatory_response (163) | GATA.01   | 0.41 | M | H | 0 | 0 | general GO |
| inflammatory_response (163) | HBP1_01   | 0.41 | H | H | 0 | M | general GO |
| inflammatory_response (163) | PSE_02    | 0.41 | H | M | 0 | 0 | general GO |
| inflammatory_response (163) | BRN4.01   | 0.4  |   | H | 0 | 0 | general GO |
| inflammatory_response (163) | IRF1.01   | 0.4  |   | M | 0 | 0 | general GO |
| inflammatory_response (163) | CEBPB.01  | 0.4  |   | H | 0 | 0 | general GO |
| inflammatory_response (163) | AARE.01   | 0.39 |   | 0 | 0 | 0 | general GO |
| inflammatory_response (163) | AIRE.01   | 0.39 |   | H | 0 | 0 | general GO |
| inflammatory_response (163) | LTATA_01  | 0.39 |   | H | 0 | 0 | general GO |
| inflammatory_response (163) | BRN2.01   | 0.39 |   | M | 0 | 0 | general GO |
| inflammatory_response (163) | IRF4.01   | 0.39 |   |   | 0 | 0 | general GO |
| inflammatory_response (163) | STAT5.01  | 0.39 |   | H | 0 | 0 | general GO |
| inflammatory_response (163) | GATA1.03  | 0.39 | M |   | H | 0 | general GO |
| inflammatory_response (163) | BCL6.01   | 0.39 |   | H | M | 0 | general GO |
| inflammatory_response (163) | AMEF2.01  | 0.38 |   | H | 0 | 0 | general GO |
| inflammatory_response (163) | NFAT.01   | 0.38 |   | 0 | 0 | 0 | general GO |
| inflammatory_response (163) | CDX2.01   | 0.38 | H |   | H | 0 | general GO |
| inflammatory_response (163) | MMEF2.01  | 0.37 |   | H | 0 | 0 | general GO |
| inflammatory_response (163) | SOX9.01   | 0.37 | 0 | 0 |   | 0 | general GO |
| inflammatory_response (163) | XFD3.01   | 0.36 |   | 0 | 0 | 0 | general GO |
| inflammatory_response (163) | IRF7.01   | 0.36 |   | H | 0 | 0 | general GO |
| inflammatory_response (163) | OCT1P.01  | 0.36 | H |   | 0 | 0 | general GO |
| inflammatory_response (163) | CDX1.01   | 0.35 |   | H | 0 | 0 | general GO |
| inflammatory_response (163) | DLX3.01   | 0.34 | 0 |   | 0 | 0 | general GO |
| inflammatory_response (163) | HOXC13_01 | 0.34 | M | H | H | 0 | general GO |
| inflammatory_response (163) | HNF1.02   | 0.34 |   | 0 | 0 | 0 | general GO |
| inflammatory_response (163) | XFD1.01   | 0.34 |   | H | 0 | 0 | general GO |
| inflammatory_response (163) | ATBF1.01  | 0.34 | M | H | H | 0 | general GO |
| inflammatory_response (163) | GATA3.01  | 0.34 |   | H | H | 0 | general GO |
| inflammatory_response (163) | EV11.04   | 0.33 |   | M | 0 | 0 | general GO |
| inflammatory_response (163) | MEIS1_HOX | 0.33 | H | M | H | 0 | general GO |
| inflammatory_response (163) | PBX_HOXA9 | 0.33 | H | M | H | 0 | general GO |
| inflammatory_response (163) | BRN3.02   | 0.33 |   | 0 | 0 | 0 | general GO |
| inflammatory_response (163) | BRN2.03   | 0.32 | H |   | 0 | 0 | general GO |
| inflammatory_response (163) | XFD2.01   | 0.32 |   |   | 0 | 0 | general GO |
| inflammatory_response (163) | OC2.01    | 0.32 | 0 |   | 0 | 0 | general GO |
| inflammatory_response (163) | LMX1B.01  | 0.32 |   | H | 0 | 0 | general GO |
| inflammatory_response (163) | HNF1.03   | 0.31 |   | 0 | 0 | 0 | general GO |
| inflammatory_response (163) | EV11.01   | 0.31 |   | 0 | H | 0 | general GO |
| inflammatory_response (163) | HNF6.01   | 0.31 | M | H | H | 0 | general GO |
| inflammatory_response (163) | BRN3.01   | 0.3  |   | H | 0 | 0 | general GO |
| inflammatory_response (163) | ATATA.01  | 0.3  |   | 0 | 0 | 0 | general GO |
| inflammatory_response (163) | MEF2.02   | 0.3  |   | H | H | 0 | general GO |
| inflammatory_response (163) | MEF2.03   | 0.3  |   | H | H | 0 | general GO |
| inflammatory_response (163) | HNF1.01   | 0.3  |   | 0 | 0 | 0 | general GO |

|                             |            |      |   |   |   |   |            |
|-----------------------------|------------|------|---|---|---|---|------------|
| inflammatory_response (163) | MEF2.05    | 0.29 |   | 0 | H | 0 | general GO |
| inflammatory_response (163) | RSRFC4.02  | 0.29 |   |   | M | 0 | general GO |
| inflammatory_response (163) | MEL1_01    | 0.29 | M |   | H | 0 | general GO |
| inflammatory_response (163) | EVH1.05    | 0.29 | 0 |   | 0 | 0 | general GO |
| inflammatory_response (163) | TATA.01    | 0.28 |   | 0 | 0 | 0 | general GO |
| inflammatory_response (163) | TATA.02    | 0.28 |   | 0 | 0 | 0 | general GO |
| inflammatory_response (163) | MYT1.02    | 0.28 |   | H | 0 | 0 | general GO |
| inflammatory_response (163) | PIT1.01    | 0.27 |   | H | 0 | 0 | general GO |
| inflammatory_response (163) | FREAC7.01  | 0.27 |   | H | 0 | 0 | general GO |
| inflammatory_response (163) | HFH1.01    | 0.27 |   | H | 0 | 0 | general GO |
| inflammatory_response (163) | MYT1.01    | 0.27 |   | H | 0 | 0 | general GO |
| inflammatory_response (163) | OCT1.01    | 0.26 |   | H | M | 0 | general GO |
| inflammatory_response (163) | BRN5.01    | 0.26 |   | 0 | 0 | 0 | general GO |
| inflammatory_response (163) | HNF3B.01   | 0.26 |   | 0 | 0 | 0 | general GO |
| inflammatory_response (163) | BRN2.02    | 0.25 | H |   | 0 | 0 | general GO |
| inflammatory_response (163) | EVH1.03    | 0.24 | M |   | H | 0 | general GO |
| inflammatory_response (163) | OCT1.06    | 0.22 | H | H |   | 0 | general GO |
| induction_of_apoptosis (86) | ISRE.01    | 0.43 | H | 0 | 0 | M | general GO |
| immune_response (366)       | NFKAPPAB.0 | 0.6  |   | H | 0 | 0 | general GO |
| immune_response (366)       | NFKAPPAB.0 | 0.57 |   | H | 0 | 0 | general GO |
| immune_response (366)       | NFKAPPAB6  | 0.55 |   |   | H | 0 | general GO |
| immune_response (366)       | CREL.01    | 0.55 |   |   | H | 0 | general GO |
| immune_response (366)       | NFKAPPAB.0 | 0.55 |   | H | 0 | 0 | general GO |
| immune_response (366)       | HIVEP1_01  | 0.52 |   | H | 0 | 0 | general GO |
| immune_response (366)       | AML1.01    | 0.52 |   | H | H | 0 | general GO |
| immune_response (366)       | ERR_01     | 0.52 |   | H | 0 | 0 | general GO |
| immune_response (366)       | ETS1.01    | 0.52 |   | H | 0 | 0 | general GO |
| immune_response (366)       | AML3.01    | 0.5  | M |   | 0 | 0 | general GO |
| immune_response (366)       | AP1.02     | 0.49 | H |   | 0 | 0 | general GO |
| immune_response (366)       | TR2.01     | 0.49 |   |   | 0 | 0 | general GO |
| immune_response (366)       | LXRE.01    | 0.48 |   | H | 0 | 0 | general GO |
| immune_response (366)       | ETS2.01    | 0.48 |   | H | 0 | 0 | general GO |
| immune_response (366)       | GRE.01     | 0.47 |   | H | 0 | 0 | general GO |
| immune_response (366)       | PAX2.01    | 0.47 | M | H | 0 | 0 | general GO |
| immune_response (366)       | AP1.03     | 0.47 |   | H | 0 | 0 | general GO |
| immune_response (366)       | PPARA.01   | 0.47 | M | H | 0 | 0 | general GO |
| immune_response (366)       | NFE2L2.01  | 0.47 |   | H | 0 | 0 | general GO |
| immune_response (366)       | MTATA.01   | 0.47 |   |   | 0 | 0 | general GO |
| immune_response (366)       | SRF.03     | 0.47 | H | H |   | 0 | general GO |
| immune_response (366)       | BACH1.01   | 0.47 | H |   | H | 0 | general GO |
| immune_response (366)       | PLZF.01    | 0.47 |   | 0 | 0 | 0 | general GO |
| immune_response (366)       | AREB6.04   | 0.47 |   | H | 0 | 0 | general GO |
| immune_response (366)       | GKLF_02    | 0.46 |   | 0 | 0 | 0 | general GO |
| immune_response (366)       | TAACC.01   | 0.46 |   | H | 0 | 0 | general GO |
| immune_response (366)       | MIT.01     | 0.46 |   |   | H | H | general GO |
| immune_response (366)       | RP58.01    | 0.46 |   | H | M | 0 | general GO |
| immune_response (366)       | PXRCAR.01  | 0.45 | H |   | 0 | 0 | general GO |
| immune_response (366)       | DBP.01     | 0.45 | M | 0 | H | 0 | general GO |
| immune_response (366)       | BARBIE.01  | 0.45 |   | H | 0 | 0 | general GO |
| immune_response (366)       | BRACH.01   | 0.45 | H | 0 | M | 0 | general GO |
| immune_response (366)       | PAX8.01    | 0.45 |   | M | 0 | 0 | general GO |
| immune_response (366)       | GATA1.01   | 0.45 |   | 0 | H | 0 | general GO |
| immune_response (366)       | RTR.01     | 0.45 |   | H | H | 0 | general GO |
| immune_response (366)       | STAT.01    | 0.44 |   | H |   | 0 | general GO |
| immune_response (366)       | PRE.01     | 0.44 |   |   | H | 0 | general GO |
| immune_response (366)       | TCF11.01   | 0.44 | 0 |   | 0 | 0 | general GO |
| immune_response (366)       | BCL6.02    | 0.44 | H |   | 0 | 0 | general GO |
| immune_response (366)       | TCF11MAFG  | 0.43 |   | H | H | 0 | general GO |
| immune_response (366)       | ILF1_01    | 0.43 |   | H | 0 | 0 | general GO |
| immune_response (366)       | AP1.01     | 0.43 |   | H | H | 0 | general GO |
| immune_response (366)       | ISL1.01    | 0.43 |   | H | H | 0 | general GO |
| immune_response (366)       | ISRE.01    | 0.43 |   |   | 0 | 0 | general GO |
| immune_response (366)       | IRF2.01    | 0.43 |   |   | 0 | 0 | general GO |
| immune_response (366)       | IRF3.01    | 0.42 |   |   | 0 | 0 | general GO |

|                       |           |      |   |   |   |   |            |            |            |
|-----------------------|-----------|------|---|---|---|---|------------|------------|------------|
| immune_response (366) | SRF.01    | 0.42 |   |   | H | 0 | general GO |            |            |
| immune_response (366) | NKX25.01  | 0.42 |   | 0 | H | 0 | general GO |            |            |
| immune_response (366) | GATA1.02  | 0.41 |   |   | H | 0 | general GO |            |            |
| immune_response (366) | PRDM1.01  | 0.41 |   | H | M | 0 | general GO |            |            |
| immune_response (366) | HMG1Y.01  | 0.41 |   |   | H | 0 | general GO |            |            |
| immune_response (366) | PDX1_Gabi | 0.41 | M |   | H | H | 0          | general GO |            |
| immune_response (366) | FAST1.01  | 0.41 |   |   | H | 0 | 0          | general GO |            |
| immune_response (366) | GATA.01   | 0.41 |   |   | H | H | 0          | general GO |            |
| immune_response (366) | HBP1_01   | 0.41 |   | 0 | 0 | 0 | 0          | general GO |            |
| immune_response (366) | RORA1.01  | 0.41 |   |   | H | H | 0          | general GO |            |
| immune_response (366) | PHOX2_01  | 0.41 | M |   |   | H | H          | 0          | general GO |
| immune_response (366) | PSE_02    | 0.41 |   |   | H | 0 | H          |            | general GO |
| immune_response (366) | BRN4.01   | 0.4  |   |   | H | 0 | 0          | 0          | general GO |
| immune_response (366) | LEF1.02   | 0.4  |   |   | H | 0 | 0          | 0          | general GO |
| immune_response (366) | MTBF.01   | 0.4  |   | M |   | H | 0          | 0          | general GO |
| immune_response (366) | IRF1.01   | 0.4  |   |   |   | 0 | 0          | 0          | general GO |
| immune_response (366) | CEBPB.01  | 0.4  |   |   | H | 0 | 0          | 0          | general GO |
| immune_response (366) | GATA1.04  | 0.4  |   |   | H | 0 | 0          | 0          | general GO |
| immune_response (366) | CRX.01    | 0.39 | M |   | H | 0 | 0          | 0          | general GO |
| immune_response (366) | OCT1.05   | 0.39 |   |   | H | H | 0          | 0          | general GO |
| immune_response (366) | AARE.01   | 0.39 |   |   |   | 0 | 0          | 0          | general GO |
| immune_response (366) | AIRE.01   | 0.39 |   |   | H | 0 | H          |            | general GO |
| immune_response (366) | LTATA_01  | 0.39 |   |   | H | 0 | 0          | 0          | general GO |
| immune_response (366) | BRN2.01   | 0.39 |   |   | H | H | 0          | 0          | general GO |
| immune_response (366) | IRF4.01   | 0.39 |   |   |   | 0 | 0          | 0          | general GO |
| immune_response (366) | STAT5.01  | 0.39 | H |   |   | 0 | 0          | 0          | general GO |
| immune_response (366) | GATA1.03  | 0.39 |   |   | H | 0 | 0          | 0          | general GO |
| immune_response (366) | BCL6.01   | 0.39 | H |   |   | 0 | 0          | 0          | general GO |
| immune_response (366) | OCT1.04   | 0.38 |   |   | H | 0 | 0          | 0          | general GO |
| immune_response (366) | GFI1B.01  | 0.38 | H |   |   | 0 | 0          | 0          | general GO |
| immune_response (366) | AMEF2.01  | 0.38 |   |   |   | 0 | 0          | 0          | general GO |
| immune_response (366) | RORA2.01  | 0.38 |   |   | H | H | 0          | 0          | general GO |
| immune_response (366) | NFAT.01   | 0.38 |   |   |   | 0 | 0          | 0          | general GO |
| immune_response (366) | FREAC4.01 | 0.38 | M |   | H | 0 | H          |            | general GO |
| immune_response (366) | CDX2.01   | 0.38 |   |   | H | 0 | 0          | 0          | general GO |
| immune_response (366) | MEF2.01   | 0.38 |   |   | H | 0 | 0          | 0          | general GO |
| immune_response (366) | MMEF2.01  | 0.37 |   | 0 | 0 | 0 | 0          | 0          | general GO |
| immune_response (366) | GATA2.02  | 0.36 |   |   | M |   | H          |            | general GO |
| immune_response (366) | GATA1.05  | 0.36 |   |   |   | 0 | H          |            | general GO |
| immune_response (366) | XFD3.01   | 0.36 |   |   | H | H | 0          | 0          | general GO |
| immune_response (366) | IRF7.01   | 0.36 |   |   |   | 0 | 0          | 0          | general GO |
| immune_response (366) | OCT1P.01  | 0.36 | M |   | H | H | 0          | 0          | general GO |
| immune_response (366) | OCT.01    | 0.35 |   |   | H | H | 0          | 0          | general GO |
| immune_response (366) | PDX1_G_SA | 0.35 |   |   | H | 0 | 0          | 0          | general GO |
| immune_response (366) | GATA2.01  | 0.35 |   |   |   | 0 | 0          | 0          | general GO |
| immune_response (366) | CDX1.01   | 0.35 |   |   | H | 0 | 0          | 0          | general GO |
| immune_response (366) | VBP.01    | 0.35 | M |   | H | 0 | 0          | 0          | general GO |
| immune_response (366) | NKX25.02  | 0.35 | M |   | H | 0 | 0          | 0          | general GO |
| immune_response (366) | OCT1.02   | 0.34 |   |   | H | H | 0          | 0          | general GO |
| immune_response (366) | DLX3.01   | 0.34 |   |   | H | 0 | 0          | 0          | general GO |
| immune_response (366) | HOXC13_01 | 0.34 |   |   | H | 0 | 0          | 0          | general GO |
| immune_response (366) | XFD1.01   | 0.34 |   |   | 0 | H | 0          | 0          | general GO |
| immune_response (366) | GSH2_01   | 0.34 | M |   | H | 0 | 0          | 0          | general GO |
| immune_response (366) | ATBF1.01  | 0.34 |   |   | H | H | 0          | 0          | general GO |
| immune_response (366) | HMEF2.01  | 0.34 |   |   | H | 0 | 0          | 0          | general GO |
| immune_response (366) | GATA3.01  | 0.34 |   |   |   | 0 | 0          | 0          | general GO |
| immune_response (366) | EV11.04   | 0.33 |   |   | H | H | 0          | 0          | general GO |
| immune_response (366) | EV11.02   | 0.33 |   |   | H | 0 | 0          | 0          | general GO |
| immune_response (366) | MEIS1_HOX | 0.33 |   |   | H | H | H          |            | general GO |
| immune_response (366) | PBX_HOX9  | 0.33 |   |   | H | H | H          |            | general GO |
| immune_response (366) | BRN2.03   | 0.32 | H |   |   | 0 | 0          | 0          | general GO |
| immune_response (366) | XFD2.01   | 0.32 |   |   | H | 0 | 0          | 0          | general GO |
| immune_response (366) | OC2.01    | 0.32 | H |   |   | 0 | 0          | 0          | general GO |
| immune_response (366) | LMX1B.01  | 0.32 |   |   | H | H | 0          | 0          | general GO |

|                                                   |            |      |   |   |   |   |            |
|---------------------------------------------------|------------|------|---|---|---|---|------------|
| immune_response (366)                             | FREAC3.01  | 0.32 |   | H | 0 | 0 | general GO |
| immune_response (366)                             | CART1.01   | 0.32 |   |   | 0 | 0 | general GO |
| immune_response (366)                             | HNF1.03    | 0.31 |   | H | H | 0 | general GO |
| immune_response (366)                             | EV11.01    | 0.31 |   | 0 | H | 0 | general GO |
| immune_response (366)                             | SOX5.01    | 0.31 |   | H | 0 | 0 | general GO |
| immune_response (366)                             | MSX.01     | 0.3  | M | H | H | 0 | general GO |
| immune_response (366)                             | BRN3.01    | 0.3  |   | H | 0 | 0 | general GO |
| immune_response (366)                             | ATATA.01   | 0.3  |   | 0 | 0 | 0 | general GO |
| immune_response (366)                             | EV11.06    | 0.3  |   | H | H | 0 | general GO |
| immune_response (366)                             | MEF2.02    | 0.3  |   | H | H | 0 | general GO |
| immune_response (366)                             | MEF2.03    | 0.3  |   | H | H | 0 | general GO |
| immune_response (366)                             | HNF1.01    | 0.3  |   | H | 0 | 0 | general GO |
| immune_response (366)                             | DLX1.01    | 0.29 |   | H | 0 | 0 | general GO |
| immune_response (366)                             | MEF2.05    | 0.29 |   | 0 | 0 | 0 | general GO |
| immune_response (366)                             | RSRFC4.02  | 0.29 |   | H | H | 0 | general GO |
| immune_response (366)                             | MEL1_01    | 0.29 |   |   | 0 | H | general GO |
| immune_response (366)                             | GATA3.02   | 0.29 | H |   | H | H | general GO |
| immune_response (366)                             | MEF2.04    | 0.29 |   | H | 0 | 0 | general GO |
| immune_response (366)                             | EV11.05    | 0.29 |   |   | 0 | 0 | general GO |
| immune_response (366)                             | TATA.01    | 0.28 |   | H | 0 | 0 | general GO |
| immune_response (366)                             | RSRFC4.01  | 0.28 |   |   | H | 0 | general GO |
| immune_response (366)                             | TATA.02    | 0.28 |   | H | 0 | 0 | general GO |
| immune_response (366)                             | PIT1.01    | 0.27 |   | H | H | 0 | general GO |
| immune_response (366)                             | FREAC7.01  | 0.27 |   | H | 0 | 0 | general GO |
| immune_response (366)                             | HFH1.01    | 0.27 |   | H | 0 | 0 | general GO |
| immune_response (366)                             | HFH8.01    | 0.27 |   | H | 0 | 0 | general GO |
| immune_response (366)                             | MYT1.01    | 0.27 |   | H | 0 | 0 | general GO |
| immune_response (366)                             | OCT1.01    | 0.26 |   | H |   | 0 | general GO |
| immune_response (366)                             | BRN5.01    | 0.26 |   | 0 | 0 | 0 | general GO |
| immune_response (366)                             | HNF3B.01   | 0.26 |   | H | M | 0 | general GO |
| immune_response (366)                             | HFH2.01    | 0.25 | M | H | 0 | 0 | general GO |
| immune_response (366)                             | NKX31.01   | 0.25 |   | H | 0 | 0 | general GO |
| immune_response (366)                             | EV11.03    | 0.24 |   | H | 0 | H | general GO |
| immune_response (366)                             | S8.01      | 0.24 | M | 0 | H | 0 | general GO |
| immune_response (366)                             | BRIGHT.01  | 0.22 |   | H | H | 0 | general GO |
| immune_response (366)                             | OCT1.06    | 0.22 |   | H | H | 0 | general GO |
| immune_response (366)                             | LHX3.01    | 0.14 |   | H | H | 0 | general GO |
| immune_response (366)                             | poly_A     | 0.01 |   | H | 0 | 0 | general GO |
| homophilic_cell_adhesion (70)                     | NFAT.01    | 0.38 |   | 0 | 0 | 0 | general GO |
| homophilic_cell_adhesion (70)                     | OCT1P.01   | 0.36 | 0 | M | H | 0 | general GO |
| G_protein_coupled_receptor_protein_signaling_path | TAL1BETAIT | 0.47 | H | M | 0 | 0 | general GO |
| G_protein_coupled_receptor_protein_signaling_path | MEL1_02    | 0.46 |   | 0 | 0 | 0 | general GO |
| G_protein_coupled_receptor_protein_signaling_path | BRACH.01   | 0.45 |   | H | 0 | 0 | general GO |
| G_protein_coupled_receptor_protein_signaling_path | TCF11MAFG  | 0.43 |   | 0 | 0 | 0 | general GO |
| G_protein_coupled_receptor_protein_signaling_path | ISL1.01    | 0.43 |   | 0 | 0 | 0 | general GO |
| G_protein_coupled_receptor_protein_signaling_path | GATA1.04   | 0.4  |   | H | 0 | 0 | general GO |
| G_protein_coupled_receptor_protein_signaling_path | IRF4.01    | 0.39 |   | 0 | 0 | 0 | general GO |
| G_protein_coupled_receptor_protein_signaling_path | RORA2.01   | 0.38 |   | H | 0 | 0 | general GO |
| G_protein_coupled_receptor_protein_signaling_path | FREAC4.01  | 0.38 |   | H | 0 | 0 | general GO |
| G_protein_coupled_receptor_protein_signaling_path | GATA2.02   | 0.36 | H |   | 0 | 0 | general GO |
| G_protein_coupled_receptor_protein_signaling_path | XFD3.01    | 0.36 |   | 0 | H | 0 | general GO |
| G_protein_coupled_receptor_protein_signaling_path | GATA2.01   | 0.35 |   | H | H | 0 | general GO |
| G_protein_coupled_receptor_protein_signaling_path | GATA3.01   | 0.34 |   | H | H | 0 | general GO |
| G_protein_coupled_receptor_protein_signaling_path | EV11.02    | 0.33 |   | 0 | 0 | 0 | general GO |
| G_protein_coupled_receptor_protein_signaling_path | XFD2.01    | 0.32 |   | 0 | 0 | H | general GO |
| G_protein_coupled_receptor_protein_signaling_path | OC2.01     | 0.32 |   | H | 0 | 0 | general GO |
| G_protein_coupled_receptor_protein_signaling_path | EV11.01    | 0.31 |   | H | H | 0 | general GO |
| G_protein_coupled_receptor_protein_signaling_path | MEL1_01    | 0.29 |   | H | H | 0 | general GO |
| G_protein_coupled_receptor_protein_signaling_path | GATA3.02   | 0.29 | H |   | H | 0 | general GO |
| G_protein_coupled_receptor_protein_signaling_path | EV11.05    | 0.29 |   | 0 | 0 | 0 | general GO |
| G_protein_coupled_receptor_protein_signaling_path | HFH1.01    | 0.27 |   | 0 | H | 0 | general GO |
| G_protein_coupled_receptor_protein_signaling_path | EV11.03    | 0.24 |   | H | 0 | 0 | general GO |
| G_protein_coupled_receptor_protein_signaling_path | poly_A     | 0.01 |   | 0 | 0 | 0 | general GO |
| G_protein_coupled_receptor_protein_signaling_path | AT rich    | 0.01 |   | H | 0 | 0 | general GO |

|                                             |            |      |   |   |   |   |            |
|---------------------------------------------|------------|------|---|---|---|---|------------|
| fatty_acid_metabolism (55)                  | COUP.01    | 0.48 | M | H | 0 | 0 | general GO |
| excretion (35)                              | NRL.01     | 0.51 | H | 0 | M | 0 | general GO |
| ER_to_Golgi_transport (47)                  | ATF6.02    | 0.6  |   | 0 | 0 | 0 | general GO |
| ER_to_Golgi_transport (47)                  | E4F.01     | 0.51 |   | 0 | 0 | 0 | general GO |
| ER_to_Golgi_transport (47)                  | CREBP1CJU  | 0.44 |   | 0 | 0 | 0 | general GO |
| epidermis_development (59)                  | AML3.01    | 0.5  | M | 0 | H | 0 | general GO |
| epidermis_development (59)                  | TATA.01    | 0.28 |   | 0 | 0 | 0 | general GO |
| epidermis_development (59)                  | TATA.02    | 0.28 |   | 0 | 0 | 0 | general GO |
| electron_transport (214)                    | LMO2COM.0  | 0.48 | 0 |   | 0 | 0 | general GO |
| electron_transport (214)                    | TAL1BETAIT | 0.47 | 0 | M | H | 0 | general GO |
| electron_transport (214)                    | PLZF.01    | 0.47 | 0 |   | 0 | 0 | general GO |
| electron_transport (214)                    | GATA1.03   | 0.39 | M | H | 0 | 0 | general GO |
| DNA_replication (91)                        | ELK1.02    | 0.55 | H | M | 0 | 0 | general GO |
| DNA_replication (91)                        | E2F.03     | 0.54 | H |   | 0 | 0 | general GO |
| DNA_repair (148)                            | E2F.02     | 0.59 |   | M | 0 | 0 | general GO |
| DNA_repair (148)                            | E2F.03     | 0.54 |   | M | 0 | 0 | general GO |
| DNA_repair (148)                            | FLI.01     | 0.53 |   | H | 0 | 0 | general GO |
| DNA_repair (148)                            | NFY.01     | 0.52 |   | 0 | 0 | 0 | general GO |
| DNA_repair (148)                            | E2F.01     | 0.5  | H | M | 0 | 0 | general GO |
| DNA_metabolism (47)                         | E2F.02     | 0.59 |   | 0 | 0 | 0 | general GO |
| DNA_metabolism (47)                         | E2F.03     | 0.54 |   | 0 | 0 | 0 | general GO |
| DNA_metabolism (47)                         | E2F.01     | 0.5  |   | 0 | 0 | 0 | general GO |
| digestion (51)                              | FREAC3.01  | 0.32 |   | 0 | 0 | 0 | general GO |
| digestion (51)                              | MEL1_01    | 0.29 | M | H | 0 | 0 | general GO |
| digestion (51)                              | TATA.01    | 0.28 |   | 0 | 0 | 0 | general GO |
| digestion (51)                              | FREAC7.01  | 0.27 |   | 0 | 0 | 0 | general GO |
| digestion (51)                              | HFH1.01    | 0.27 |   | 0 | 0 | 0 | general GO |
| digestion (51)                              | HFH8.01    | 0.27 |   | 0 | 0 | 0 | general GO |
| digestion (51)                              | HNF3B.01   | 0.26 |   | 0 | 0 | 0 | general GO |
| digestion (51)                              | EV11.03    | 0.24 | M | H | 0 | 0 | general GO |
| defense_response (100)                      | NFKAPPAB.0 | 0.55 | M | H | 0 | 0 | general GO |
| defense_response (100)                      | PAX8.01    | 0.45 | 0 | 0 |   | 0 | general GO |
| defense_response (100)                      | TCF11.01   | 0.44 | H | M | 0 | H | general GO |
| defense_response (100)                      | MTBF.01    | 0.4  | M | H | 0 | 0 | general GO |
| defense_response (100)                      | NKX31.01   | 0.25 | M | H | H | 0 | general GO |
| circulation (52)                            | SRF.01     | 0.42 | 0 | 0 | H | M | general GO |
| chromosome_organization_and_biogenesis (83) | TATA.01    | 0.28 |   | H | 0 | 0 | general GO |
| chromatin_modification (53)                 | GC_rich    | 0.99 | 0 | 0 |   | 0 | general GO |
| chloride_transport (38)                     | ER.01      | 0.51 | 0 | 0 |   | 0 | general GO |
| chemotaxis (98)                             | NFKAPPAB.0 | 0.6  | H | M | 0 | 0 | general GO |
| chemotaxis (98)                             | NFKAPPAB.0 | 0.57 | H | M | 0 | 0 | general GO |
| chemotaxis (98)                             | NFKAPPAB6  | 0.55 | H | M | 0 | 0 | general GO |
| chemotaxis (98)                             | NFKAPPAB.0 | 0.55 | H |   | 0 | 0 | general GO |
| chemotaxis (98)                             | HIVEP1_01  | 0.52 | H | M | 0 | 0 | general GO |
| chemotaxis (98)                             | AP1.03     | 0.47 | H | M | 0 | 0 | general GO |
| chemotaxis (98)                             | NFE2L2.01  | 0.47 |   | 0 | 0 | 0 | general GO |
| chemotaxis (98)                             | GKLF_02    | 0.46 |   | 0 | 0 | 0 | general GO |
| chemotaxis (98)                             | BARBIE.01  | 0.45 |   | 0 | 0 | 0 | general GO |
| chemotaxis (98)                             | GATA1.01   | 0.45 |   | 0 | 0 | 0 | general GO |
| chemotaxis (98)                             | TCF11MAFG  | 0.43 |   | 0 | 0 | 0 | general GO |
| chemotaxis (98)                             | AP1.01     | 0.43 |   | H | 0 | 0 | general GO |
| chemotaxis (98)                             | ISL1.01    | 0.43 | M | 0 | H | 0 | general GO |
| chemotaxis (98)                             | SRF.01     | 0.42 |   | H | 0 | 0 | general GO |
| chemotaxis (98)                             | GATA.01    | 0.41 |   | 0 | 0 | 0 | general GO |
| chemotaxis (98)                             | PSE_02     | 0.41 | H | M | 0 | 0 | general GO |
| chemotaxis (98)                             | GATA1.04   | 0.4  |   | 0 | 0 | 0 | general GO |
| chemotaxis (98)                             | AARE.01    | 0.39 | M | H | 0 | 0 | general GO |
| chemotaxis (98)                             | LTATA_01   | 0.39 |   | 0 | 0 | 0 | general GO |
| chemotaxis (98)                             | BRN2.01    | 0.39 |   | 0 | 0 | 0 | general GO |
| chemotaxis (98)                             | GATA1.03   | 0.39 |   | 0 | H | 0 | general GO |
| chemotaxis (98)                             | BCL6.01    | 0.39 | H | 0 | M | 0 | general GO |
| chemotaxis (98)                             | NFAT.01    | 0.38 |   | 0 | 0 | 0 | general GO |
| chemotaxis (98)                             | CDX2.01    | 0.38 |   | 0 | H | 0 | general GO |
| chemotaxis (98)                             | GATA1.05   | 0.36 |   | 0 | 0 | H | general GO |

|                                                  |            |      |   |   |   |   |            |
|--------------------------------------------------|------------|------|---|---|---|---|------------|
| chemotaxis (98)                                  | PDX1_G_SA  | 0.35 | M | 0 | H | 0 | general GO |
| chemotaxis (98)                                  | GATA2.01   | 0.35 |   | 0 | H | 0 | general GO |
| chemotaxis (98)                                  | CDX1.01    | 0.35 |   | 0 | 0 | 0 | general GO |
| chemotaxis (98)                                  | GATA3.01   | 0.34 |   | 0 | H | 0 | general GO |
| chemotaxis (98)                                  | MEF2.05    | 0.29 |   | 0 |   | 0 | general GO |
| chemotaxis (98)                                  | TATA.01    | 0.28 |   | 0 | 0 | 0 | general GO |
| chemotaxis (98)                                  | TATA.02    | 0.28 |   | 0 | H | 0 | general GO |
| central_nervous_system_development (68)          | poly_C     | 0.99 | 0 |   | 0 | 0 | general GO |
| central_nervous_system_development (68)          | MUSCLE_IN  | 0.62 | 0 |   | 0 | 0 | general GO |
| cellular_defense_response (68)                   | AML3.01    | 0.5  | H | 0 | M | 0 | general GO |
| cellular_defense_response (68)                   | ETS2.01    | 0.48 | H | M | 0 | 0 | general GO |
| cellular_defense_response (68)                   | AP1.01     | 0.43 |   | H | 0 | 0 | general GO |
| cell_surface_receptor_linked_signal_transduction | ETS2.01    | 0.48 | M | H | 0 | 0 | general GO |
| cell_surface_receptor_linked_signal_transduction | TAL1BETAIT | 0.47 | 0 |   | 0 | 0 | general GO |
| cell_proliferation (243)                         | TATA.01    | 0.28 |   | 0 | 0 | 0 | general GO |
| cell_motility (106)                              | MEL1_01    | 0.29 | 0 | 0 | M | H | general GO |
| cell_division (103)                              | GABP.01    | 0.62 | 0 | 0 | 0 | 0 | general GO |
| cell_division (103)                              | NFY.01     | 0.52 | H |   | 0 | 0 | general GO |
| cell_division (103)                              | CAAT.01    | 0.49 | H |   | 0 | 0 | general GO |
| cell_division (103)                              | NFY.02     | 0.48 | H |   | 0 | 0 | general GO |
| cell_division (103)                              | NFY.03     | 0.47 | 0 |   | 0 | 0 | general GO |
| cell_division (103)                              | CHR.01     | 0.41 |   | 0 | 0 | 0 | general GO |
| cell_differentiation (192)                       | GC_rich    | 0.99 | 0 | H | 0 | M | general GO |
| cell_differentiation (192)                       | ZNF202.01  | 0.73 | 0 |   | 0 | 0 | general GO |
| cell_differentiation (192)                       | HAND2_E12  | 0.7  | 0 |   | 0 | 0 | general GO |
| cell_cycle (273)                                 | SP1.01     | 0.78 | H |   | 0 | 0 | general GO |
| cell_cycle (273)                                 | ZF9.01     | 0.72 |   | 0 | 0 | 0 | general GO |
| cell_cycle (273)                                 | EGR1.02    | 0.68 | H | M | 0 | 0 | general GO |
| cell_cycle (273)                                 | CDE.01     | 0.6  |   |   | 0 | 0 | general GO |
| cell_cycle (273)                                 | WHN.01     | 0.59 | H |   | 0 | 0 | general GO |
| cell_cycle (273)                                 | NFY.01     | 0.52 | H |   | 0 | 0 | general GO |
| cell_cycle (273)                                 | CAAT.01    | 0.49 |   |   | 0 | 0 | general GO |
| cell_cycle (273)                                 | NFY.02     | 0.48 |   |   | 0 | 0 | general GO |
| cell_cycle (273)                                 | NFY.03     | 0.47 | H |   | 0 | 0 | general GO |
| cell_cycle (273)                                 | CHR.01     | 0.41 |   | 0 | 0 | 0 | general GO |
| cell_cell_signaling (268)                        | NFKAPPAB.0 | 0.57 | H | M | 0 | 0 | general GO |
| cell_cell_signaling (268)                        | NFKAPPAB6  | 0.55 | H | M | 0 | 0 | general GO |
| cell_cell_signaling (268)                        | HIVEP1_01  | 0.52 | H | M | 0 | 0 | general GO |
| cell_cell_signaling (268)                        | MTATA.01   | 0.47 |   |   | 0 | 0 | general GO |
| cell_cell_signaling (268)                        | IRF2.01    | 0.43 | 0 |   | 0 | 0 | general GO |
| cell_cell_signaling (268)                        | SRF.01     | 0.42 |   | 0 | 0 | 0 | general GO |
| cell_cell_signaling (268)                        | PDX1_Gabi  | 0.41 |   | 0 | 0 | 0 | general GO |
| cell_cell_signaling (268)                        | LTATA_01   | 0.39 |   | 0 | 0 | 0 | general GO |
| cell_cell_signaling (268)                        | MEF2.05    | 0.29 |   | 0 | 0 | 0 | general GO |
| cell_cell_signaling (268)                        | TATA.01    | 0.28 |   | 0 | 0 | 0 | general GO |
| cell_cell_signaling (268)                        | TATA.02    | 0.28 |   | 0 | 0 | 0 | general GO |
| cation_transport (99)                            | AP2.01     | 0.73 | 0 | H | H |   | general GO |
| cation_transport (99)                            | NRSF.01    | 0.62 | M | H | 0 | 0 | general GO |
| cation_transport (99)                            | NRSE.01    | 0.57 | M | 0 | 0 | H | general GO |
| calcium_ion_homeostasis (30)                     | SRF.03     | 0.47 |   | 0 | 0 | 0 | general GO |
| calcium_ion_homeostasis (30)                     | BCL6.02    | 0.44 | H |   | 0 | H | general GO |
| calcium_ion_homeostasis (30)                     | TATA.01    | 0.28 |   | 0 | 0 | 0 | general GO |
| blood_coagulation (70)                           | ETS1.01    | 0.52 |   | 0 | 0 | 0 | general GO |
| blood_coagulation (70)                           | HNF1.02    | 0.34 |   | 0 | 0 | 0 | general GO |
| blood_coagulation (70)                           | HNF1.03    | 0.31 |   | 0 | 0 | 0 | general GO |
| blood_coagulation (70)                           | HNF1.01    | 0.3  |   | 0 | 0 | 0 | general GO |
| blood_coagulation (70)                           | SATB1.01   | 0.27 |   | 0 | 0 | 0 | general GO |
| blood_coagulation (70)                           | HNF3B.01   | 0.26 |   | H | 0 | 0 | general GO |
| biosynthesis (32)                                | NFY.01     | 0.52 |   | 0 | 0 | 0 | general GO |
| biosynthesis (32)                                | CAAT.01    | 0.49 |   | H | 0 | 0 | general GO |
| apoptosis (258)                                  | CREL.01    | 0.55 | M |   | 0 | 0 | general GO |
| antimicrobial_humoral_response (87)              | AREB6.01   | 0.49 | H | M | 0 | 0 | general GO |
| antimicrobial_humoral_response (87)              | MIT.01     | 0.46 |   | H | 0 | 0 | general GO |
| antimicrobial_humoral_response (87)              | AP1.01     | 0.43 | H | M | 0 | 0 | general GO |

|                                     |           |      |   |   |   |            |
|-------------------------------------|-----------|------|---|---|---|------------|
| antimicrobial_humoral_response (87) | ISL1.01   | 0.43 | H | H | 0 | general GO |
| antimicrobial_humoral_response (87) | GATA.01   | 0.41 | M | H | 0 | general GO |
| antimicrobial_humoral_response (87) | MTBF.01   | 0.4  |   | 0 | 0 | general GO |
| antimicrobial_humoral_response (87) | OCT1.05   | 0.39 | H | 0 | 0 | general GO |
| antimicrobial_humoral_response (87) | LTATA_01  | 0.39 | H | 0 | 0 | general GO |
| antimicrobial_humoral_response (87) | GATA1.03  | 0.39 | H | 0 | 0 | general GO |
| antimicrobial_humoral_response (87) | CDX2.01   | 0.38 |   | 0 | 0 | general GO |
| antimicrobial_humoral_response (87) | GATA1.05  | 0.36 | H | 0 | 0 | general GO |
| antimicrobial_humoral_response (87) | OCT.01    | 0.35 | H | 0 | H | general GO |
| antimicrobial_humoral_response (87) | CDX1.01   | 0.35 | H | 0 | H | general GO |
| antimicrobial_humoral_response (87) | EVH1.04   | 0.33 | H | M | 0 | general GO |
| antimicrobial_humoral_response (87) | EN1.01    | 0.32 | H |   | 0 | general GO |
| antimicrobial_humoral_response (87) | HNF6.01   | 0.31 | M | H | 0 | general GO |
| antimicrobial_humoral_response (87) | XVENT2.01 | 0.3  |   | H | 0 | general GO |
| amino_acid_metabolism (45)          | ERR_01    | 0.52 | H | M | 0 | general GO |





# 400bp Window

| GO group                          | Motifs       | motif GC | -199 - 200 | 201 - 600 | 601 - 1000 | GO-classes       |
|-----------------------------------|--------------|----------|------------|-----------|------------|------------------|
| development (530)                 | GC_rich      | 1        | H          |           |            | transcription GO |
| development (530)                 | poly_C       | 1        |            |           |            | transcription GO |
| development (530)                 | SP1.01       | 0.8      | 0          |           |            | transcription GO |
| development (530)                 | WT1.01       | 0.8      | H          |           |            | transcription GO |
| development (530)                 | HES1.02      | 0.8      | 0          | M         |            | transcription GO |
| development (530)                 | MAZR.01      | 0.8      |            |           |            | transcription GO |
| development (530)                 | ZNF202.01    | 0.7      |            |           |            | transcription GO |
| development (530)                 | AP2.01       | 0.7      | H          |           |            | transcription GO |
| development (530)                 | ZF9.01       | 0.7      | 0          |           |            | transcription GO |
| development (530)                 | EGR3.01      | 0.7      | 0          | 0         |            | transcription GO |
| development (530)                 | MYCMAX.03    | 0.7      | H          |           | 0          | transcription GO |
| development (530)                 | NFKAPPAB5    | 0.7      | 0          | H         |            | transcription GO |
| development (530)                 | HAND2_E12.   | 0.7      | 0          | H         |            | transcription GO |
| development (530)                 | ZBP89.01     | 0.7      |            |           |            | transcription GO |
| development (530)                 | NGFIC.01     | 0.7      | 0          | H         | M          | transcription GO |
| development (530)                 | CKROX_01     | 0.7      |            |           |            | transcription GO |
| development (530)                 | EGR1.02      | 0.7      | H          |           |            | transcription GO |
| development (530)                 | HIC1_01      | 0.7      | 0          | H         |            | transcription GO |
| development (530)                 | EGR2.01      | 0.7      | 0          | 0         |            | transcription GO |
| development (530)                 | GC.01        | 0.7      | 0          |           | 0          | transcription GO |
| development (530)                 | MZF1.01      | 0.7      | H          | H         |            | transcription GO |
| development (530)                 | MAZ.01       | 0.7      | H          |           |            | transcription GO |
| development (530)                 | ZIC2_01      | 0.6      | 0          | H         |            | transcription GO |
| development (530)                 | PLAG1_01     | 0.6      |            |           |            | transcription GO |
| development (530)                 | INSM1_01     | 0.6      | 0          | H         |            | transcription GO |
| development (530)                 | MUSCLE_INI   | 0.6      | 0          | H         |            | transcription GO |
| development (530)                 | MUSCLE_INI   | 0.6      | 0          | H         |            | transcription GO |
| development (530)                 | CDE.01       | 0.6      | 0          | H         |            | transcription GO |
| development (530)                 | AHR.01       | 0.6      | 0          | 0         |            | transcription GO |
| development (530)                 | E2F.02       | 0.6      | 0          | 0         |            | transcription GO |
| development (530)                 | NRSE.01      | 0.6      | 0          | H         |            | transcription GO |
| development (530)                 | PAX5.01      | 0.6      | 0          | H         |            | transcription GO |
| development (530)                 | GAGA.01      | 0.6      |            |           |            | transcription GO |
| development (530)                 | AG_rich_codi | 0.5      |            | H         | H          | transcription GO |
| regulation_of_transcription (266) | GC_rich      | 1        |            |           |            | transcription GO |
| regulation_of_transcription (266) | poly_C       | 1        |            |           |            | transcription GO |
| regulation_of_transcription (266) | SP1.01       | 0.8      | H          | M         |            | transcription GO |
| regulation_of_transcription (266) | WT1.01       | 0.8      | H          | H         |            | transcription GO |
| regulation_of_transcription (266) | MAZR.01      | 0.8      |            |           |            | transcription GO |
| regulation_of_transcription (266) | ZNF202.01    | 0.7      |            |           |            | transcription GO |
| regulation_of_transcription (266) | AP2.01       | 0.7      | H          | H         |            | transcription GO |
| regulation_of_transcription (266) | ZF5.01       | 0.7      | H          | H         |            | transcription GO |
| regulation_of_transcription (266) | ZF9.01       | 0.7      | 0          |           |            | transcription GO |
| regulation_of_transcription (266) | EGR3.01      | 0.7      | H          | 0         |            | transcription GO |
| regulation_of_transcription (266) | ZBP89.01     | 0.7      |            |           | H          | transcription GO |
| regulation_of_transcription (266) | NGFIC.01     | 0.7      | H          | 0         | M          | transcription GO |
| regulation_of_transcription (266) | CKROX_01     | 0.7      |            |           | H          | transcription GO |
| regulation_of_transcription (266) | EGR1.02      | 0.7      |            |           |            | transcription GO |
| regulation_of_transcription (266) | EGR2.01      | 0.7      | H          | 0         |            | transcription GO |
| regulation_of_transcription (266) | GC.01        | 0.7      | 0          |           | 0          | transcription GO |
| regulation_of_transcription (266) | MZF1.01      | 0.7      |            | H         |            | transcription GO |

|                                                  |             |     |   |   |   |                  |
|--------------------------------------------------|-------------|-----|---|---|---|------------------|
| regulation_of_transcription (266)                | EGR1.01     | 0.7 | H | 0 | M | transcription GO |
| regulation_of_transcription (266)                | MAZ.01      | 0.7 |   |   |   | transcription GO |
| regulation_of_transcription (266)                | ZIC2_01     | 0.6 | 0 | M | H | transcription GO |
| regulation_of_transcription (266)                | PLAG1_01    | 0.6 |   |   | H | transcription GO |
| regulation_of_transcription (266)                | RREB1.01    | 0.6 | 0 | H |   | transcription GO |
| regulation_of_transcription (266)                | CDE.01      | 0.6 | H |   |   | transcription GO |
| regulation_of_transcription (266)                | E2F.02      | 0.6 | 0 | H |   | transcription GO |
| regulation_of_transcription (266)                | PAX5.01     | 0.6 | 0 |   | H | transcription GO |
| regulation_of_transcription (266)                | GAGA.01     | 0.6 |   |   | 0 | transcription GO |
| regulation_of_transcription (266)                | NFY.01      | 0.5 | H |   | 0 | transcription GO |
| regulation_of_transcription (266)                | AG_rich_cod | 0.5 |   |   | H | transcription GO |
| regulation_of_transcription (266)                | GKLF.01     | 0.5 |   | H | 0 | transcription GO |
| regulation_of_transcription (266)                | CAAT.01     | 0.5 |   |   | 0 | transcription GO |
| regulation_of_transcription (266)                | PBX1_MEIS1  | 0.5 | H | M | 0 | transcription GO |
| regulation_of_transcription (266)                | PBX1_MEIS1  | 0.4 | H | M | 0 | transcription GO |
| regulation_of_transcription_DNA_dependent (1066) | GC_rich     | 1   |   |   |   | transcription GO |
| regulation_of_transcription_DNA_dependent (1066) | poly_C      | 1   |   |   |   | transcription GO |
| regulation_of_transcription_DNA_dependent (1066) | SP1.01      | 0.8 | H |   |   | transcription GO |
| regulation_of_transcription_DNA_dependent (1066) | WT1.01      | 0.8 |   |   |   | transcription GO |
| regulation_of_transcription_DNA_dependent (1066) | HES1.02     | 0.8 | H |   | H | transcription GO |
| regulation_of_transcription_DNA_dependent (1066) | MAZR.01     | 0.8 |   |   |   | transcription GO |
| regulation_of_transcription_DNA_dependent (1066) | ZNF202.01   | 0.7 |   |   |   | transcription GO |
| regulation_of_transcription_DNA_dependent (1066) | AP2.01      | 0.7 |   |   |   | transcription GO |
| regulation_of_transcription_DNA_dependent (1066) | ZF5.01      | 0.7 |   |   |   | transcription GO |
| regulation_of_transcription_DNA_dependent (1066) | ZF9.01      | 0.7 | H |   |   | transcription GO |
| regulation_of_transcription_DNA_dependent (1066) | EGR3.01     | 0.7 | H |   |   | transcription GO |
| regulation_of_transcription_DNA_dependent (1066) | NRF1_01     | 0.7 | H |   |   | transcription GO |
| regulation_of_transcription_DNA_dependent (1066) | MYCMAX.03   | 0.7 | H |   | H | transcription GO |
| regulation_of_transcription_DNA_dependent (1066) | NFKAPPAB5   | 0.7 | 0 | M |   | transcription GO |
| regulation_of_transcription_DNA_dependent (1066) | ZBP89.01    | 0.7 |   |   |   | transcription GO |
| regulation_of_transcription_DNA_dependent (1066) | HELT.01     | 0.7 | H | H |   | transcription GO |
| regulation_of_transcription_DNA_dependent (1066) | NGFIC.01    | 0.7 | H |   |   | transcription GO |
| regulation_of_transcription_DNA_dependent (1066) | CKROX_01    | 0.7 |   |   |   | transcription GO |
| regulation_of_transcription_DNA_dependent (1066) | EGR1.02     | 0.7 |   |   |   | transcription GO |
| regulation_of_transcription_DNA_dependent (1066) | HIC1_01     | 0.7 | 0 | M |   | transcription GO |
| regulation_of_transcription_DNA_dependent (1066) | BKLF.01     | 0.7 | 0 |   |   | transcription GO |
| regulation_of_transcription_DNA_dependent (1066) | EGR2.01     | 0.7 | H |   |   | transcription GO |
| regulation_of_transcription_DNA_dependent (1066) | GC.01       | 0.7 | 0 |   |   | transcription GO |
| regulation_of_transcription_DNA_dependent (1066) | MZF1.01     | 0.7 |   |   | H | transcription GO |
| regulation_of_transcription_DNA_dependent (1066) | EGR1.01     | 0.7 | H |   |   | transcription GO |
| regulation_of_transcription_DNA_dependent (1066) | MTF-1.01    | 0.7 | 0 |   | H | transcription GO |
| regulation_of_transcription_DNA_dependent (1066) | MAZ.01      | 0.7 |   |   |   | transcription GO |
| regulation_of_transcription_DNA_dependent (1066) | ZIC2_01     | 0.6 | H |   | H | transcription GO |
| regulation_of_transcription_DNA_dependent (1066) | ATF6.01     | 0.6 | M |   | H | transcription GO |
| regulation_of_transcription_DNA_dependent (1066) | PLAG1_01    | 0.6 |   |   |   | transcription GO |
| regulation_of_transcription_DNA_dependent (1066) | EBVR.01     | 0.6 | H |   |   | transcription GO |
| regulation_of_transcription_DNA_dependent (1066) | AHRARNT.02  | 0.6 | H | H |   | transcription GO |
| regulation_of_transcription_DNA_dependent (1066) | HES1.01     | 0.6 |   |   |   | transcription GO |
| regulation_of_transcription_DNA_dependent (1066) | MUSCLE_INI  | 0.6 | H |   |   | transcription GO |
| regulation_of_transcription_DNA_dependent (1066) | GABP.01     | 0.6 | 0 |   | H | transcription GO |
| regulation_of_transcription_DNA_dependent (1066) | HIF1.01     | 0.6 | 0 |   | H | transcription GO |
| regulation_of_transcription_DNA_dependent (1066) | MUSCLE_INI  | 0.6 | H |   | H | transcription GO |
| regulation_of_transcription_DNA_dependent (1066) | EKLF.01     | 0.6 | 0 |   |   | transcription GO |
| regulation_of_transcription_DNA_dependent (1066) | RREB1.01    | 0.6 | 0 | H |   | transcription GO |
| regulation_of_transcription_DNA_dependent (1066) | CDE.01      | 0.6 |   |   |   | transcription GO |
| regulation_of_transcription_DNA_dependent (1066) | AHR.01      | 0.6 | 0 | H |   | transcription GO |
| regulation_of_transcription_DNA_dependent (1066) | E2F.02      | 0.6 | H | H |   | transcription GO |
| regulation_of_transcription_DNA_dependent (1066) | WHN.01      | 0.6 | H | H |   | transcription GO |
| regulation_of_transcription_DNA_dependent (1066) | TAXCREB.01  | 0.6 | 0 |   | 0 | transcription GO |
| regulation_of_transcription_DNA_dependent (1066) | PAX9.01     | 0.6 | 0 | M |   | transcription GO |
| regulation_of_transcription_DNA_dependent (1066) | NRSE.01     | 0.6 | 0 | M | H | transcription GO |
| regulation_of_transcription_DNA_dependent (1066) | VDR_RXR.02  | 0.6 | H | M | 0 | transcription GO |
| regulation_of_transcription_DNA_dependent (1066) | GAGA.01     | 0.6 |   |   |   | transcription GO |
| regulation_of_transcription_DNA_dependent (1066) | E2F.03      | 0.5 | H | H |   | transcription GO |

|                                                                   |              |     |   |   |   |                  |
|-------------------------------------------------------------------|--------------|-----|---|---|---|------------------|
| regulation_of_transcription_DNA_dependent (1066)                  | NFY.01       | 0.5 | H |   | 0 | transcription GO |
| regulation_of_transcription_DNA_dependent (1066)                  | AG_rich_codi | 0.5 |   |   | 0 | transcription GO |
| regulation_of_transcription_DNA_dependent (1066)                  | E2F.01       | 0.5 | H | 0 | M | transcription GO |
| regulation_of_transcription_DNA_dependent (1066)                  | GKLF.01      | 0.5 |   | M | 0 | transcription GO |
| regulation_of_transcription_DNA_dependent (1066)                  | CAAT.01      | 0.5 |   | H | 0 | transcription GO |
| regulation_of_transcription_from_RNA_polymerase_II_promoter (163) | SP1.01       | 0.8 | H |   | 0 | transcription GO |
| regulation_of_transcription_from_RNA_polymerase_II_promoter (163) | WT1.01       | 0.8 |   | H | H | transcription GO |
| regulation_of_transcription_from_RNA_polymerase_II_promoter (163) | MAZR.01      | 0.8 |   | H | 0 | transcription GO |
| regulation_of_transcription_from_RNA_polymerase_II_promoter (163) | ZF5.01       | 0.7 | H | 0 | M | transcription GO |
| regulation_of_transcription_from_RNA_polymerase_II_promoter (163) | CKROX_01     | 0.7 |   | H | 0 | transcription GO |
| regulation_of_transcription_from_RNA_polymerase_II_promoter (163) | MAZ.01       | 0.7 |   |   | 0 | transcription GO |
| regulation_of_transcription_from_RNA_polymerase_II_promoter (163) | EBVR.01      | 0.6 | H | 0 | M | transcription GO |
| regulation_of_transcription_from_RNA_polymerase_II_promoter (163) | HES1.01      | 0.6 | H | 0 | M | transcription GO |
| regulation_of_transcription_from_RNA_polymerase_II_promoter (163) | CDE.01       | 0.6 | H |   | 0 | transcription GO |
| transcription (930)                                               | GC_rich      | 1   |   |   |   | transcription GO |
| transcription (930)                                               | poly_C       | 1   |   |   |   | transcription GO |
| transcription (930)                                               | SP1.01       | 0.8 | H |   |   | transcription GO |
| transcription (930)                                               | WT1.01       | 0.8 |   |   |   | transcription GO |
| transcription (930)                                               | HES1.02      | 0.8 | H |   | H | transcription GO |
| transcription (930)                                               | MAZR.01      | 0.8 |   |   |   | transcription GO |
| transcription (930)                                               | ZNF202.01    | 0.7 |   |   |   | transcription GO |
| transcription (930)                                               | AP2.01       | 0.7 |   |   |   | transcription GO |
| transcription (930)                                               | ZF5.01       | 0.7 |   |   |   | transcription GO |
| transcription (930)                                               | ZF9.01       | 0.7 | H |   |   | transcription GO |
| transcription (930)                                               | EGR3.01      | 0.7 | H |   |   | transcription GO |
| transcription (930)                                               | NRF1_01      | 0.7 | H |   |   | transcription GO |
| transcription (930)                                               | MYCMAX.03    | 0.7 | H |   | H | transcription GO |
| transcription (930)                                               | ZBP89.01     | 0.7 |   |   |   | transcription GO |
| transcription (930)                                               | HELT.01      | 0.7 | H |   |   | transcription GO |
| transcription (930)                                               | NGFIC.01     | 0.7 | H |   | H | transcription GO |
| transcription (930)                                               | CKROX_01     | 0.7 |   |   |   | transcription GO |
| transcription (930)                                               | EGR1.02      | 0.7 |   |   |   | transcription GO |
| transcription (930)                                               | HIC1_01      | 0.7 | 0 | 0 |   | transcription GO |
| transcription (930)                                               | GC.01        | 0.7 | H |   |   | transcription GO |
| transcription (930)                                               | MZF1.01      | 0.7 |   | 0 | H | transcription GO |
| transcription (930)                                               | EGR1.01      | 0.7 | H |   | H | transcription GO |
| transcription (930)                                               | MTF-1.01     | 0.7 | 0 | M | H | transcription GO |
| transcription (930)                                               | MAZ.01       | 0.7 |   |   |   | transcription GO |
| transcription (930)                                               | ZIC2_01      | 0.6 | H |   | 0 | transcription GO |
| transcription (930)                                               | PLAG1_01     | 0.6 |   |   |   | transcription GO |
| transcription (930)                                               | EBVR.01      | 0.6 | H | H |   | transcription GO |
| transcription (930)                                               | AHRARNT.02   | 0.6 |   | H |   | transcription GO |
| transcription (930)                                               | HES1.01      | 0.6 |   |   | H | transcription GO |
| transcription (930)                                               | MUSCLE_INI   | 0.6 | H |   | H | transcription GO |
| transcription (930)                                               | HIF1.01      | 0.6 | H |   | H | transcription GO |
| transcription (930)                                               | MUSCLE_INI   | 0.6 | H |   | H | transcription GO |
| transcription (930)                                               | EKLF.01      | 0.6 | 0 | 0 |   | transcription GO |
| transcription (930)                                               | CDE.01       | 0.6 |   |   |   | transcription GO |
| transcription (930)                                               | AHR.01       | 0.6 | H | H | M | transcription GO |
| transcription (930)                                               | E2F.02       | 0.6 | H | H |   | transcription GO |
| transcription (930)                                               | WHN.01       | 0.6 | H | H |   | transcription GO |
| transcription (930)                                               | TAXCREB.01   | 0.6 | 0 |   | 0 | transcription GO |
| transcription (930)                                               | PAX9.01      | 0.6 | 0 | H |   | transcription GO |
| transcription (930)                                               | NRSE.01      | 0.6 | 0 | M | H | transcription GO |
| transcription (930)                                               | PAX5.03      | 0.6 | H | M | 0 | transcription GO |
| transcription (930)                                               | GAGA.01      | 0.6 |   |   | 0 | transcription GO |
| transcription (930)                                               | E2F.03       | 0.5 | H | H |   | transcription GO |
| transcription (930)                                               | AG_rich_codi | 0.5 |   |   | 0 | transcription GO |
| transcription (930)                                               | E2F.01       | 0.5 | H | 0 | M | transcription GO |
| transcription_RNA_polyII_promoter (190)                           | GC_rich      | 1   | H |   | 0 | general GO       |
| transcription_RNA_polyII_promoter (190)                           | SP1.01       | 0.8 | 0 |   | 0 | general GO       |
| transcription_RNA_polyII_promoter (190)                           | WT1.01       | 0.8 | H |   | 0 | general GO       |
| transcription_RNA_polyII_promoter (190)                           | MAZR.01      | 0.8 |   | H | 0 | general GO       |
| transcription_RNA_polyII_promoter (190)                           | ZNF202.01    | 0.7 | H |   | 0 | general GO       |

|                                                     |            |     |   |   |   |            |
|-----------------------------------------------------|------------|-----|---|---|---|------------|
| transcription_RNA_polyll_promoter (190)             | AP2.01     | 0.7 | H | M | H | general GO |
| transcription_RNA_polyll_promoter (190)             | ZF9.01     | 0.7 | 0 |   |   | general GO |
| transcription_RNA_polyll_promoter (190)             | NRF1_01    | 0.7 | 0 |   | 0 | general GO |
| transcription_RNA_polyll_promoter (190)             | MYCMAX.03  | 0.7 | H | M | 0 | general GO |
| transcription_RNA_polyll_promoter (190)             | EGR1.02    | 0.7 | H |   | 0 | general GO |
| transcription_RNA_polyll_promoter (190)             | HIC1_01    | 0.7 | 0 | 0 |   | general GO |
| transcription_RNA_polyll_promoter (190)             | MAZ.01     | 0.7 | H |   | 0 | general GO |
| transcription_RNA_polyll_promoter (190)             | PLAG1_01   | 0.6 | M | H | H | general GO |
| transcription_RNA_polyll_promoter (190)             | MUSCLE_INI | 0.6 | 0 |   | 0 | general GO |
| transcription_RNA_polyll_promoter (190)             | CDE.01     | 0.6 | H |   |   | general GO |
| transcription_RNA_polyll_promoter (190)             | WHN.01     | 0.6 | H | 0 | M | general GO |
| actin_cytoskeleton_organization_and_biogenesis (45) | GC_rich    | 1   |   |   | 0 | general GO |
| actin_cytoskeleton_organization_and_biogenesis (45) | NRF1_01    | 0.7 |   |   | 0 | general GO |
| anti_apoptosis (85)                                 | NFKAPPAB6  | 0.6 |   |   | 0 | general GO |
| antimicrobial_humoral_response (87)                 | ETS1.01    | 0.5 |   |   | 0 | general GO |
| antimicrobial_humoral_response (87)                 | AREB6.01   | 0.5 |   |   | 0 | general GO |
| antimicrobial_humoral_response (87)                 | GATA1.01   | 0.4 |   |   | 0 | general GO |
| antimicrobial_humoral_response (87)                 | ISRE.01    | 0.4 |   |   | 0 | general GO |
| antimicrobial_humoral_response (87)                 | HMG1Y.01   | 0.4 | M | H | 0 | general GO |
| antimicrobial_humoral_response (87)                 | GATA.01    | 0.4 |   |   | 0 | general GO |
| antimicrobial_humoral_response (87)                 | MTBF.01    | 0.4 |   |   | 0 | general GO |
| antimicrobial_humoral_response (87)                 | CEBPB.01   | 0.4 |   |   | 0 | general GO |
| antimicrobial_humoral_response (87)                 | MEIS1B_HOX | 0.4 |   |   | 0 | general GO |
| antimicrobial_humoral_response (87)                 | OCT1.05    | 0.4 |   | H | 0 | general GO |
| antimicrobial_humoral_response (87)                 | LTATA_01   | 0.4 |   |   | 0 | general GO |
| antimicrobial_humoral_response (87)                 | IRF4.01    | 0.4 |   |   | 0 | general GO |
| antimicrobial_humoral_response (87)                 | GATA1.03   | 0.4 |   |   | 0 | general GO |
| antimicrobial_humoral_response (87)                 | GFI1B.01   | 0.4 |   |   | 0 | general GO |
| antimicrobial_humoral_response (87)                 | CDX2.01    | 0.4 |   | 0 | H | general GO |
| antimicrobial_humoral_response (87)                 | GATA1.05   | 0.4 |   |   | 0 | general GO |
| antimicrobial_humoral_response (87)                 | OCT.01     | 0.4 |   | H | 0 | general GO |
| antimicrobial_humoral_response (87)                 | CDX1.01    | 0.3 |   | 0 | H | general GO |
| antimicrobial_humoral_response (87)                 | FKHRL1.01  | 0.3 |   |   | 0 | general GO |
| antimicrobial_humoral_response (87)                 | HNF6.01    | 0.3 |   | H | 0 | general GO |
| antimicrobial_humoral_response (87)                 | XVENT2.01  | 0.3 |   | 0 | 0 | general GO |
| antimicrobial_humoral_response (87)                 | ATATA.01   | 0.3 |   | H | 0 | general GO |
| antimicrobial_humoral_response (87)                 | CDP.02     | 0.3 |   |   | 0 | general GO |
| antimicrobial_humoral_response (87)                 | MEF2.04    | 0.3 |   |   | 0 | general GO |
| antimicrobial_humoral_response (87)                 | TATA.01    | 0.3 |   | 0 | H | general GO |
| antimicrobial_humoral_response (87)                 | EVI1.03    | 0.2 |   |   | 0 | general GO |
| apoptosis (258)                                     | NFKAPPAB.0 | 0.6 |   |   | 0 | general GO |
| apoptosis (258)                                     | CREL.01    | 0.5 | M | H | 0 | general GO |
| biosynthesis (32)                                   | CAAT.01    | 0.5 |   |   | 0 | general GO |
| biosynthesis (32)                                   | NFY.02     | 0.5 |   |   | 0 | general GO |
| blood_coagulation (70)                              | ARE.01     | 0.5 | M | H | 0 | general GO |
| blood_coagulation (70)                              | BCL6.02    | 0.4 | M | H | 0 | general GO |
| blood_coagulation (70)                              | AIRE.01    | 0.4 | 0 | H | M | general GO |
| blood_coagulation (70)                              | FREAC4.01  | 0.4 |   |   | 0 | general GO |
| blood_coagulation (70)                              | HNF1.02    | 0.3 |   |   | 0 | general GO |
| blood_coagulation (70)                              | FREAC3.01  | 0.3 | H | 0 | M | general GO |
| blood_coagulation (70)                              | HNF1.03    | 0.3 |   |   | 0 | general GO |
| blood_coagulation (70)                              | HNF1.01    | 0.3 |   |   | 0 | general GO |
| blood_coagulation (70)                              | DLX1.01    | 0.3 | M | H | 0 | general GO |
| calcium_ion_homeostasis (30)                        | TATA.01    | 0.3 |   |   | 0 | general GO |
| cation_transport (99)                               | SP1.01     | 0.8 | 0 | H | M | general GO |
| cation_transport (99)                               | ZNF202.01  | 0.7 |   | H | H | general GO |
| cation_transport (99)                               | NFKAPPAB5  | 0.7 | H | 0 | M | general GO |
| cation_transport (99)                               | NRSE.01    | 0.6 | M | 0 | H | general GO |
| cell_adhesion (378)                                 | PDX1_Gabi  | 0.4 | M | H | 0 | general GO |
| cell_cell_signaling (268)                           | NFKAPPAB6  | 0.6 |   | M | 0 | general GO |
| cell_cell_signaling (268)                           | CREL.01    | 0.5 | H | M | 0 | general GO |
| cell_cell_signaling (268)                           | NFKAPPAB.0 | 0.5 |   |   | 0 | general GO |
| cell_cell_signaling (268)                           | HIVEP1_01  | 0.5 | H | M | 0 | general GO |
| cell_cell_signaling (268)                           | MTATA.01   | 0.5 |   |   | 0 | general GO |

|                                                        |            |     |   |   |   |            |
|--------------------------------------------------------|------------|-----|---|---|---|------------|
| cell_cell_signaling (268)                              | AARE.01    | 0.4 |   | 0 | 0 | general GO |
| cell_cell_signaling (268)                              | LTATA_01   | 0.4 |   | 0 | 0 | general GO |
| cell_cell_signaling (268)                              | NFAT.01    | 0.4 |   | 0 | 0 | general GO |
| cell_cell_signaling (268)                              | CDX2.01    | 0.4 |   | 0 | 0 | general GO |
| cell_cell_signaling (268)                              | MEF2.05    | 0.3 |   | 0 | 0 | general GO |
| cell_cell_signaling (268)                              | TATA.01    | 0.3 |   | 0 | 0 | general GO |
| cell_cell_signaling (268)                              | TATA.02    | 0.3 |   | 0 | 0 | general GO |
| cell_cell_signaling (268)                              | BRN2.02    | 0.2 |   | 0 | 0 | general GO |
| cell_cycle (273)                                       | NRF1_01    | 0.7 |   | 0 | 0 | general GO |
| cell_cycle (273)                                       | CDE.01     | 0.6 |   | H | 0 | general GO |
| cell_cycle (273)                                       | E2F.03     | 0.5 | H |   | 0 | general GO |
| cell_cycle (273)                                       | NFY.01     | 0.5 |   |   | 0 | general GO |
| cell_cycle (273)                                       | CAAT.01    | 0.5 |   | H | 0 | general GO |
| cell_cycle (273)                                       | NFY.02     | 0.5 |   | H | 0 | general GO |
| cell_cycle (273)                                       | CREB.01    | 0.5 | H | M | 0 | general GO |
| cell_cycle (273)                                       | NFY.03     | 0.5 |   | H | 0 | general GO |
| cell_cycle (273)                                       | CHR.01     | 0.4 |   | 0 | 0 | general GO |
| cell_differentiation (192)                             | WT1.01     | 0.8 | 0 |   | 0 | general GO |
| cell_division (103)                                    | SP2_01     | 0.6 | H | M | 0 | general GO |
| cell_division (103)                                    | NFY.01     | 0.5 |   | H | 0 | general GO |
| cell_division (103)                                    | CAAT.01    | 0.5 |   | H | 0 | general GO |
| cell_division (103)                                    | NFY.02     | 0.5 |   | 0 | 0 | general GO |
| cell_division (103)                                    | NFY.03     | 0.5 |   | 0 | 0 | general GO |
| cell_division (103)                                    | CHR.01     | 0.4 |   | 0 | 0 | general GO |
| cell_matrix_adhesion (56)                              | HBP1_01    | 0.4 | 0 |   | 0 | general GO |
| cell_motility (106)                                    | TATA.02    | 0.3 |   | 0 | 0 | general GO |
| cell_surface_receptor_linked_signal_transduction (169) | ETS2.01    | 0.5 |   | 0 | 0 | general GO |
| cell_surface_receptor_linked_signal_transduction (169) | AP1.01     | 0.4 |   | H | 0 | general GO |
| cell_surface_receptor_linked_signal_transduction (169) | OCT1.05    | 0.4 |   | 0 | 0 | general GO |
| cell_surface_receptor_linked_signal_transduction (169) | GATA1.05   | 0.4 | H | M | 0 | general GO |
| cell_surface_receptor_linked_signal_transduction (169) | EN1.01     | 0.3 | M | H | 0 | general GO |
| cellular_defense_response (68)                         | NFKAPPAB.0 | 0.5 |   | 0 | 0 | general GO |
| cellular_defense_response (68)                         | GATA1.03   | 0.4 |   | H | 0 | general GO |
| central_nervous_system_development (68)                | MAZR.01    | 0.8 | 0 |   | 0 | general GO |
| central_nervous_system_development (68)                | MUSCLE_INI | 0.6 | 0 |   | 0 | general GO |
| chemotaxis (98)                                        | NFKAPPAB.0 | 0.6 |   | 0 | 0 | general GO |
| chemotaxis (98)                                        | NFKAPPAB.0 | 0.6 |   | 0 | 0 | general GO |
| chemotaxis (98)                                        | NFKAPPAB6  | 0.6 |   | 0 | 0 | general GO |
| chemotaxis (98)                                        | CREL.01    | 0.5 |   | 0 | 0 | general GO |
| chemotaxis (98)                                        | NFKAPPAB.0 | 0.5 |   | 0 | 0 | general GO |
| chemotaxis (98)                                        | HIVEP1_01  | 0.5 |   | 0 | 0 | general GO |
| chemotaxis (98)                                        | NFE2.01    | 0.5 |   | 0 | 0 | general GO |
| chemotaxis (98)                                        | IK3.01     | 0.5 |   | 0 | 0 | general GO |
| chemotaxis (98)                                        | NFE2L2.01  | 0.5 |   | 0 | H | general GO |
| chemotaxis (98)                                        | PXRCAR.01  | 0.5 |   | 0 | 0 | general GO |
| chemotaxis (98)                                        | BARBIE.01  | 0.4 |   | 0 | H | general GO |
| chemotaxis (98)                                        | GATA1.01   | 0.4 |   | 0 | 0 | general GO |
| chemotaxis (98)                                        | MYT1L.01   | 0.4 | H |   | 0 | general GO |
| chemotaxis (98)                                        | TCF11MAFG  | 0.4 |   | 0 | 0 | general GO |
| chemotaxis (98)                                        | AP1.01     | 0.4 |   | 0 | 0 | general GO |
| chemotaxis (98)                                        | SRF.01     | 0.4 |   | 0 | 0 | general GO |
| chemotaxis (98)                                        | HMG1Y.01   | 0.4 |   | H | 0 | general GO |
| chemotaxis (98)                                        | GATA1.04   | 0.4 |   | 0 | 0 | general GO |
| chemotaxis (98)                                        | AIRE.01    | 0.4 |   | H | 0 | general GO |
| chemotaxis (98)                                        | LTATA_01   | 0.4 |   | 0 | 0 | general GO |
| chemotaxis (98)                                        | GATA1.03   | 0.4 |   | H | 0 | general GO |
| chemotaxis (98)                                        | NFAT.01    | 0.4 |   | 0 | 0 | general GO |
| chemotaxis (98)                                        | CDX2.01    | 0.4 |   | H | 0 | general GO |
| chemotaxis (98)                                        | IRF7.01    | 0.4 |   | H | 0 | general GO |
| chemotaxis (98)                                        | GATA2.01   | 0.4 |   | 0 | H | general GO |
| chemotaxis (98)                                        | CDX1.01    | 0.3 |   | 0 | 0 | general GO |
| chemotaxis (98)                                        | GATA3.01   | 0.3 |   | 0 | 0 | general GO |
| chemotaxis (98)                                        | TATA.01    | 0.3 |   | 0 | 0 | general GO |
| chemotaxis (98)                                        | TATA.02    | 0.3 |   | H | H | general GO |

|                                                            |              |     |   |   |   |            |
|------------------------------------------------------------|--------------|-----|---|---|---|------------|
| chromatin_modification (53)                                | WT1.01       | 0.8 | 0 | 0 | 0 | general GO |
| chromatin_modification (53)                                | ZNF202.01    | 0.7 | M | 0 | H | general GO |
| chromatin_modification (53)                                | CKROX_01     | 0.7 |   | 0 | 0 | general GO |
| chromosome_organization_and_biogenesis (83)                | ACAAT.01     | 0.5 |   | 0 | 0 | general GO |
| chromosome_organization_and_biogenesis (83)                | CAAT.01      | 0.5 |   | 0 | 0 | general GO |
| chromosome_organization_and_biogenesis (83)                | NFY.02       | 0.5 |   | H | 0 | general GO |
| chromosome_organization_and_biogenesis (83)                | NFY.03       | 0.5 |   | 0 | 0 | general GO |
| chromosome_organization_and_biogenesis (83)                | BRN2.03      | 0.3 |   | H | H | general GO |
| chromosome_organization_and_biogenesis (83)                | TATA.01      | 0.3 |   | H | 0 | general GO |
| circulation (52)                                           | SRF.01       | 0.4 | 0 | H | M | general GO |
| defense_response (100)                                     | NFKAPPAB.0   | 0.5 |   | 0 | 0 | general GO |
| defense_response (100)                                     | HIVEP1_01    | 0.5 |   | 0 | 0 | general GO |
| defense_response (100)                                     | HOX1-3.01    | 0.4 |   | 0 | 0 | general GO |
| defense_response (100)                                     | PRDM1.01     | 0.4 |   | 0 | 0 | general GO |
| defense_response (100)                                     | CEBPB.01     | 0.4 |   | 0 | 0 | general GO |
| defense_response (100)                                     | HOXA9.01     | 0.3 | 0 | M | H | general GO |
| defense_response (100)                                     | MEF2.04      | 0.3 | 0 |   | 0 | general GO |
| development (530)                                          | GKLF.01      | 0.5 | H |   | 0 | general GO |
| digestion (51)                                             | NFAT.01      | 0.4 |   | 0 | 0 | general GO |
| digestion (51)                                             | MEL1_01      | 0.3 |   | H | 0 | general GO |
| digestion (51)                                             | TATA.01      | 0.3 |   | 0 | 0 | general GO |
| digestion (51)                                             | FREAC7.01    | 0.3 |   | 0 | 0 | general GO |
| digestion (51)                                             | HNF3B.01     | 0.3 |   | 0 | 0 | general GO |
| digestion (51)                                             | EVI1.03      | 0.2 |   | 0 | 0 | general GO |
| DNA_metabolism (47)                                        | E2F.02       | 0.6 |   | 0 | 0 | general GO |
| DNA_metabolism (47)                                        | E2F.03       | 0.5 |   | 0 | 0 | general GO |
| DNA_metabolism (47)                                        | E2F.01       | 0.5 |   | 0 | 0 | general GO |
| DNA_recombination (38)                                     | CAAT.01      | 0.5 |   | 0 | 0 | general GO |
| DNA_recombination (38)                                     | NFY.03       | 0.5 |   | 0 | H | general GO |
| DNA_repair (148)                                           | E2F.02       | 0.6 |   | 0 | 0 | general GO |
| DNA_repair (148)                                           | ELK1.02      | 0.5 |   | 0 | 0 | general GO |
| DNA_repair (148)                                           | E2F.03       | 0.5 |   | 0 | 0 | general GO |
| DNA_repair (148)                                           | FLI.01       | 0.5 |   | 0 | 0 | general GO |
| DNA_repair (148)                                           | E2F.01       | 0.5 |   | 0 | 0 | general GO |
| DNA_replication (91)                                       | NFY.01       | 0.5 |   | 0 | 0 | general GO |
| electron_transport (214)                                   | HNF4.01      | 0.5 |   | 0 | 0 | general GO |
| electron_transport (214)                                   | ERR_01       | 0.5 |   | 0 | 0 | general GO |
| electron_transport (214)                                   | SF1.01       | 0.5 |   | 0 | 0 | general GO |
| electron_transport (214)                                   | PPARA.01     | 0.5 | H | M | 0 | general GO |
| electron_transport (214)                                   | PLZF.01      | 0.5 | 0 |   | 0 | general GO |
| electron_transport (214)                                   | RORA1.01     | 0.4 |   | 0 | 0 | general GO |
| elevation_of_cytosolic_calcium_ion_concentration (37)      | AMEF2.01     | 0.4 |   | 0 | 0 | general GO |
| endocytosis (65)                                           | DEC1.01      | 0.6 |   | 0 | 0 | general GO |
| epidermis_development (59)                                 | HLIN1.01     | 0.6 | 0 | M | H | general GO |
| epidermis_development (59)                                 | BRACH2.01    | 0.5 | H | 0 | M | general GO |
| epidermis_development (59)                                 | AIML3.01     | 0.5 | M | 0 | H | general GO |
| epidermis_development (59)                                 | TAL1TAL1TAL1 | 0.5 |   | 0 | 0 | general GO |
| epidermis_development (59)                                 | TBX5.01      | 0.5 |   | 0 | 0 | general GO |
| epidermis_development (59)                                 | BACH1.01     | 0.5 | H | 0 | M | general GO |
| epidermis_development (59)                                 | AP1.01       | 0.4 | H | 0 | M | general GO |
| epidermis_development (59)                                 | TATA.01      | 0.3 |   | 0 | 0 | general GO |
| epidermis_development (59)                                 | TATA.02      | 0.3 |   | 0 | 0 | general GO |
| ER_to_Golgi_transport (47)                                 | ATF6.02      | 0.6 |   | 0 | 0 | general GO |
| ER_to_Golgi_transport (47)                                 | CREB.02      | 0.6 |   | 0 | 0 | general GO |
| ER_to_Golgi_transport (47)                                 | E4F.01       | 0.5 |   | 0 | 0 | general GO |
| ER_to_Golgi_transport (47)                                 | ATF.02       | 0.5 |   | 0 | 0 | general GO |
| ER_to_Golgi_transport (47)                                 | CREBP1CJU    | 0.4 |   | 0 | 0 | general GO |
| fatty_acid_metabolism (55)                                 | BARX2_01     | 0.3 | 0 | H | M | general GO |
| G_protein_coupled_receptor_protein_signaling_pathway (398) | NRSF.01      | 0.6 | 0 |   | 0 | general GO |
| G_protein_coupled_receptor_protein_signaling_pathway (398) | TAL1BETAIT   | 0.5 | H |   | 0 | general GO |
| G_protein_coupled_receptor_protein_signaling_pathway (398) | MEL1_02      | 0.5 |   | 0 | 0 | general GO |
| G_protein_coupled_receptor_protein_signaling_pathway (398) | COMP1.01     | 0.5 |   | 0 | 0 | general GO |
| G_protein_coupled_receptor_protein_signaling_pathway (398) | BRACH.01     | 0.4 |   | 0 | 0 | general GO |
| G_protein_coupled_receptor_protein_signaling_pathway (398) | TCF11MAFG    | 0.4 |   | 0 | 0 | general GO |

|                                                            |            |     |   |   |   |            |
|------------------------------------------------------------|------------|-----|---|---|---|------------|
| G_protein_coupled_receptor_protein_signaling_pathway (398) | ISL1.01    | 0.4 | H | 0 | 0 | general GO |
| G_protein_coupled_receptor_protein_signaling_pathway (398) | BRN4.01    | 0.4 | 0 | 0 | 0 | general GO |
| G_protein_coupled_receptor_protein_signaling_pathway (398) | GATA1.04   | 0.4 | H | 0 | 0 | general GO |
| G_protein_coupled_receptor_protein_signaling_pathway (398) | FREAC4.01  | 0.4 | H | 0 | 0 | general GO |
| G_protein_coupled_receptor_protein_signaling_pathway (398) | GATA2.02   | 0.4 | H | 0 | 0 | general GO |
| G_protein_coupled_receptor_protein_signaling_pathway (398) | XFD3.01    | 0.4 | 0 | 0 | 0 | general GO |
| G_protein_coupled_receptor_protein_signaling_pathway (398) | GATA2.01   | 0.4 | H | 0 | 0 | general GO |
| G_protein_coupled_receptor_protein_signaling_pathway (398) | GATA3.01   | 0.3 | 0 | 0 | 0 | general GO |
| G_protein_coupled_receptor_protein_signaling_pathway (398) | EVI1.02    | 0.3 | 0 | 0 | 0 | general GO |
| G_protein_coupled_receptor_protein_signaling_pathway (398) | FREAC3.01  | 0.3 | 0 | 0 | 0 | general GO |
| G_protein_coupled_receptor_protein_signaling_pathway (398) | CART1.01   | 0.3 | H | 0 | 0 | general GO |
| G_protein_coupled_receptor_protein_signaling_pathway (398) | EVI1.01    | 0.3 | H | 0 | 0 | general GO |
| G_protein_coupled_receptor_protein_signaling_pathway (398) | MEL1_01    | 0.3 | H | 0 | 0 | general GO |
| G_protein_coupled_receptor_protein_signaling_pathway (398) | EVI1.05    | 0.3 | 0 | 0 | 0 | general GO |
| G_protein_coupled_receptor_protein_signaling_pathway (398) | PIT1.01    | 0.3 | 0 | 0 | 0 | general GO |
| G_protein_coupled_receptor_protein_signaling_pathway (398) | HNF3B.01   | 0.3 | H | 0 | 0 | general GO |
| G_protein_coupled_receptor_protein_signaling_pathway (398) | NKX31.01   | 0.2 | H | H | 0 | general GO |
| G_protein_coupled_receptor_protein_signaling_pathway (398) | BRN2.02    | 0.2 | H | 0 | 0 | general GO |
| G_protein_coupled_receptor_protein_signaling_pathway (398) | EVI1.03    | 0.2 | H | 0 | 0 | general GO |
| G_protein_coupled_receptor_protein_signaling_pathway (398) | AT_rich    | 0   | 0 | 0 | 0 | general GO |
| generation_of_precursor_metabolites_and_energy (85)        | ER.02      | 0.5 | M | 0 | H | general GO |
| homophilic_cell_adhesion (70)                              | NFAT.01    | 0.4 | 0 | 0 | 0 | general GO |
| homophilic_cell_adhesion (70)                              | OCT1P.01   | 0.4 | 0 | H | 0 | general GO |
| immune_response (366)                                      | NFKAPPAB.0 | 0.6 | H | 0 | 0 | general GO |
| immune_response (366)                                      | NFKAPPAB.0 | 0.6 | H | 0 | 0 | general GO |
| immune_response (366)                                      | NFKAPPAB6  | 0.6 | H | 0 | 0 | general GO |
| immune_response (366)                                      | CREL.01    | 0.5 | H | 0 | 0 | general GO |
| immune_response (366)                                      | NFKAPPAB.0 | 0.5 | H | 0 | 0 | general GO |
| immune_response (366)                                      | HIVEP1_01  | 0.5 | H | 0 | 0 | general GO |
| immune_response (366)                                      | AML1.01    | 0.5 | 0 | 0 | 0 | general GO |
| immune_response (366)                                      | PARAXIS_01 | 0.5 | H | 0 | M | general GO |
| immune_response (366)                                      | ETS1.01    | 0.5 | H | 0 | 0 | general GO |
| immune_response (366)                                      | AML3.01    | 0.5 | H | 0 | 0 | general GO |
| immune_response (366)                                      | RBPJK.02   | 0.5 | H | 0 | 0 | general GO |
| immune_response (366)                                      | TAL1ALPHA  | 0.5 | H | 0 | 0 | general GO |
| immune_response (366)                                      | NFE2.01    | 0.5 | 0 | 0 | 0 | general GO |
| immune_response (366)                                      | TR2.01     | 0.5 | 0 | 0 | 0 | general GO |
| immune_response (366)                                      | TAL1BETA   | 0.5 | 0 | 0 | 0 | general GO |
| immune_response (366)                                      | AREB6.01   | 0.5 | M | 0 | H | general GO |
| immune_response (366)                                      | TR4.01     | 0.5 | 0 | 0 | 0 | general GO |
| immune_response (366)                                      | LXRE.01    | 0.5 | 0 | 0 | 0 | general GO |
| immune_response (366)                                      | NKX32.01   | 0.5 | 0 | 0 | 0 | general GO |
| immune_response (366)                                      | ETS2.01    | 0.5 | H | 0 | 0 | general GO |
| immune_response (366)                                      | GRE.01     | 0.5 | 0 | 0 | 0 | general GO |
| immune_response (366)                                      | PAX2.01    | 0.5 | H | 0 | 0 | general GO |
| immune_response (366)                                      | PPARA.01   | 0.5 | H | 0 | 0 | general GO |
| immune_response (366)                                      | NFE2L2.01  | 0.5 | H | 0 | 0 | general GO |
| immune_response (366)                                      | MTATA.01   | 0.5 | 0 | 0 | 0 | general GO |
| immune_response (366)                                      | TAL1BETAIT | 0.5 | 0 | 0 | 0 | general GO |
| immune_response (366)                                      | SRF.03     | 0.5 | H | 0 | 0 | general GO |
| immune_response (366)                                      | BACH1.01   | 0.5 | H | 0 | 0 | general GO |
| immune_response (366)                                      | PLZF.01    | 0.5 | 0 | 0 | 0 | general GO |
| immune_response (366)                                      | AREB6.04   | 0.5 | 0 | 0 | 0 | general GO |
| immune_response (366)                                      | GKLF_02    | 0.5 | 0 | 0 | 0 | general GO |
| immune_response (366)                                      | TAACC.01   | 0.5 | 0 | 0 | 0 | general GO |
| immune_response (366)                                      | STAT6.01   | 0.5 | H | 0 | 0 | general GO |
| immune_response (366)                                      | MIT.01     | 0.5 | 0 | H | 0 | general GO |
| immune_response (366)                                      | MEL1_03    | 0.5 | H | H | 0 | general GO |
| immune_response (366)                                      | RP58.01    | 0.5 | H | 0 | 0 | general GO |
| immune_response (366)                                      | COMP1.01   | 0.5 | 0 | 0 | 0 | general GO |
| immune_response (366)                                      | PXRCAR.01  | 0.5 | H | 0 | 0 | general GO |
| immune_response (366)                                      | BARBIE.01  | 0.4 | H | M | H | general GO |
| immune_response (366)                                      | BRACH.01   | 0.4 | 0 | 0 | 0 | general GO |
| immune_response (366)                                      | PAX8.01    | 0.4 | H | 0 | 0 | general GO |

|                       |           |     |   |   |            |
|-----------------------|-----------|-----|---|---|------------|
| immune_response (366) | GATA1.01  | 0.4 | 0 | H | general GO |
| immune_response (366) | RTR.01    | 0.4 | H | H | general GO |
| immune_response (366) | MYT1L.01  | 0.4 | H | 0 | general GO |
| immune_response (366) | STAT.01   | 0.4 | H | 0 | general GO |
| immune_response (366) | PRE.01    | 0.4 | 0 | 0 | general GO |
| immune_response (366) | TCF11.01  | 0.4 | H | 0 | general GO |
| immune_response (366) | BCL6.02   | 0.4 | 0 | 0 | general GO |
| immune_response (366) | TCF11MAFG | 0.4 | H | 0 | general GO |
| immune_response (366) | ILF1_01   | 0.4 | H | 0 | general GO |
| immune_response (366) | AP1.01    | 0.4 | H | 0 | general GO |
| immune_response (366) | ISRE.01   | 0.4 | M | 0 | general GO |
| immune_response (366) | IRF2.01   | 0.4 | 0 | 0 | general GO |
| immune_response (366) | IRF3.01   | 0.4 | 0 | 0 | general GO |
| immune_response (366) | SRF.01    | 0.4 | 0 | 0 | general GO |
| immune_response (366) | NKX25.01  | 0.4 | 0 | 0 | general GO |
| immune_response (366) | PRDM1.01  | 0.4 | 0 | 0 | general GO |
| immune_response (366) | HMGY.01   | 0.4 | H | 0 | general GO |
| immune_response (366) | PDX1_Gabi | 0.4 | M | H | general GO |
| immune_response (366) | FAST1.01  | 0.4 | H | 0 | general GO |
| immune_response (366) | GATA.01   | 0.4 | H | 0 | general GO |
| immune_response (366) | HBP1_01   | 0.4 | 0 | 0 | general GO |
| immune_response (366) | RORA1.01  | 0.4 | H | 0 | general GO |
| immune_response (366) | GFI1.01   | 0.4 | 0 | M | general GO |
| immune_response (366) | PHOX2_01  | 0.4 | H | 0 | general GO |
| immune_response (366) | PSE_02    | 0.4 | 0 | H | general GO |
| immune_response (366) | BRN4.01   | 0.4 | H | 0 | general GO |
| immune_response (366) | LEF1.02   | 0.4 | H | 0 | general GO |
| immune_response (366) | MTBF.01   | 0.4 | H | 0 | general GO |
| immune_response (366) | IRF1.01   | 0.4 | 0 | 0 | general GO |
| immune_response (366) | CEBPB.01  | 0.4 | H | 0 | general GO |
| immune_response (366) | GATA1.04  | 0.4 | H | 0 | general GO |
| immune_response (366) | OCT1.05   | 0.4 | H | 0 | general GO |
| immune_response (366) | AARE.01   | 0.4 | 0 | 0 | general GO |
| immune_response (366) | AIRE.01   | 0.4 | H | H | general GO |
| immune_response (366) | LTATA_01  | 0.4 | 0 | 0 | general GO |
| immune_response (366) | BRN2.01   | 0.4 | H | 0 | general GO |
| immune_response (366) | IRF4.01   | 0.4 | H | 0 | general GO |
| immune_response (366) | STAT5.01  | 0.4 | 0 | 0 | general GO |
| immune_response (366) | GATA1.03  | 0.4 | H | 0 | general GO |
| immune_response (366) | BCL6.01   | 0.4 | M | 0 | general GO |
| immune_response (366) | OCT1.04   | 0.4 | 0 | 0 | general GO |
| immune_response (366) | GFI1B.01  | 0.4 | 0 | 0 | general GO |
| immune_response (366) | PDX1.01   | 0.4 | 0 | H | general GO |
| immune_response (366) | AMEF2.01  | 0.4 | 0 | 0 | general GO |
| immune_response (366) | RORA2.01  | 0.4 | H | 0 | general GO |
| immune_response (366) | NFAT.01   | 0.4 | 0 | 0 | general GO |
| immune_response (366) | FREAC4.01 | 0.4 | H | 0 | general GO |
| immune_response (366) | CDX2.01   | 0.4 | H | 0 | general GO |
| immune_response (366) | MEF2.01   | 0.4 | H | 0 | general GO |
| immune_response (366) | MMEF2.01  | 0.4 | 0 | 0 | general GO |
| immune_response (366) | GATA2.02  | 0.4 | 0 | H | general GO |
| immune_response (366) | GATA1.05  | 0.4 | H | H | general GO |
| immune_response (366) | XFD3.01   | 0.4 | H | 0 | general GO |
| immune_response (366) | IRF7.01   | 0.4 | 0 | 0 | general GO |
| immune_response (366) | OCT1P.01  | 0.4 | H | 0 | general GO |
| immune_response (366) | OCT.01    | 0.4 | 0 | 0 | general GO |
| immune_response (366) | PDX1_G_SA | 0.4 | H | 0 | general GO |
| immune_response (366) | GATA2.01  | 0.4 | 0 | H | general GO |
| immune_response (366) | CDX1.01   | 0.3 | H | 0 | general GO |
| immune_response (366) | VBP.01    | 0.3 | H | 0 | general GO |
| immune_response (366) | NKX25.02  | 0.3 | H | 0 | general GO |
| immune_response (366) | FREAC2.01 | 0.3 | H | 0 | general GO |
| immune_response (366) | NMP4.01   | 0.3 | 0 | 0 | general GO |
| immune_response (366) | OCT1.02   | 0.3 | H | 0 | general GO |

|                             |             |     |   |   |            |            |
|-----------------------------|-------------|-----|---|---|------------|------------|
| immune_response (366)       | DLX3.01     | 0.3 | H | 0 | general GO |            |
| immune_response (366)       | HOXC13_01   | 0.3 | H | 0 | general GO |            |
| immune_response (366)       | HNF1.02     | 0.3 | H | 0 | general GO |            |
| immune_response (366)       | XFD1.01     | 0.3 | H | 0 | general GO |            |
| immune_response (366)       | GSH2_01     | 0.3 | M | H | 0          | general GO |
| immune_response (366)       | BARX2_01    | 0.3 | H | 0 | general GO |            |
| immune_response (366)       | ATBF1.01    | 0.3 | H | 0 | general GO |            |
| immune_response (366)       | HMEF2.01    | 0.3 | H | 0 | general GO |            |
| immune_response (366)       | GATA3.01    | 0.3 | H | H | general GO |            |
| immune_response (366)       | EVI1.04     | 0.3 | H | 0 | general GO |            |
| immune_response (366)       | EVI1.02     | 0.3 | H | 0 | general GO |            |
| immune_response (366)       | MEIS1_HOXA9 | 0.3 | H | H | general GO |            |
| immune_response (366)       | PBX_HOXA9   | 0.3 | H | H | general GO |            |
| immune_response (366)       | BRN3.02     | 0.3 | H | H | general GO |            |
| immune_response (366)       | FKHRL1.01   | 0.3 | H | 0 | general GO |            |
| immune_response (366)       | BRN2.03     | 0.3 | H | 0 | general GO |            |
| immune_response (366)       | XFD2.01     | 0.3 | H | 0 | general GO |            |
| immune_response (366)       | OC2.01      | 0.3 | H | 0 | general GO |            |
| immune_response (366)       | LMX1B.01    | 0.3 | H | 0 | general GO |            |
| immune_response (366)       | FREAC3.01   | 0.3 | 0 | 0 | general GO |            |
| immune_response (366)       | CART1.01    | 0.3 | H | 0 | general GO |            |
| immune_response (366)       | EN1.01      | 0.3 | H | 0 | general GO |            |
| immune_response (366)       | CABL.01     | 0.3 | H | 0 | general GO |            |
| immune_response (366)       | HNF1.03     | 0.3 | H | 0 | general GO |            |
| immune_response (366)       | EVI1.01     | 0.3 | H | 0 | general GO |            |
| immune_response (366)       | HNF6.01     | 0.3 | H | 0 | general GO |            |
| immune_response (366)       | SOX5.01     | 0.3 | 0 | 0 | general GO |            |
| immune_response (366)       | MSX.01      | 0.3 | M | H | 0          | general GO |
| immune_response (366)       | BRN3.01     | 0.3 | H | 0 | general GO |            |
| immune_response (366)       | ATATA.01    | 0.3 | 0 | 0 | general GO |            |
| immune_response (366)       | EVI1.06     | 0.3 | H | 0 | general GO |            |
| immune_response (366)       | MEF2.02     | 0.3 | H | 0 | general GO |            |
| immune_response (366)       | MEF2.03     | 0.3 | H | 0 | general GO |            |
| immune_response (366)       | HNF1.01     | 0.3 | H | 0 | general GO |            |
| immune_response (366)       | DLX1.01     | 0.3 | H | 0 | general GO |            |
| immune_response (366)       | MEF2.05     | 0.3 | 0 | 0 | general GO |            |
| immune_response (366)       | RSRFC4.02   | 0.3 | H | 0 | general GO |            |
| immune_response (366)       | MEL1_01     | 0.3 | 0 | 0 | general GO |            |
| immune_response (366)       | GATA3.02    | 0.3 | H | H | general GO |            |
| immune_response (366)       | MEF2.04     | 0.3 | 0 | 0 | general GO |            |
| immune_response (366)       | EVI1.05     | 0.3 | H | 0 | general GO |            |
| immune_response (366)       | TATA.01     | 0.3 | 0 | H | general GO |            |
| immune_response (366)       | RSRFC4.01   | 0.3 | 0 | 0 | general GO |            |
| immune_response (366)       | TATA.02     | 0.3 | 0 | H | general GO |            |
| immune_response (366)       | MYT1.02     | 0.3 | H | 0 | general GO |            |
| immune_response (366)       | PIT1.01     | 0.3 | H | 0 | general GO |            |
| immune_response (366)       | FREAC7.01   | 0.3 | H | H | general GO |            |
| immune_response (366)       | HFH1.01     | 0.3 | H | 0 | general GO |            |
| immune_response (366)       | HFH8.01     | 0.3 | H | 0 | general GO |            |
| immune_response (366)       | MYT1.01     | 0.3 | H | 0 | general GO |            |
| immune_response (366)       | OCT1.01     | 0.3 | H | 0 | general GO |            |
| immune_response (366)       | BRN5.01     | 0.3 | H | 0 | general GO |            |
| immune_response (366)       | HNF3B.01    | 0.3 | H | 0 | general GO |            |
| immune_response (366)       | HFH2.01     | 0.3 | H | 0 | general GO |            |
| immune_response (366)       | NKX31.01    | 0.2 | H | 0 | general GO |            |
| immune_response (366)       | BRN2.02     | 0.2 | H | 0 | general GO |            |
| immune_response (366)       | EVI1.03     | 0.2 | H | H | general GO |            |
| immune_response (366)       | S8.01       | 0.2 | M | H | 0          | general GO |
| immune_response (366)       | BRIGHT.01   | 0.2 | H | 0 | general GO |            |
| immune_response (366)       | OCT1.06     | 0.2 | H | H | general GO |            |
| immune_response (366)       | LHX3.01     | 0.1 | H | 0 | general GO |            |
| immune_response (366)       | poly_A      | 0   | H | 0 | general GO |            |
| induction_of_apoptosis (86) | GFI1.01     | 0.4 | 0 | H | M          | general GO |
| induction_of_apoptosis (86) | IRF1.01     | 0.4 | 0 | 0 | 0          | general GO |

|                             |            |     |   |   |   |            |
|-----------------------------|------------|-----|---|---|---|------------|
| inflammatory_response (163) | NFKAPPAB.0 | 0.6 |   | 0 | 0 | general GO |
| inflammatory_response (163) | NFKAPPAB.0 | 0.6 |   | 0 | 0 | general GO |
| inflammatory_response (163) | NFKAPPAB6  | 0.6 |   | 0 | 0 | general GO |
| inflammatory_response (163) | CREL.01    | 0.5 | M | 0 | 0 | general GO |
| inflammatory_response (163) | NFKAPPAB.0 | 0.5 |   | 0 | 0 | general GO |
| inflammatory_response (163) | HIVEP1_01  | 0.5 |   | 0 | 0 | general GO |
| inflammatory_response (163) | AML1.01    | 0.5 | H | 0 | 0 | general GO |
| inflammatory_response (163) | AP1FJ.01   | 0.5 |   | 0 | 0 | general GO |
| inflammatory_response (163) | AP1.02     | 0.5 |   | 0 | 0 | general GO |
| inflammatory_response (163) | LXRE.01    | 0.5 |   | 0 | 0 | general GO |
| inflammatory_response (163) | ETS2.01    | 0.5 |   | 0 | 0 | general GO |
| inflammatory_response (163) | GRE.01     | 0.5 |   | 0 | 0 | general GO |
| inflammatory_response (163) | PPARA.01   | 0.5 | M | H | 0 | general GO |
| inflammatory_response (163) | SRF.03     | 0.5 | H | M | 0 | general GO |
| inflammatory_response (163) | ARE.01     | 0.5 |   | 0 | 0 | general GO |
| inflammatory_response (163) | GKLF_02    | 0.5 | M | H | 0 | general GO |
| inflammatory_response (163) | TAACC.01   | 0.5 |   | H | 0 | general GO |
| inflammatory_response (163) | STAT6.01   | 0.5 |   | 0 | 0 | general GO |
| inflammatory_response (163) | CEBP.02    | 0.5 |   | 0 | 0 | general GO |
| inflammatory_response (163) | CDPCR3.01  | 0.5 | 0 |   | 0 | general GO |
| inflammatory_response (163) | COMP1.01   | 0.5 |   | 0 | H | general GO |
| inflammatory_response (163) | DBP.01     | 0.5 |   | 0 | 0 | general GO |
| inflammatory_response (163) | BARBIE.01  | 0.4 |   | 0 | H | general GO |
| inflammatory_response (163) | GATA1.01   | 0.4 |   | M | 0 | general GO |
| inflammatory_response (163) | MYT1L.01   | 0.4 |   | H | 0 | general GO |
| inflammatory_response (163) | BCL6.02    | 0.4 |   | H | 0 | general GO |
| inflammatory_response (163) | TCF11MAFG  | 0.4 |   | 0 | 0 | general GO |
| inflammatory_response (163) | AP1.01     | 0.4 |   | 0 | 0 | general GO |
| inflammatory_response (163) | ISL1.01    | 0.4 | M | H | 0 | general GO |
| inflammatory_response (163) | ISRE.01    | 0.4 |   | 0 | 0 | general GO |
| inflammatory_response (163) | IRF2.01    | 0.4 |   | 0 | 0 | general GO |
| inflammatory_response (163) | IRF3.01    | 0.4 |   | 0 | 0 | general GO |
| inflammatory_response (163) | SRF.01     | 0.4 |   | M | 0 | general GO |
| inflammatory_response (163) | PRDM1.01   | 0.4 |   | H | 0 | general GO |
| inflammatory_response (163) | HMG1Y.01   | 0.4 |   | H | 0 | general GO |
| inflammatory_response (163) | HBP1_01    | 0.4 | H | 0 |   | general GO |
| inflammatory_response (163) | BRN4.01    | 0.4 |   | 0 | 0 | general GO |
| inflammatory_response (163) | MTBF.01    | 0.4 |   | H | 0 | general GO |
| inflammatory_response (163) | IRF1.01    | 0.4 | M | H | 0 | general GO |
| inflammatory_response (163) | CEBPB.01   | 0.4 |   | H | 0 | general GO |
| inflammatory_response (163) | AARE.01    | 0.4 |   | 0 | 0 | general GO |
| inflammatory_response (163) | AIRE.01    | 0.4 |   | H | 0 | general GO |
| inflammatory_response (163) | LTATA_01   | 0.4 |   | 0 | 0 | general GO |
| inflammatory_response (163) | BRN2.01    | 0.4 |   | 0 | 0 | general GO |
| inflammatory_response (163) | IRF4.01    | 0.4 |   | H | 0 | general GO |
| inflammatory_response (163) | STAT5.01   | 0.4 |   | 0 | H | general GO |
| inflammatory_response (163) | GATA1.03   | 0.4 |   | H | 0 | general GO |
| inflammatory_response (163) | BCL6.01    | 0.4 |   | H | 0 | general GO |
| inflammatory_response (163) | AMEF2.01   | 0.4 |   | 0 | 0 | general GO |
| inflammatory_response (163) | RORA2.01   | 0.4 |   | H | 0 | general GO |
| inflammatory_response (163) | NFAT.01    | 0.4 |   | H | 0 | general GO |
| inflammatory_response (163) | FREAC4.01  | 0.4 | M | H | 0 | general GO |
| inflammatory_response (163) | CDX2.01    | 0.4 |   | H | 0 | general GO |
| inflammatory_response (163) | MEF2.01    | 0.4 | H |   | 0 | general GO |
| inflammatory_response (163) | MMEF2.01   | 0.4 |   | 0 | 0 | general GO |
| inflammatory_response (163) | SOX9.01    | 0.4 | 0 |   | 0 | general GO |
| inflammatory_response (163) | GATA2.02   | 0.4 | H | H | M | general GO |
| inflammatory_response (163) | XFD3.01    | 0.4 |   | 0 | 0 | general GO |
| inflammatory_response (163) | IRF7.01    | 0.4 |   | H | 0 | general GO |
| inflammatory_response (163) | OCT1P.01   | 0.4 |   |   | 0 | general GO |
| inflammatory_response (163) | OCT.01     | 0.4 | H |   | 0 | general GO |
| inflammatory_response (163) | PDX1_G_SA  | 0.4 |   | 0 | 0 | general GO |
| inflammatory_response (163) | CDX1.01    | 0.3 |   | M | 0 | general GO |
| inflammatory_response (163) | FREAC2.01  | 0.3 |   | 0 | 0 | general GO |

|                             |           |     |   |   |   |              |
|-----------------------------|-----------|-----|---|---|---|--------------|
| inflammatory_response (163) | OCT1.02   | 0.3 | 0 | 0 | 0 | general GO   |
| inflammatory_response (163) | DLX3.01   | 0.3 |   |   | 0 | general GO   |
| inflammatory_response (163) | HOXC13_01 | 0.3 | H |   | 0 | general GO   |
| inflammatory_response (163) | HNF1.02   | 0.3 |   |   | 0 | general GO   |
| inflammatory_response (163) | XFD1.01   | 0.3 | H |   | 0 | general GO   |
| inflammatory_response (163) | ATBF1.01  | 0.3 | H |   | 0 | general GO   |
| inflammatory_response (163) | GATA3.01  | 0.3 | H |   | 0 | general GO   |
| inflammatory_response (163) | PAX4.01   | 0.3 |   |   | 0 | general GO   |
| inflammatory_response (163) | EVI1.04   | 0.3 |   |   | 0 | general GO   |
| inflammatory_response (163) | BRN3.02   | 0.3 |   |   | 0 | general GO   |
| inflammatory_response (163) | BRN2.03   | 0.3 |   |   | 0 | general GO   |
| inflammatory_response (163) | XFD2.01   | 0.3 |   |   | 0 | general GO   |
| inflammatory_response (163) | OC2.01    | 0.3 |   |   | 0 | M general GO |
| inflammatory_response (163) | LMX1B.01  | 0.3 | H |   | 0 | general GO   |
| inflammatory_response (163) | CART1.01  | 0.3 | M |   | 0 | general GO   |
| inflammatory_response (163) | EN1.01    | 0.3 | H |   | 0 | general GO   |
| inflammatory_response (163) | HNF1.03   | 0.3 |   |   | 0 | general GO   |
| inflammatory_response (163) | EVI1.01   | 0.3 | H |   | 0 | general GO   |
| inflammatory_response (163) | HNF6.01   | 0.3 | H |   | 0 | general GO   |
| inflammatory_response (163) | BRN3.01   | 0.3 | H | H |   | general GO   |
| inflammatory_response (163) | ATATA.01  | 0.3 |   |   | 0 | general GO   |
| inflammatory_response (163) | MEF2.02   | 0.3 | H |   | 0 | general GO   |
| inflammatory_response (163) | MEF2.03   | 0.3 | H |   | 0 | general GO   |
| inflammatory_response (163) | HNF1.01   | 0.3 |   |   | 0 | general GO   |
| inflammatory_response (163) | MEF2.05   | 0.3 |   |   | 0 | general GO   |
| inflammatory_response (163) | RSRFC4.02 | 0.3 | M |   | 0 | general GO   |
| inflammatory_response (163) | MEL1_01   | 0.3 | H | M |   | general GO   |
| inflammatory_response (163) | GATA3.02  | 0.3 |   |   | 0 | general GO   |
| inflammatory_response (163) | MEF2.04   | 0.3 | H |   | 0 | general GO   |
| inflammatory_response (163) | TATA.01   | 0.3 |   |   | 0 | general GO   |
| inflammatory_response (163) | RSRFC4.01 | 0.3 | M |   | 0 | general GO   |
| inflammatory_response (163) | TATA.02   | 0.3 |   |   | 0 | general GO   |
| inflammatory_response (163) | MYT1.02   | 0.3 | H |   | 0 | general GO   |
| inflammatory_response (163) | PIT1.01   | 0.3 |   |   | 0 | general GO   |
| inflammatory_response (163) | FREAC7.01 | 0.3 | H |   | 0 | general GO   |
| inflammatory_response (163) | SATB1.01  | 0.3 | M |   | 0 | general GO   |
| inflammatory_response (163) | HFH1.01   | 0.3 | H |   | 0 | general GO   |
| inflammatory_response (163) | HFH8.01   | 0.3 | H |   | 0 | general GO   |
| inflammatory_response (163) | MYT1.01   | 0.3 | H |   | 0 | general GO   |
| inflammatory_response (163) | OCT1.01   | 0.3 | H |   | 0 | general GO   |
| inflammatory_response (163) | BRN5.01   | 0.3 |   |   | 0 | general GO   |
| inflammatory_response (163) | HNF3B.01  | 0.3 | H |   | 0 | general GO   |
| inflammatory_response (163) | HFH2.01   | 0.3 | M | H |   | general GO   |
| inflammatory_response (163) | BRN2.02   | 0.2 |   |   | 0 | general GO   |
| inflammatory_response (163) | EVI1.03   | 0.2 | H |   | 0 | general GO   |
| inflammatory_response (163) | BRIGHT.01 | 0.2 |   |   | 0 | general GO   |
| inflammatory_response (163) | OCT1.06   | 0.2 |   |   | 0 | general GO   |
| inflammatory_response (163) | LHX3.01   | 0.1 |   |   | 0 | general GO   |
| inflammatory_response (163) | poly_A    | 0   | H |   | 0 | general GO   |
| innate_immune_response (46) | GRE.01    | 0.5 |   |   | 0 | general GO   |
| innate_immune_response (46) | STAT.01   | 0.4 |   |   | 0 | H general GO |
| innate_immune_response (46) | ISRE.01   | 0.4 |   |   | 0 | general GO   |
| innate_immune_response (46) | IRF3.01   | 0.4 |   |   | 0 | general GO   |
| innate_immune_response (46) | PRDM1.01  | 0.4 | M | H |   | general GO   |
| innate_immune_response (46) | PSE_02    | 0.4 | H |   | 0 | general GO   |
| innate_immune_response (46) | BRN4.01   | 0.4 |   |   | 0 | general GO   |
| innate_immune_response (46) | CDX2.01   | 0.4 |   |   | 0 | H general GO |
| innate_immune_response (46) | MMEF2.01  | 0.4 |   |   | 0 | general GO   |
| innate_immune_response (46) | GATA1.05  | 0.4 | H | M |   | general GO   |
| innate_immune_response (46) | GATA2.01  | 0.4 |   |   | 0 | M general GO |
| innate_immune_response (46) | HNF1.02   | 0.3 |   |   | 0 | H general GO |
| innate_immune_response (46) | ATBF1.01  | 0.3 |   |   | 0 | general GO   |
| innate_immune_response (46) | HMEF2.01  | 0.3 | H | M |   | general GO   |
| innate_immune_response (46) | PAX4.01   | 0.3 |   |   | 0 | general GO   |

|                                                 |            |     |   |   |   |            |
|-------------------------------------------------|------------|-----|---|---|---|------------|
| innate immune response (46)                     | XFD2.01    | 0.3 |   | 0 | H | general GO |
| innate immune response (46)                     | LMX1B.01   | 0.3 |   | 0 | 0 | general GO |
| innate immune response (46)                     | EN1.01     | 0.3 |   | 0 | 0 | general GO |
| innate immune response (46)                     | HNF1.03    | 0.3 |   | 0 | 0 | general GO |
| innate immune response (46)                     | SRY.01     | 0.3 | H | M | 0 | general GO |
| innate immune response (46)                     | BRN3.01    | 0.3 |   | 0 | 0 | general GO |
| innate immune response (46)                     | MEF2.03    | 0.3 |   | 0 | 0 | general GO |
| innate immune response (46)                     | HNF1.01    | 0.3 |   | 0 | 0 | general GO |
| innate immune response (46)                     | RSRFC4.01  | 0.3 |   | 0 | 0 | general GO |
| innate immune response (46)                     | PIT1.01    | 0.3 |   | 0 | H | general GO |
| innate immune response (46)                     | HFH8.01    | 0.3 |   | 0 | 0 | general GO |
| innate immune response (46)                     | OCT1.01    | 0.3 |   | 0 | 0 | general GO |
| innate immune response (46)                     | OCT1.06    | 0.2 | H | M | 0 | general GO |
| intracellular protein transport (191)           | GC_rich    | 1   |   | 0 | 0 | general GO |
| intracellular protein transport (191)           | SP1.01     | 0.8 |   | 0 | 0 | general GO |
| intracellular protein transport (191)           | ZF9.01     | 0.7 |   | 0 | 0 | general GO |
| intracellular protein transport (191)           | NRF1_01    | 0.7 |   | H | 0 | general GO |
| intracellular protein transport (191)           | EGR2.01    | 0.7 | H | M | 0 | general GO |
| intracellular protein transport (191)           | GC.01      | 0.7 |   | 0 | 0 | general GO |
| intracellular protein transport (191)           | ATF6.02    | 0.6 |   | 0 | 0 | general GO |
| intracellular protein transport (191)           | NRSE.01    | 0.6 |   | 0 | 0 | general GO |
| intracellular protein transport (191)           | ATF.01     | 0.6 | H | M | 0 | general GO |
| intracellular protein transport (191)           | XBP1.01    | 0.5 |   | M | H | general GO |
| lipid biosynthesis (54)                         | CAAT.01    | 0.5 |   | 0 | 0 | general GO |
| lipid biosynthesis (54)                         | NFY.02     | 0.5 |   | 0 | 0 | general GO |
| lipid catabolism (41)                           | HNF6.01    | 0.3 | M | H | 0 | general GO |
| lipid transport (41)                            | RORA1.01   | 0.4 |   | 0 | 0 | general GO |
| mitosis (86)                                    | NFY.01     | 0.5 |   | H | 0 | general GO |
| mitosis (86)                                    | CAAT.01    | 0.5 |   | 0 | 0 | general GO |
| mitosis (86)                                    | NFY.02     | 0.5 |   | 0 | 0 | general GO |
| mitosis (86)                                    | NFY.03     | 0.5 |   | 0 | 0 | general GO |
| mitosis (86)                                    | CHR.01     | 0.4 |   | 0 | 0 | general GO |
| morphogenesis (104)                             | GC_rich    | 1   | 0 | 0 |   | general GO |
| morphogenesis (104)                             | AP2.01     | 0.7 | 0 | H |   | general GO |
| morphogenesis (104)                             | ZF5.01     | 0.7 | 0 | 0 |   | general GO |
| morphogenesis (104)                             | HAND2_E12. | 0.7 | M | H | 0 | general GO |
| morphogenesis (104)                             | EGR1.02    | 0.7 | H |   | H | general GO |
| mRNA processing (148)                           | E2F.02     | 0.6 |   | H | 0 | general GO |
| mRNA processing (148)                           | NFY.01     | 0.5 | 0 |   | 0 | general GO |
| muscle contraction (78)                         | MYOD.02    | 0.6 | M | 0 | H | general GO |
| muscle development (107)                        | INSM1_01   | 0.6 |   | 0 | 0 | general GO |
| muscle development (107)                        | HNF4.01    | 0.5 | 0 |   | 0 | general GO |
| muscle development (107)                        | SRF.02     | 0.5 |   | 0 | 0 | general GO |
| muscle development (107)                        | MTATA.01   | 0.5 |   | 0 | 0 | general GO |
| muscle development (107)                        | SRF.03     | 0.5 |   | 0 | 0 | general GO |
| muscle development (107)                        | SRF.01     | 0.4 |   | 0 | 0 | general GO |
| muscle development (107)                        | AMEF2.01   | 0.4 |   | 0 | 0 | general GO |
| muscle development (107)                        | MEF2.02    | 0.3 |   | 0 | 0 | general GO |
| muscle development (107)                        | MEF2.03    | 0.3 |   | 0 | 0 | general GO |
| muscle development (107)                        | RSRFC4.02  | 0.3 |   | 0 | 0 | general GO |
| muscle development (107)                        | RSRFC4.01  | 0.3 |   | 0 | 0 | general GO |
| negative regulation of cell proliferation (130) | PPARA.01   | 0.5 | 0 |   | 0 | general GO |
| nervous system development (225)                | GC_rich    | 1   | H | H |   | general GO |
| nervous system development (225)                | CKROX_01   | 0.7 |   | H |   | general GO |
| nervous system development (225)                | PLAG1_01   | 0.6 | H |   | H | general GO |
| nervous system development (225)                | GAGA.01    | 0.6 |   | H | 0 | general GO |
| nuclear mRNA splicing via spliceosome (94)      | NRF2.01    | 0.6 |   | 0 | 0 | general GO |
| nuclear mRNA splicing via spliceosome (94)      | ATF.02     | 0.5 |   | H | H | general GO |
| nucleosome assembly (71)                        | NFY.01     | 0.5 |   | H | 0 | general GO |
| nucleosome assembly (71)                        | NFY.02     | 0.5 |   | H | 0 | general GO |
| nucleosome assembly (71)                        | NFY.03     | 0.5 |   | 0 | 0 | general GO |
| nucleosome assembly (71)                        | TATA.01    | 0.3 |   | H | 0 | general GO |
| organ morphogenesis (71)                        | poly_C     | 1   | H | M | 0 | general GO |
| organ morphogenesis (71)                        | WT1.01     | 0.8 | 0 |   | H | general GO |

|                                                               |            |     |   |   |   |            |
|---------------------------------------------------------------|------------|-----|---|---|---|------------|
| organ_morphogenesis (71)                                      | INSM1_01   | 0.6 | H | H | M | general GO |
| organ_morphogenesis (71)                                      | GAGA.01    | 0.6 | H | M | 0 | general GO |
| positive_regulation_of_I_kappaB_kinase_NF_kappaB_cascade (56) | ETS1.01    | 0.5 | H | 0 | M | general GO |
| positive_regulation_of_I_kappaB_kinase_NF_kappaB_cascade (56) | IRF3.01    | 0.4 | 0 | 0 | 0 | general GO |
| potassium_ion_transport (108)                                 | WT1.01     | 0.8 | 0 | 0 | 0 | general GO |
| potassium_ion_transport (108)                                 | EGR1.01    | 0.7 | H | M | 0 | general GO |
| potassium_ion_transport (108)                                 | PAX9.01    | 0.6 | 0 | 0 | 0 | general GO |
| pregnancy (41)                                                | PDX1_Gabi  | 0.4 | 0 | 0 | 0 | general GO |
| pregnancy (41)                                                | XFD3.01    | 0.4 | 0 | H | 0 | general GO |
| pregnancy (41)                                                | BRN3.01    | 0.3 | 0 | 0 | 0 | general GO |
| protein_amino_acid_dephosphorylation (96)                     | MUSCLE_INI | 0.6 | 0 | 0 | 0 | general GO |
| protein_amino_acid_phosphorylation (373)                      | SP1.01     | 0.8 | H | 0 | 0 | general GO |
| protein_amino_acid_phosphorylation (373)                      | MTF-1.01   | 0.7 | H | 0 | M | general GO |
| protein_amino_acid_phosphorylation (373)                      | ZNF35_01   | 0.5 | 0 | 0 | 0 | general GO |
| protein_amino_acid_phosphorylation (373)                      | ATF.02     | 0.5 | 0 | 0 | 0 | general GO |
| protein_biosynthesis (197)                                    | GABP.01    | 0.6 | 0 | 0 | 0 | general GO |
| protein_biosynthesis (197)                                    | CDE.01     | 0.6 | H | H | 0 | general GO |
| protein_biosynthesis (197)                                    | WHN.01     | 0.6 | 0 | 0 | 0 | general GO |
| protein_biosynthesis (197)                                    | NRF2.01    | 0.6 | 0 | H | 0 | general GO |
| protein_biosynthesis (197)                                    | ATF.01     | 0.6 | H | M | 0 | general GO |
| protein_biosynthesis (197)                                    | CETS1P54.0 | 0.6 | 0 | 0 | 0 | general GO |
| protein_biosynthesis (197)                                    | YY1.01     | 0.6 | 0 | 0 | 0 | general GO |
| protein_biosynthesis (197)                                    | ELK1.02    | 0.5 | 0 | 0 | 0 | general GO |
| protein_biosynthesis (197)                                    | E2F.03     | 0.5 | H | 0 | 0 | general GO |
| protein_biosynthesis (197)                                    | ELF2.01    | 0.5 | 0 | 0 | 0 | general GO |
| protein_biosynthesis (197)                                    | FLI.01     | 0.5 | 0 | 0 | 0 | general GO |
| protein_biosynthesis (197)                                    | ELK1.01    | 0.5 | 0 | 0 | 0 | general GO |
| protein_biosynthesis (197)                                    | E2F.01     | 0.5 | 0 | 0 | 0 | general GO |
| protein_biosynthesis (197)                                    | ISRE.01    | 0.4 | 0 | 0 | 0 | general GO |
| protein_biosynthesis (197)                                    | HMG1Y.01   | 0.4 | H | M | 0 | general GO |
| protein_biosynthesis (197)                                    | HOXB9_01   | 0.4 | H | M | 0 | general GO |
| protein_folding (149)                                         | FLI.01     | 0.5 | 0 | H | 0 | general GO |
| protein_folding (149)                                         | VMYB.03    | 0.4 | 0 | 0 | 0 | general GO |
| protein_kinase_cascade (43)                                   | E47.01     | 0.6 | 0 | 0 | 0 | general GO |
| protein_targeting (37)                                        | NRF2.01    | 0.6 | 0 | 0 | 0 | general GO |
| protein_transport (254)                                       | GC_rich    | 1   | 0 | 0 | 0 | general GO |
| protein_transport (254)                                       | ZF5.01     | 0.7 | 0 | 0 | 0 | general GO |
| protein_transport (254)                                       | NRF1_01    | 0.7 | 0 | 0 | 0 | general GO |
| protein_transport (254)                                       | EGR1.02    | 0.7 | 0 | 0 | 0 | general GO |
| protein_transport (254)                                       | MUSCLE_INI | 0.6 | 0 | 0 | 0 | general GO |
| protein_transport (254)                                       | GABP.01    | 0.6 | 0 | 0 | 0 | general GO |
| protein_transport (254)                                       | WHN.01     | 0.6 | 0 | H | 0 | general GO |
| protein_transport (254)                                       | NRF2.01    | 0.6 | 0 | H | 0 | general GO |
| protein_transport (254)                                       | CREB.02    | 0.6 | 0 | H | 0 | general GO |
| protein_transport (254)                                       | XBP1.01    | 0.5 | 0 | 0 | H | general GO |
| protein_ubiquitination (118)                                  | MIF1.01    | 0.5 | H | 0 | M | general GO |
| proteolysis (297)                                             | NRL.01     | 0.5 | H | 0 | M | general GO |
| proteolysis (297)                                             | TH1E47.01  | 0.5 | H | M | 0 | general GO |
| proteolysis (297)                                             | AREB6.01   | 0.5 | 0 | H | 0 | general GO |
| proteolysis (297)                                             | COUP.01    | 0.5 | 0 | 0 | 0 | general GO |
| proteolysis (297)                                             | AREB6.02   | 0.5 | 0 | 0 | 0 | general GO |
| proteolysis (297)                                             | AP1.01     | 0.4 | 0 | 0 | 0 | general GO |
| proteolysis (297)                                             | CEBPB.01   | 0.4 | 0 | 0 | 0 | general GO |
| proteolysis (297)                                             | AIRE.01    | 0.4 | 0 | M | H | general GO |
| proteolysis (297)                                             | GATA1.03   | 0.4 | 0 | 0 | 0 | general GO |
| proteolysis (297)                                             | XFD3.01    | 0.4 | 0 | 0 | 0 | general GO |
| proteolysis (297)                                             | ATBF1.01   | 0.3 | 0 | 0 | 0 | general GO |
| proteolysis (297)                                             | HMEF2.01   | 0.3 | M | 0 | H | general GO |
| proteolysis (297)                                             | XFD2.01    | 0.3 | M | H | 0 | general GO |
| proteolysis (297)                                             | HNF1.03    | 0.3 | 0 | 0 | 0 | general GO |
| proteolysis (297)                                             | HNF1.01    | 0.3 | 0 | 0 | 0 | general GO |
| proteolysis (297)                                             | HFH1.01    | 0.3 | 0 | 0 | 0 | general GO |
| proteolysis (297)                                             | HFH8.01    | 0.3 | 0 | H | 0 | general GO |
| proteolysis (297)                                             | HNF3B.01   | 0.3 | 0 | H | 0 | general GO |

|                                                             |            |     |   |   |   |            |
|-------------------------------------------------------------|------------|-----|---|---|---|------------|
| proteolysis (297)                                           | HFH2.01    | 0.3 |   | 0 | 0 | general GO |
| regulation_of_apoptosis (59)                                | IRF3.01    | 0.4 |   | 0 | 0 | general GO |
| regulation_of_cyclin_dependent_protein_kinase_activity (34) | NFY.01     | 0.5 | 0 |   | 0 | general GO |
| regulation_of_progression_through_cell_cycle (217)          | AHRARNT.02 | 0.6 | 0 | M | H | general GO |
| regulation_of_progression_through_cell_cycle (217)          | E2F.01     | 0.5 | H |   | 0 | general GO |
| regulation_of_progression_through_cell_cycle (217)          | HMEF2.01   | 0.3 | M | 0 | H | general GO |
| response_to_DNA_damage_stimulus (117)                       | EGR1.01    | 0.7 | H | H | M | general GO |
| response_to_DNA_damage_stimulus (117)                       | E2F.02     | 0.6 |   | M | 0 | general GO |
| response_to_DNA_damage_stimulus (117)                       | E2F.03     | 0.5 |   | 0 | M | general GO |
| response_to_DNA_damage_stimulus (117)                       | FLI.01     | 0.5 |   | 0 | 0 | general GO |
| response_to_DNA_damage_stimulus (117)                       | E2F.01     | 0.5 |   | M | 0 | general GO |
| response_to_virus (55)                                      | NFKAPPAB.0 | 0.5 |   | 0 | 0 | general GO |
| response_to_virus (55)                                      | HIVEP1_01  | 0.5 |   | 0 | 0 | general GO |
| response_to_virus (55)                                      | ISRE.01    | 0.4 |   | M | 0 | general GO |
| response_to_virus (55)                                      | IRF2.01    | 0.4 |   | H | 0 | general GO |
| response_to_virus (55)                                      | IRF3.01    | 0.4 |   | 0 | 0 | general GO |
| response_to_virus (55)                                      | PRDM1.01   | 0.4 | M |   | H | general GO |
| response_to_virus (55)                                      | HBP1_01    | 0.4 |   | 0 | 0 | general GO |
| response_to_virus (55)                                      | IRF1.01    | 0.4 |   |   | H | general GO |
| response_to_virus (55)                                      | IRF4.01    | 0.4 |   | H | 0 | general GO |
| response_to_virus (55)                                      | GATA1.05   | 0.4 | H |   | 0 | general GO |
| response_to_virus (55)                                      | IRF7.01    | 0.4 |   | 0 | 0 | general GO |
| response_to_virus (55)                                      | TATA.01    | 0.3 |   | H | 0 | general GO |
| RNA_splicing (61)                                           | NRF2.01    | 0.6 |   | 0 | 0 | general GO |
| sensory_perception (201)                                    | NFKAPPAB.0 | 0.6 |   | 0 | 0 | general GO |
| sensory_perception (201)                                    | HIVEP1_01  | 0.5 |   | 0 | 0 | general GO |
| sensory_perception (201)                                    | NBRE.01    | 0.5 |   | 0 | 0 | general GO |
| sensory_perception (201)                                    | NFE2.01    | 0.5 |   | 0 | 0 | general GO |
| sensory_perception (201)                                    | IK2.01     | 0.5 |   | 0 | 0 | general GO |
| sensory_perception (201)                                    | LMO2COM.0  | 0.5 |   | H | 0 | general GO |
| sensory_perception (201)                                    | SRF.03     | 0.5 |   | 0 | 0 | general GO |
| sensory_perception (201)                                    | MIT.01     | 0.5 |   | 0 | 0 | general GO |
| sensory_perception (201)                                    | MEL1_03    | 0.5 |   | H | 0 | general GO |
| sensory_perception (201)                                    | DBP.01     | 0.5 |   | H | 0 | general GO |
| sensory_perception (201)                                    | PAX8.01    | 0.4 |   | H | 0 | general GO |
| sensory_perception (201)                                    | GATA1.01   | 0.4 |   | H | 0 | general GO |
| sensory_perception (201)                                    | AP1.01     | 0.4 |   | 0 | 0 | general GO |
| sensory_perception (201)                                    | SRF.01     | 0.4 |   | 0 | 0 | general GO |
| sensory_perception (201)                                    | RORA1.01   | 0.4 |   | H | 0 | general GO |
| sensory_perception (201)                                    | GFI1.01    | 0.4 |   | H | 0 | general GO |
| sensory_perception (201)                                    | MTBF.01    | 0.4 |   | 0 | 0 | general GO |
| sensory_perception (201)                                    | GATA1.04   | 0.4 |   | H | 0 | general GO |
| sensory_perception (201)                                    | CRX.01     | 0.4 |   | H | 0 | general GO |
| sensory_perception (201)                                    | AARE.01    | 0.4 | H |   | 0 | general GO |
| sensory_perception (201)                                    | LTATA_01   | 0.4 |   | 0 | 0 | general GO |
| sensory_perception (201)                                    | OTX2.01    | 0.4 |   | H | 0 | general GO |
| sensory_perception (201)                                    | GATA1.03   | 0.4 |   | H | 0 | general GO |
| sensory_perception (201)                                    | BCL6.01    | 0.4 | H | M | 0 | general GO |
| sensory_perception (201)                                    | AMEF2.01   | 0.4 | H |   | M | general GO |
| sensory_perception (201)                                    | CDX2.01    | 0.4 |   | H | 0 | general GO |
| sensory_perception (201)                                    | GATA2.02   | 0.4 |   | H | 0 | general GO |
| sensory_perception (201)                                    | XFD3.01    | 0.4 |   | 0 | 0 | general GO |
| sensory_perception (201)                                    | OCT1P.01   | 0.4 |   | H | 0 | general GO |
| sensory_perception (201)                                    | SIX3.01    | 0.4 |   | H | 0 | general GO |
| sensory_perception (201)                                    | PDX1_G_SA  | 0.4 |   | H | H | general GO |
| sensory_perception (201)                                    | GATA2.01   | 0.4 |   | H | H | general GO |
| sensory_perception (201)                                    | CDX1.01    | 0.3 |   | H | 0 | general GO |
| sensory_perception (201)                                    | NKX25.02   | 0.3 |   | H | 0 | general GO |
| sensory_perception (201)                                    | FREAC2.01  | 0.3 | 0 |   | H | general GO |
| sensory_perception (201)                                    | HMEF2.01   | 0.3 |   | H | 0 | general GO |
| sensory_perception (201)                                    | GATA3.01   | 0.3 |   | H | H | general GO |
| sensory_perception (201)                                    | BRN3.02    | 0.3 |   | H | H | general GO |
| sensory_perception (201)                                    | FKHRL1.01  | 0.3 | H |   | H | general GO |
| sensory_perception (201)                                    | XFD2.01    | 0.3 |   |   | H | general GO |

|                                                       |              |     |   |   |   |            |
|-------------------------------------------------------|--------------|-----|---|---|---|------------|
| sensory_perception (201)                              | OC2.01       | 0.3 | H | 0 | 0 | general GO |
| sensory_perception (201)                              | EN1.01       | 0.3 | H | H |   | general GO |
| sensory_perception (201)                              | MEF2.02      | 0.3 | H | 0 | 0 | general GO |
| sensory_perception (201)                              | MEF2.05      | 0.3 | H | 0 | 0 | general GO |
| sensory_perception (201)                              | CDP.02       | 0.3 | H | 0 | 0 | general GO |
| sensory_perception (201)                              | MEL1_01      | 0.3 | H | 0 | 0 | general GO |
| sensory_perception (201)                              | GATA3.02     | 0.3 | H | 0 | 0 | general GO |
| sensory_perception (201)                              | EVI1.05      | 0.3 | H | 0 | 0 | general GO |
| sensory_perception (201)                              | TATA.01      | 0.3 | 0 | 0 | 0 | general GO |
| sensory_perception (201)                              | EVI1.03      | 0.2 | H | 0 | 0 | general GO |
| sensory_perception (201)                              | BRIGHT.01    | 0.2 | H | 0 | 0 | general GO |
| sensory_perception_of_smell (40)                      | NFE2L2.01    | 0.5 | 0 | 0 | 0 | general GO |
| sensory_perception_of_smell (40)                      | GFI1.01      | 0.4 | M | H | 0 | general GO |
| signal_transduction (1189)                            | E47.01       | 0.6 | 0 | H | M | general GO |
| signal_transduction (1189)                            | NFKAPPAB.0   | 0.5 | H | M | 0 | general GO |
| signal_transduction (1189)                            | HNF4.01      | 0.5 | 0 | 0 | 0 | general GO |
| signal_transduction (1189)                            | HIVEP1_01    | 0.5 | M | 0 | 0 | general GO |
| signal_transduction (1189)                            | AML1.01      | 0.5 | 0 | 0 | 0 | general GO |
| signal_transduction (1189)                            | MEL1_02      | 0.5 | 0 | 0 | 0 | general GO |
| signal_transduction (1189)                            | AP1.01       | 0.4 | 0 | 0 | 0 | general GO |
| signal_transduction (1189)                            | AARE.01      | 0.4 | 0 | 0 | 0 | general GO |
| signal_transduction (1189)                            | EVI1.02      | 0.3 | 0 | 0 | 0 | general GO |
| signal_transduction (1189)                            | EVI1.01      | 0.3 | 0 | 0 | 0 | general GO |
| signal_transduction (1189)                            | poly_A       | 0   | 0 | 0 | 0 | general GO |
| skeletal_development (83)                             | AG_rich_codi | 0.5 | 0 | 0 | 0 | general GO |
| small_GTPase_mediated_signal_transduction (124)       | GC_rich      | 1   | H | 0 | 0 | general GO |
| small_GTPase_mediated_signal_transduction (124)       | SP1.01       | 0.8 | H | 0 | 0 | general GO |
| small_GTPase_mediated_signal_transduction (124)       | ZF5.01       | 0.7 | 0 | 0 | 0 | general GO |
| small_GTPase_mediated_signal_transduction (124)       | ZF9.01       | 0.7 | H | 0 | 0 | general GO |
| small_GTPase_mediated_signal_transduction (124)       | EGR3.01      | 0.7 | H | 0 | M | general GO |
| small_GTPase_mediated_signal_transduction (124)       | NRF1_01      | 0.7 | H | 0 | 0 | general GO |
| small_GTPase_mediated_signal_transduction (124)       | CKROX_01     | 0.7 | H | 0 | 0 | general GO |
| small_GTPase_mediated_signal_transduction (124)       | EGR1.02      | 0.7 | H | 0 | 0 | general GO |
| small_GTPase_mediated_signal_transduction (124)       | GC.01        | 0.7 | H | 0 | 0 | general GO |
| small_GTPase_mediated_signal_transduction (124)       | ATF6.01      | 0.6 | H | 0 | M | general GO |
| small_GTPase_mediated_signal_transduction (124)       | PLAG1_01     | 0.6 | H | H | M | general GO |
| small_GTPase_mediated_signal_transduction (124)       | EBVR.01      | 0.6 | 0 | 0 | 0 | general GO |
| sodium_ion_transport (75)                             | FXRE.01      | 0.5 | 0 | 0 | 0 | general GO |
| sodium_ion_transport (75)                             | HNF1.02      | 0.3 | 0 | 0 | 0 | general GO |
| sodium_ion_transport (75)                             | HNF1.03      | 0.3 | 0 | 0 | 0 | general GO |
| sodium_ion_transport (75)                             | HNF1.01      | 0.3 | 0 | 0 | 0 | general GO |
| steroid_biosynthesis (42)                             | NFY.01       | 0.5 | 0 | 0 | 0 | general GO |
| steroid_biosynthesis (42)                             | CAAT.01      | 0.5 | 0 | 0 | 0 | general GO |
| steroid_biosynthesis (42)                             | NFY.02       | 0.5 | 0 | 0 | 0 | general GO |
| steroid_biosynthesis (42)                             | NFY.03       | 0.5 | 0 | 0 | 0 | general GO |
| steroid_biosynthesis (42)                             | GATA1.03     | 0.4 | 0 | H | M | general GO |
| steroid_metabolism (54)                               | HNF3B.01     | 0.3 | 0 | 0 | 0 | general GO |
| synaptic_transmission (153)                           | NRSF.01      | 0.6 | M | 0 | H | general GO |
| synaptic_transmission (153)                           | NRSE.01      | 0.6 | 0 | 0 | H | general GO |
| synaptic_transmission (153)                           | GAGA.01      | 0.6 | H | M | H | general GO |
| transmembrane_receptor_tyrosine_kinase_signaling (65) | E47.01       | 0.6 | 0 | 0 | 0 | general GO |
| transmembrane_receptor_tyrosine_kinase_signaling (65) | GAGA.01      | 0.6 | 0 | 0 | M | general GO |
| transport (940)                                       | ERR_01       | 0.5 | 0 | H | 0 | general GO |
| transport (940)                                       | OTX2.01      | 0.4 | M | 0 | H | general GO |
| transport (940)                                       | HNF1.02      | 0.3 | 0 | 0 | 0 | general GO |
| transport (940)                                       | HNF1.03      | 0.3 | 0 | 0 | 0 | general GO |
| transport (940)                                       | HNF1.01      | 0.3 | 0 | 0 | 0 | general GO |
| ubiquitin_cycle (154)                                 | GC_rich      | 1   | 0 | 0 | 0 | general GO |
| ubiquitin_cycle (154)                                 | HES1.02      | 0.8 | 0 | 0 | 0 | general GO |
| ubiquitin_cycle (154)                                 | ZF5.01       | 0.7 | 0 | 0 | 0 | general GO |
| ubiquitin_cycle (154)                                 | HES1.01      | 0.6 | 0 | 0 | 0 | general GO |
| ubiquitin_cycle (154)                                 | FLI.01       | 0.5 | 0 | 0 | 0 | general GO |
| ubiquitin_cycle (154)                                 | VMYB.05      | 0.4 | 0 | 0 | H | general GO |
| ubiquitin_dependent_protein_catabolism (72)           | IRF2.01      | 0.4 | 0 | 0 | 0 | general GO |

|                                     |           |     |   |   |   |            |
|-------------------------------------|-----------|-----|---|---|---|------------|
| vesicle_mediated_transport (51)     | SP1.01    | 0.8 |   | 0 | 0 | general GO |
| visual_perception (142)             | VMAF.01   | 0.5 |   | 0 | 0 | general GO |
| visual_perception (142)             | TBX5.01   | 0.5 |   | 0 | 0 | general GO |
| visual_perception (142)             | HOX_PBX_0 | 0.5 |   | 0 | 0 | general GO |
| visual_perception (142)             | GFI1.01   | 0.4 |   | 0 | 0 | general GO |
| visual_perception (142)             | CRX.01    | 0.4 |   | 0 | 0 | general GO |
| visual_perception (142)             | OTX2.01   | 0.4 | H | 0 | 0 | general GO |
| visual_perception (142)             | PDX1.01   | 0.4 |   | 0 | 0 | general GO |
| visual_perception (142)             | SIX3.01   | 0.4 | H | 0 | 0 | general GO |
| visual_perception (142)             | OC2.01    | 0.3 | M | H | H | general GO |
| visual_perception (142)             | GATA3.02  | 0.3 |   | 0 | 0 | general GO |
| visual_perception (142)             | HFH1.01   | 0.3 | M | H | 0 | general GO |
| Wnt_receptor_signaling_pathway (66) | GC_rich   | 1   | H | H |   | general GO |
| Wnt_receptor_signaling_pathway (66) | poly_C    | 1   |   | H | H | general GO |
| Wnt_receptor_signaling_pathway (66) | SP1.01    | 0.8 | H | 0 |   | general GO |
| Wnt_receptor_signaling_pathway (66) | WT1.01    | 0.8 |   | 0 | H | general GO |
| Wnt_receptor_signaling_pathway (66) | MAZR.01   | 0.8 |   | 0 | 0 | general GO |
| Wnt_receptor_signaling_pathway (66) | ZNF202.01 | 0.7 |   | 0 | 0 | general GO |
| Wnt_receptor_signaling_pathway (66) | AP2.01    | 0.7 | H | H |   | general GO |
| Wnt_receptor_signaling_pathway (66) | ZF5.01    | 0.7 |   | H |   | general GO |
| Wnt_receptor_signaling_pathway (66) | ZF9.01    | 0.7 | 0 | 0 |   | general GO |
| Wnt_receptor_signaling_pathway (66) | EGR1.02   | 0.7 | H | H |   | general GO |
| Wnt_receptor_signaling_pathway (66) | EGR1.01   | 0.7 | H |   | H | general GO |
| Wnt_receptor_signaling_pathway (66) | PLAG1_01  | 0.6 |   | H | 0 | general GO |
| Wnt_receptor_signaling_pathway (66) | CDE.01    | 0.6 | H | M | 0 | general GO |
| Wnt_receptor_signaling_pathway (66) | PAX9.01   | 0.6 | M | 0 | H | general GO |
| Wnt_receptor_signaling_pathway (66) | NRSE.01   | 0.6 | 0 | M | H | general GO |
| Wnt_receptor_signaling_pathway (66) | PAX5.01   | 0.6 | 0 |   | M | general GO |

700bp Window (with overlap)

[illegible]

|                                           |            |             |   |   |   |   |   |   |   |  |  |  |  |   |   |   |                  |
|-------------------------------------------|------------|-------------|---|---|---|---|---|---|---|--|--|--|--|---|---|---|------------------|
| transcription (930)                       | HELT.01    | 0.691910867 | H | H | H |   |   |   |   |  |  |  |  |   |   |   | transcription GO |
| regulation_of_transcription_DNA_dependent | HELT.01    | 0.691910867 | H | H | H |   |   |   |   |  |  |  |  |   |   |   | transcription GO |
| transcription (930)                       | NGFIC.01   | 0.685824218 |   |   |   | H |   |   |   |  |  |  |  |   |   |   | transcription GO |
| regulation_of_transcription_DNA_dependent | NGFIC.01   | 0.685824218 |   |   |   |   |   |   |   |  |  |  |  |   |   |   | transcription GO |
| development (530)                         | NGFIC.01   | 0.685824218 | M | M |   |   | M | M | M |  |  |  |  |   |   |   | transcription GO |
| transcription (930)                       | CKROX_01   | 0.683333333 |   |   |   |   |   |   |   |  |  |  |  |   |   |   | transcription GO |
| regulation_of_transcription_DNA_dependent | CKROX_01   | 0.683333333 |   |   |   |   |   |   |   |  |  |  |  |   |   |   | transcription GO |
| regulation_of_transcription (266)         | CKROX_01   | 0.683333333 |   |   |   |   |   |   |   |  |  |  |  |   |   |   | transcription GO |
| development (530)                         | CKROX_01   | 0.683333333 |   |   |   |   |   |   |   |  |  |  |  |   |   |   | transcription GO |
| transcription (930)                       | EGR1.02    | 0.683035714 |   |   |   |   |   |   |   |  |  |  |  |   |   |   | transcription GO |
| regulation_of_transcription_DNA_dependent | EGR1.02    | 0.683035714 |   |   |   |   |   |   |   |  |  |  |  |   |   |   | transcription GO |
| regulation_of_transcription (266)         | EGR1.02    | 0.683035714 |   |   |   | M |   |   |   |  |  |  |  |   |   |   | transcription GO |
| development (530)                         | EGR1.02    | 0.683035714 | 0 | 0 | 0 |   |   |   |   |  |  |  |  |   |   |   | transcription GO |
| transcription (930)                       | HIC1_01    | 0.681615155 | 0 | 0 | 0 | 0 |   |   |   |  |  |  |  | M |   |   | transcription GO |
| regulation_of_transcription_DNA_dependent | HIC1_01    | 0.681615155 | 0 | 0 | 0 | M |   |   |   |  |  |  |  |   |   |   | transcription GO |
| regulation_of_transcription (266)         | HIC1_01    | 0.681615155 | 0 | 0 | 0 | 0 | M |   |   |  |  |  |  |   |   |   | transcription GO |
| development (530)                         | HIC1_01    | 0.681615155 | M | M | M |   |   |   |   |  |  |  |  |   |   |   | transcription GO |
| regulation_of_transcription_DNA_dependent | BKLF.01    | 0.681578947 | 0 | 0 | 0 | H |   |   |   |  |  |  |  |   |   |   | transcription GO |
| development (530)                         | BKLF.01    | 0.681578947 | 0 | H | H | H |   |   |   |  |  |  |  | H |   |   | transcription GO |
| transcription (930)                       | EGR2.01    | 0.680134551 |   |   |   | M | M |   |   |  |  |  |  |   |   |   | transcription GO |
| regulation_of_transcription_DNA_dependent | EGR2.01    | 0.680134551 |   |   |   |   |   |   |   |  |  |  |  |   |   |   | transcription GO |
| transcription (930)                       | GC.01      | 0.679856115 | H | 0 | 0 |   |   |   |   |  |  |  |  | M |   |   | transcription GO |
| regulation_of_transcription_DNA_dependent | GC.01      | 0.679856115 | H | 0 | 0 |   |   |   |   |  |  |  |  | M |   |   | transcription GO |
| regulation_of_transcription (266)         | GC.01      | 0.679856115 | 0 | 0 | 0 | M | H | 0 |   |  |  |  |  |   |   |   | transcription GO |
| development (530)                         | GC.01      | 0.679856115 | H | H | H | M |   |   |   |  |  |  |  | M |   |   | transcription GO |
| transcription (930)                       | MZF1.01    | 0.678571429 | M |   |   | M |   |   |   |  |  |  |  | M |   |   | transcription GO |
| regulation_of_transcription_DNA_dependent | MZF1.01    | 0.678571429 |   |   |   | M |   |   |   |  |  |  |  |   |   |   | transcription GO |
| regulation_of_transcription (266)         | MZF1.01    | 0.678571429 |   |   |   |   |   |   |   |  |  |  |  |   |   |   | transcription GO |
| development (530)                         | MZF1.01    | 0.678571429 |   |   |   |   |   |   |   |  |  |  |  |   |   |   | transcription GO |
| transcription (930)                       | EGR1.01    | 0.67232125  | H |   |   |   |   |   |   |  |  |  |  |   |   |   | transcription GO |
| regulation_of_transcription_DNA_dependent | EGR1.01    | 0.67232125  |   |   |   |   |   |   |   |  |  |  |  |   |   |   | transcription GO |
| transcription (930)                       | MTF-1.01   | 0.653230769 |   | 0 | 0 | 0 |   |   |   |  |  |  |  | H | 0 |   | transcription GO |
| regulation_of_transcription_DNA_dependent | MTF-1.01   | 0.653230769 | M | 0 |   |   |   |   |   |  |  |  |  |   | M |   | transcription GO |
| development (530)                         | MTF-1.01   | 0.653230769 | 0 | 0 | 0 | H | 0 | M |   |  |  |  |  |   |   |   | transcription GO |
| transcription (930)                       | MAZ.01     | 0.651515152 |   |   |   |   |   |   |   |  |  |  |  |   |   |   | transcription GO |
| regulation_of_transcription_DNA_dependent | MAZ.01     | 0.651515152 |   |   |   |   |   |   |   |  |  |  |  |   |   |   | transcription GO |
| regulation_of_transcription (266)         | MAZ.01     | 0.651515152 |   |   |   |   |   |   |   |  |  |  |  |   |   |   | transcription GO |
| development (530)                         | MAZ.01     | 0.651515152 | H | H | H |   |   |   |   |  |  |  |  |   |   |   | transcription GO |
| transcription (930)                       | ZIC2_01    | 0.648148148 | 0 | M | 0 | M |   |   |   |  |  |  |  | M |   |   | transcription GO |
| regulation_of_transcription_DNA_dependent | ZIC2_01    | 0.648148148 | M | M | M | M | M |   |   |  |  |  |  |   |   |   | transcription GO |
| regulation_of_transcription (266)         | ZIC2_01    | 0.648148148 | M | M | 0 | H |   |   |   |  |  |  |  |   |   |   | transcription GO |
| development (530)                         | ZIC2_01    | 0.648148148 | 0 | 0 | H |   |   |   |   |  |  |  |  |   |   |   | transcription GO |
| transcription (930)                       | ATF6.01    | 0.639053254 | M | M |   |   |   |   |   |  |  |  |  | H | H |   | transcription GO |
| regulation_of_transcription_DNA_dependent | ATF6.01    | 0.639053254 | M | M |   |   |   |   |   |  |  |  |  |   |   |   | transcription GO |
| transcription (930)                       | PLAG1_01   | 0.63261693  |   |   |   |   |   |   |   |  |  |  |  |   |   |   | transcription GO |
| regulation_of_transcription_DNA_dependent | PLAG1_01   | 0.63261693  |   |   |   |   |   |   |   |  |  |  |  |   |   |   | transcription GO |
| regulation_of_transcription (266)         | PLAG1_01   | 0.63261693  |   |   |   |   |   |   |   |  |  |  |  |   |   |   | transcription GO |
| development (530)                         | PLAG1_01   | 0.63261693  |   |   |   |   |   |   |   |  |  |  |  |   |   |   | transcription GO |
| regulation_of_transcription_DNA_dependent | INSM1_01   | 0.629180602 | 0 | 0 | M | M | M | H |   |  |  |  |  |   |   |   | transcription GO |
| development (530)                         | INSM1_01   | 0.629180602 | H | H | H |   |   |   |   |  |  |  |  |   |   |   | transcription GO |
| regulation_of_transcription_DNA_dependent | EBVR.01    | 0.627594628 | H | H | H | 0 |   |   |   |  |  |  |  | M |   |   | transcription GO |
| transcription (930)                       | AHRARNT.02 | 0.624493927 |   |   |   |   |   |   |   |  |  |  |  | H |   |   | transcription GO |
| regulation_of_transcription_DNA_dependent | AHRARNT.02 | 0.624493927 | 0 | 0 | H |   |   |   |   |  |  |  |  |   |   |   | transcription GO |
| transcription (930)                       | HES1.01    | 0.622222222 |   |   |   |   |   |   |   |  |  |  |  |   |   |   | transcription GO |
| regulation_of_transcription_DNA_dependent | HES1.01    | 0.622222222 |   |   |   |   |   |   |   |  |  |  |  |   |   |   | transcription GO |
| regulation_of_transcription (266)         | HES1.01    | 0.622222222 | 0 | H | 0 | 0 | M | 0 |   |  |  |  |  |   |   |   | transcription GO |
| transcription (930)                       | MUSCLE_INI | 0.620813397 |   |   |   |   |   |   |   |  |  |  |  |   |   | H | transcription GO |
| regulation_of_transcription_DNA_dependent | MUSCLE_INI | 0.620813397 | M |   |   |   |   |   |   |  |  |  |  |   |   |   | transcription GO |
| development (530)                         | MUSCLE_INI | 0.620813397 | H | H |   |   |   |   |   |  |  |  |  |   |   | H | transcription GO |
| transcription (930)                       | NMYC.01    | 0.615909091 | 0 | 0 | 0 |   |   |   |   |  |  |  |  | 0 | 0 |   | transcription GO |
| regulation_of_transcription_DNA_dependent | NMYC.01    | 0.615909091 | 0 | 0 | 0 |   |   |   |   |  |  |  |  | 0 | 0 |   | transcription GO |
| transcription (930)                       | HIF1.01    | 0.607692308 | 0 | 0 | 0 |   |   |   |   |  |  |  |  | H | H |   | transcription GO |
| regulation_of_transcription_DNA_dependent | HIF1.01    | 0.607692308 | 0 | 0 | 0 |   |   |   |   |  |  |  |  | H | H |   | transcription GO |
| transcription (930)                       | MUSCLE_INI | 0.607655502 | H |   |   | H | H |   |   |  |  |  |  |   |   | H | transcription GO |

[illegible]

|                                               |            |             |   |   |   |   |   |   |   |            |
|-----------------------------------------------|------------|-------------|---|---|---|---|---|---|---|------------|
| small_GTPase_mediated_signal_transduction     | GC_rich    | 0.9915      |   |   |   | H | H | 0 |   | general GO |
| regulation_of_transcription_from_RNA_polymera | GC_rich    | 0.9915      |   | H | H | 0 | 0 | 0 |   | general GO |
| regulation_of_progression_through_cell_cycle  | GC_rich    | 0.9915      | 0 | M | 0 | M | H | H |   | general GO |
| protein_transport (254)                       | GC_rich    | 0.9915      |   | H | H | 0 | 0 | 0 |   | general GO |
| nervous_system_development (225)              | GC_rich    | 0.9915      | 0 | H |   | H | 0 | H |   | general GO |
| intracellular_protein_transport (191)         | GC_rich    | 0.9915      |   | H | H | 0 | 0 | 0 |   | general GO |
| Wnt_receptor_signaling_pathway (66)           | poly_C     | 0.989       |   |   |   | H | H | H | H | general GO |
| regulation_of_transcription_from_RNA_polymera | poly_C     | 0.989       | H | H | H | M | 0 | 0 |   | general GO |
| protein_amino_acid_phosphorylation (373)      | poly_C     | 0.989       | 0 | 0 | 0 | 0 |   | H |   | general GO |
| organ_morphogenesis (71)                      | poly_C     | 0.989       | H | H | H | 0 | M | 0 |   | general GO |
| central_nervous_system_development (68)       | poly_C     | 0.989       | 0 | 0 | 0 |   |   | 0 |   | general GO |
| cation_transport (99)                         | poly_C     | 0.989       | 0 | H |   |   | 0 | 0 | 0 | general GO |
| Wnt_receptor_signaling_pathway (66)           | SP1.01     | 0.778846154 | H | H | 0 |   |   |   |   | general GO |
| transcription_RNA_polyll_promoter (190)       | SP1.01     | 0.778846154 | H | H | H |   |   |   |   | general GO |
| small_GTPase_mediated_signal_transduction     | SP1.01     | 0.778846154 |   |   |   |   | H | H | H | general GO |
| regulation_of_transcription_from_RNA_polymera | SP1.01     | 0.778846154 | H | H | 0 | M | 0 | 0 |   | general GO |
| protein_amino_acid_phosphorylation (373)      | SP1.01     | 0.778846154 | 0 | 0 | 0 | 0 |   |   |   | general GO |
| Wnt_receptor_signaling_pathway (66)           | WT1.01     | 0.770561018 | H | H |   | H |   |   |   | general GO |
| transcription_RNA_polyll_promoter (190)       | WT1.01     | 0.770561018 |   | H | H | H | M | M |   | general GO |
| small_GTPase_mediated_signal_transduction     | WT1.01     | 0.770561018 |   |   |   | H | 0 | 0 | 0 | general GO |
| regulation_of_transcription_from_RNA_polymera | WT1.01     | 0.770561018 |   |   | 0 | M | H | H |   | general GO |
| Wnt_receptor_signaling_pathway (66)           | HES1.02    | 0.763263941 | H | 0 | H | M | M | H |   | general GO |
| ubiquitin_cycle (154)                         | HES1.02    | 0.763263941 | H | M | 0 | 0 | 0 | 0 |   | general GO |
| Wnt_receptor_signaling_pathway (66)           | MAZR.01    | 0.762075134 | M | 0 | 0 | H | 0 | H |   | general GO |
| transcription_RNA_polyll_promoter (190)       | MAZR.01    | 0.762075134 | M | 0 | 0 | H | H | 0 |   | general GO |
| small_GTPase_mediated_signal_transduction     | MAZR.01    | 0.762075134 |   |   |   | H | H | H | H | general GO |
| regulation_of_transcription_from_RNA_polymera | MAZR.01    | 0.762075134 | H | H | H | 0 |   | H |   | general GO |
| Wnt_receptor_signaling_pathway (66)           | ZNF202.01  | 0.732919255 |   | H | H |   | 0 | H |   | general GO |
| transcription_RNA_polyll_promoter (190)       | ZNF202.01  | 0.732919255 |   | H | 0 | H |   |   |   | general GO |
| regulation_of_transcription_from_RNA_polymera | ZNF202.01  | 0.732919255 | H | M |   | M | 0 | 0 |   | general GO |
| potassium_ion_transport (108)                 | ZNF202.01  | 0.732919255 | H | H | H |   | H | 0 |   | general GO |
| cation_transport (99)                         | ZNF202.01  | 0.732919255 | 0 |   | M | 0 | 0 | 0 |   | general GO |
| Wnt_receptor_signaling_pathway (66)           | AP2.01     | 0.725490196 | H | H | H |   |   |   |   | general GO |
| transcription_RNA_polyll_promoter (190)       | AP2.01     | 0.725490196 | 0 | 0 | H |   | M |   |   | general GO |
| small_GTPase_mediated_signal_transduction     | AP2.01     | 0.725490196 |   |   |   | H | 0 | 0 |   | general GO |
| morphogenesis (104)                           | AP2.01     | 0.725490196 | 0 | 0 | 0 | H | H |   |   | general GO |
| Wnt_receptor_signaling_pathway (66)           | ZF5.01     | 0.719485294 | M | 0 | H | H | H | H |   | general GO |
| transcription_RNA_polyll_promoter (190)       | ZF5.01     | 0.719485294 | 0 | H |   | 0 | H | H |   | general GO |
| small_GTPase_mediated_signal_transduction     | ZF5.01     | 0.719485294 |   |   | H | 0 | 0 | H |   | general GO |
| regulation_of_progression_through_cell_cycle  | ZF5.01     | 0.719485294 | 0 | 0 | M | M | H | 0 |   | general GO |
| protein_transport (254)                       | ZF5.01     | 0.719485294 |   | H | H | 0 | 0 | 0 |   | general GO |
| protein_biosynthesis (197)                    | ZF5.01     | 0.719485294 | 0 | 0 | 0 |   | M | 0 |   | general GO |
| ubiquitin_cycle (154)                         | ZF9.01     | 0.717844061 | H |   |   | H | 0 | 0 | 0 | general GO |
| small_GTPase_mediated_signal_transduction     | ZF9.01     | 0.717844061 |   |   |   | H | H | H |   | general GO |
| protein_amino_acid_phosphorylation (373)      | ZF9.01     | 0.717844061 | H | H | H |   |   |   |   | general GO |
| organ_morphogenesis (71)                      | ZF9.01     | 0.717844061 | 0 | H | 0 | M | 0 | 0 |   | general GO |
| Wnt_receptor_signaling_pathway (66)           | EGR3.01    | 0.709376693 | 0 | 0 | M | M | H | H |   | general GO |
| small_GTPase_mediated_signal_transduction     | EGR3.01    | 0.709376693 | H | H | 0 | 0 | M | M |   | general GO |
| Wnt_receptor_signaling_pathway (66)           | NRF1_01    | 0.708333333 | H | H | 0 |   | H | H |   | general GO |
| ubiquitin_cycle (154)                         | NRF1_01    | 0.708333333 |   | H | H | H | H | 0 |   | general GO |
| transcription_RNA_polyll_promoter (190)       | NRF1_01    | 0.708333333 | 0 | 0 | M | M | M |   |   | general GO |
| small_GTPase_mediated_signal_transduction     | NRF1_01    | 0.708333333 |   |   | H | H | H | H |   | general GO |
| regulation_of_progression_through_cell_cycle  | NRF1_01    | 0.708333333 | 0 | H | 0 | M | 0 | 0 |   | general GO |
| regulation_of_cyclin_dependent_protein_kinase | NRF1_01    | 0.708333333 | H | H | 0 | M | M | 0 |   | general GO |
| protein_transport (254)                       | NRF1_01    | 0.708333333 |   | H | H | H | 0 | 0 |   | general GO |
| cell_cycle (273)                              | NRF1_01    | 0.708333333 |   |   | H | 0 | 0 | 0 |   | general GO |
| DNA_repair (148)                              | MYCMAX.03  | 0.701731602 |   | H | 0 | 0 | 0 | 0 |   | general GO |
| cation_transport (99)                         | NFKAPPAB5  | 0.7         | 0 | 0 | 0 | H | 0 | M |   | general GO |
| apoptosis (258)                               | NFKAPPAB5  | 0.7         | H |   | H | 0 | H | 0 |   | general GO |
| morphogenesis (104)                           | HAND2_E12. | 0.6957522   | M | 0 | 0 | 0 | H | H |   | general GO |
| lipid_biosynthesis (54)                       | HAND2_E12. | 0.6957522   | 0 | 0 | 0 | 0 | H | M |   | general GO |
| transcription_RNA_polyll_promoter (190)       | ZBP89.01   | 0.695601852 | 0 | 0 | 0 | H | M | 0 |   | general GO |
| transcription_RNA_polyll_promoter (190)       | HELT.01    | 0.691910867 | 0 | 0 | 0 | 0 | H | M |   | general GO |
| DNA_repair (148)                              | HELT.01    | 0.691910867 | H | H | H | 0 |   | 0 |   | general GO |

|                                               |             |             |   |   |   |   |   |   |            |
|-----------------------------------------------|-------------|-------------|---|---|---|---|---|---|------------|
| Wnt_receptor_signaling_pathway (66)           | NGFIC.01    | 0.685824218 | H | H |   |   |   | H | general GO |
| small_GTPase_mediated_signal_transduction     | NGFIC.01    | 0.685824218 |   | H | H | 0 | 0 | M | general GO |
| organ_morphogenesis (71)                      | NGFIC.01    | 0.685824218 | 0 | 0 | 0 | M | M | H | general GO |
| morphogenesis (104)                           | NGFIC.01    | 0.685824218 | 0 | 0 | H | M | 0 | 0 | general GO |
| calcium_ion_transport (62)                    | NGFIC.01    | 0.685824218 | H | H | 0 | M | M | 0 | general GO |
| Wnt_receptor_signaling_pathway (66)           | CKROX_01    | 0.683333333 | H | H | H |   | H | 0 | general GO |
| small_GTPase_mediated_signal_transduction     | CKROX_01    | 0.683333333 |   |   |   | H | 0 | 0 | H          |
| regulation_of_transcription_from_RNA_polymera | CKROX_01    | 0.683333333 | H |   | H |   | H | 0 | general GO |
| nervous_system_development (225)              | CKROX_01    | 0.683333333 | H |   | H | H | H | H | general GO |
| chromatin_modification (53)                   | CKROX_01    | 0.683333333 |   |   | H | H | 0 | 0 | general GO |
| Wnt_receptor_signaling_pathway (66)           | EGR1.02     | 0.683035714 | H | H |   | H |   |   | general GO |
| transcription_RNA_polyll_promoter (190)       | EGR1.02     | 0.683035714 |   | H | H | M | M | M | general GO |
| small_GTPase_mediated_signal_transduction     | EGR1.02     | 0.683035714 |   |   |   |   | H | H | H          |
| regulation_of_transcription_from_RNA_polymera | EGR1.02     | 0.683035714 | H |   |   | M | M | 0 | 0          |
| morphogenesis (104)                           | EGR1.02     | 0.683035714 | H | 0 | H | M | M |   | general GO |
| Wnt_receptor_signaling_pathway (66)           | HIC1_01     | 0.681615155 |   | H | H | H | H | 0 | general GO |
| small_GTPase_mediated_signal_transduction     | HIC1_01     | 0.681615155 | H | H | H | H |   | 0 | general GO |
| potassium_ion_transport (108)                 | HIC1_01     | 0.681615155 | H | H | H |   |   | 0 | general GO |
| organ_morphogenesis (71)                      | HIC1_01     | 0.681615155 | H |   | 0 | 0 | H | H | general GO |
| Wnt_receptor_signaling_pathway (66)           | EGR2.01     | 0.680134551 | 0 | 0 | 0 | M | M | H | general GO |
| transcription_RNA_polyll_promoter (190)       | GC.01       | 0.679856115 | H | 0 | M | H |   | M | general GO |
| small_GTPase_mediated_signal_transduction     | GC.01       | 0.679856115 |   | H | H | H | 0 | 0 | general GO |
| ion_transport (329)                           | MZF1.01     | 0.678571429 | 0 | 0 | 0 | M | H | 0 | general GO |
| Wnt_receptor_signaling_pathway (66)           | EGR1.01     | 0.67232125  | H |   |   | M | M |   | general GO |
| potassium_ion_transport (108)                 | EGR1.01     | 0.67232125  | H |   | M | M | M | 0 | general GO |
| transcription_RNA_polyll_promoter (190)       | MAZ.01      | 0.651515152 | H | H | H |   |   | M | general GO |
| skeletal_development (83)                     | MAZ.01      | 0.651515152 | H | 0 | M | M | 0 | 0 | general GO |
| regulation_of_transcription_from_RNA_polymera | MAZ.01      | 0.651515152 |   |   |   |   |   | 0 | 0          |
| potassium_ion_transport (108)                 | ZIC2_01     | 0.648148148 | 0 | H | 0 | M | 0 | 0 | general GO |
| epidermis_development (59)                    | HEN1.01     | 0.644124164 | 0 | 0 | M | M | M |   | general GO |
| cation_transport (99)                         | HEN1.01     | 0.644124164 | H | M | 0 | 0 | 0 | 0 | general GO |
| transcription_RNA_polyll_promoter (190)       | PLAG1_01    | 0.63261693  | M | 0 | H | H | H | H | general GO |
| regulation_of_transcription_from_RNA_polymera | PLAG1_01    | 0.63261693  | 0 | M | H | M | H | H | general GO |
| organ_morphogenesis (71)                      | PLAG1_01    | 0.63261693  | H | H |   | 0 | 0 | 0 | general GO |
| nervous_system_development (225)              | PLAG1_01    | 0.63261693  | H |   |   |   |   |   | general GO |
| potassium_ion_transport (108)                 | INSM1_01    | 0.629180602 | 0 | M | M | M | M | H | general GO |
| organ_morphogenesis (71)                      | INSM1_01    | 0.629180602 | 0 | H | 0 | H | H | M | general GO |
| ion_transport (329)                           | INSM1_01    | 0.629180602 | 0 | M |   |   | H | H | general GO |
| Wnt_receptor_signaling_pathway (66)           | AHRARNT.02  | 0.624493927 | H | 0 | 0 | M | 0 | 0 | general GO |
| regulation_of_progression_through_cell_cycle  | AHRARNT.02  | 0.624493927 | 0 | 0 | H | H |   | H | general GO |
| protein_transport (254)                       | AHRARNT.02  | 0.624493927 | M | 0 | H | H | 0 | 0 | general GO |
| cell_cycle (273)                              | AHRARNT.01  | 0.623253109 |   |   | M | M | M | 0 | general GO |
| ubiquitin_cycle (154)                         | HES1.01     | 0.622222222 |   | 0 | 0 | 0 | 0 | 0 | general GO |
| protein_biosynthesis (197)                    | HES1.01     | 0.622222222 | 0 | 0 |   | M | 0 | 0 | general GO |
| Wnt_receptor_signaling_pathway (66)           | MUSCLE_INI  | 0.620813397 | H | 0 | 0 |   | H | 0 | general GO |
| small_GTPase_mediated_signal_transduction     | MUSCLE_INI  | 0.620813397 |   | H | H | 0 | 0 | 0 | general GO |
| central_nervous_system_development (68)       | MUSCLE_INI  | 0.620813397 | 0 | M | M |   |   | M | general GO |
| protein_transport (254)                       | GABP.01     | 0.619791667 |   | H | 0 | 0 | 0 | 0 | general GO |
| protein_biosynthesis (197)                    | GABP.01     | 0.619791667 |   |   |   | 0 | 0 | 0 | general GO |
| ER_to_Golgi_transport (47)                    | GABP.01     | 0.619791667 |   | M | H | 0 | 0 | 0 | general GO |
| cell_division (103)                           | GABP.01     | 0.619791667 | H | M | M | 0 | 0 | 0 | general GO |
| synaptic_transmission (153)                   | NRSF.01     | 0.619047619 |   |   |   |   | H | 0 | general GO |
| ion_transport (329)                           | NRSF.01     | 0.619047619 |   | M | M | 0 | 0 | 0 | general GO |
| G_protein_coupled_receptor_protein_signaling  | NRSF.01     | 0.619047619 | H |   | H | H |   | M | general GO |
| transcription_RNA_polyll_promoter (190)       | MUSCLE_INI  | 0.607655502 | 0 | H |   | H | H | H | general GO |
| microtubule_based_movement (38)               | LMO2COM.0   | 0.606926407 | 0 | 0 | 0 | M | 0 | H | general GO |
| signal_transduction (1189)                    | NFKAPPAB.0  | 0.604545455 |   |   |   | H | 0 | 0 | general GO |
| inflammatory_response (163)                   | NFKAPPAB.0  | 0.604545455 |   |   |   |   | 0 | 0 | general GO |
| immune_response (366)                         | NFKAPPAB.0  | 0.604545455 |   |   |   |   | 0 | 0 | general GO |
| chemotaxis (98)                               | NFKAPPAB.0  | 0.604545455 |   |   |   |   | 0 | 0 | general GO |
| cell_cell_signaling (268)                     | NFKAPPAB.0  | 0.604545455 | M | M |   | M | 0 | 0 | general GO |
| apoptosis (258)                               | NFKAPPAB.0  | 0.604545455 |   |   | H | 0 | 0 | 0 | general GO |
| protein_folding (149)                         | ZNF76_143_0 | 0.6         | M | 0 | 0 | 0 | 0 | H | general GO |
| morphogenesis (104)                           | ZNF76_143_0 | 0.6         | 0 | 0 | 0 | 0 |   | H | general GO |

|                                                  |             |             |   |   |   |   |   |   |            |
|--------------------------------------------------|-------------|-------------|---|---|---|---|---|---|------------|
| endocytosis (65)                                 | USF.03      | 0.6         | M | 0 | 0 | 0 | H | 0 | general GO |
| intracellular_protein_transport (191)            | ATF6.02     | 0.596464646 | M |   | H | 0 | 0 | 0 | general GO |
| potassium_ion_transport (108)                    | RREB1.01    | 0.595238095 | 0 | 0 | H | M | 0 | H | general GO |
| ion_transport (329)                              | RREB1.01    | 0.595238095 |   | H | H | H | M | H | general GO |
| Wnt_receptor_signaling_pathway (66)              | CDE.01      | 0.595238095 | H | 0 | 0 |   |   | H | general GO |
| ubiquitin_cycle (154)                            | CDE.01      | 0.595238095 | H |   | H | H | 0 | 0 | general GO |
| transcription_RNA_polyII_promoter (190)          | CDE.01      | 0.595238095 | 0 | 0 | H |   | M | M | general GO |
| small_GTPase_mediated_signal_transduction        | CDE.01      | 0.595238095 |   | H | H | H |   | M | general GO |
| protein_transport (254)                          | CDE.01      | 0.595238095 |   |   |   | H | H | 0 | general GO |
| protein_biosynthesis (197)                       | CDE.01      | 0.595238095 |   | H | H | H | 0 | H | general GO |
| nucleosome_assembly (71)                         | CDE.01      | 0.595238095 | H | M | 0 | 0 | 0 | 0 | general GO |
| nuclear_mRNA_splicing_via_spliceosome (94)       | CDE.01      | 0.595238095 | H |   | H | H | 0 | H | general GO |
| mRNA_processing (148)                            | CDE.01      | 0.595238095 |   |   | H | H | H | H | general GO |
| cell_cycle (273)                                 | CDE.01      | 0.595238095 |   |   | H | H | 0 | 0 | general GO |
| cell_differentiation (192)                       | NEUROD1.01  | 0.594871795 | 0 | 0 | 0 | 0 | 0 | 0 | general GO |
| response_to_DNA_damage_stimulus (117)            | E2F.02      | 0.59375     |   |   | M | M | 0 | 0 | general GO |
| regulation_of_progression_through_cell_cycle     | E2F.02      | 0.59375     | 0 | H | 0 | 0 | 0 | M | general GO |
| DNA_replication (91)                             | E2F.02      | 0.59375     | H | H |   |   | 0 | 0 | general GO |
| DNA_repair (148)                                 | E2F.02      | 0.59375     |   |   | M | M | 0 | 0 | general GO |
| cell_cycle (273)                                 | E2F.02      | 0.59375     |   |   | H | H | 0 | 0 | general GO |
| ubiquitin_cycle (154)                            | WHN.01      | 0.592307692 | H |   | H | H | 0 | 0 | general GO |
| protein_transport (254)                          | WHN.01      | 0.592307692 |   |   | H | 0 | 0 | 0 | general GO |
| protein_biosynthesis (197)                       | WHN.01      | 0.592307692 | H |   |   | H | H |   | general GO |
| cell_division (103)                              | WHN.01      | 0.592307692 |   | M |   |   | H | 0 | general GO |
| cell_cycle (273)                                 | WHN.01      | 0.592307692 |   | 0 | H | H | H | 0 | general GO |
| cholesterol_metabolism (38)                      | AREB6.03    | 0.588541667 | 0 | 0 | H | H | 0 | M | general GO |
| intracellular_protein_transport (191)            | CHREBP_ML   | 0.588235294 | M | 0 | 0 | 0 | 0 | H | general GO |
| DNA_repair (148)                                 | USF.02      | 0.586666667 | H |   | H | 0 | 0 | 0 | general GO |
| protein_transport (254)                          | TAXCREB.01  | 0.584126984 | H | 0 |   | M | 0 | 0 | general GO |
| DNA_repair (148)                                 | MYCMAx.01   | 0.582417582 |   | H | H | H | 0 | 0 | general GO |
| muscle_development (107)                         | AP4.02      | 0.577777778 | 0 | M | M |   | 0 | H | general GO |
| Wnt_receptor_signaling_pathway (66)              | PAX9.01     | 0.574305556 |   |   | H | H | H | 0 | general GO |
| transcription_RNA_polyII_promoter (190)          | PAX9.01     | 0.574305556 | M | M | H | H | 0 | H | general GO |
| RNA_splicing (61)                                | NRF2.01     | 0.572727273 | H | H |   |   | 0 | 0 | general GO |
| protein_transport (254)                          | NRF2.01     | 0.572727273 |   | H | 0 | 0 | 0 | 0 | general GO |
| protein_biosynthesis (197)                       | NRF2.01     | 0.572727273 |   |   |   | M | 0 | 0 | general GO |
| nuclear_mRNA_splicing_via_spliceosome (94)       | NRF2.01     | 0.572727273 |   | H | H | 0 | 0 | 0 | general GO |
| synaptic_transmission (153)                      | NRSE.01     | 0.571957672 |   |   |   | M | H | 0 | general GO |
| ion_transport (329)                              | NRSE.01     | 0.571957672 |   | M | M | 0 | H | 0 | general GO |
| G_protein_coupled_receptor_protein_signaling     | NRSE.01     | 0.571957672 | H | 0 | H | M |   | M | general GO |
| immune_response (366)                            | NF1.02      | 0.570065789 | H | H | 0 | 0 | M | 0 | general GO |
| electron_transport (214)                         | NF1.02      | 0.570065789 | M | M | 0 | H | 0 | 0 | general GO |
| signal_transduction (1189)                       | NFKAPPAB.01 | 0.56884058  |   |   |   | 0 | H | H | general GO |
| sensory_perception (201)                         | NFKAPPAB.01 | 0.56884058  |   |   |   |   |   |   | general GO |
| inflammatory_response (163)                      | NFKAPPAB.01 | 0.56884058  |   |   |   |   |   |   | general GO |
| immune_response (366)                            | NFKAPPAB.01 | 0.56884058  |   |   |   |   |   |   | general GO |
| chemotaxis (98)                                  | NFKAPPAB.01 | 0.56884058  |   |   |   |   |   |   | general GO |
| Wnt_receptor_signaling_pathway (66)              | PAX5.01     | 0.568181818 | 0 | H |   |   | M | 0 | general GO |
| small_GTPase_mediated_signal_transduction        | PAX5.01     | 0.568181818 | M | 0 |   |   | 0 | 0 | general GO |
| potassium_ion_transport (108)                    | PAX5.01     | 0.568181818 | 0 | 0 | H |   | H |   | general GO |
| transmembrane_receptor_tyrosine_kinase_signaling | GAGA.01     | 0.562878788 | M | 0 | 0 | H | 0 | 0 | general GO |
| synaptic_transmission (153)                      | GAGA.01     | 0.562878788 | H | H | 0 | 0 |   | 0 | general GO |
| signal_transduction (1189)                       | GAGA.01     | 0.562878788 | H |   | 0 | H | H | H | general GO |
| potassium_ion_transport (108)                    | GAGA.01     | 0.562878788 | H | H | H |   | 0 | H | general GO |
| nervous_system_development (225)                 | GAGA.01     | 0.562878788 |   | H | 0 | 0 | 0 | 0 | general GO |
| ion_transport (329)                              | GAGA.01     | 0.562878788 | H | H | H |   |   |   | general GO |
| calcium_ion_transport (62)                       | GAGA.01     | 0.562878788 | H | H | H |   |   | H | general GO |
| ion_transport (329)                              | VDR_RXR.01  | 0.561111111 | H | H | H |   | H | H | general GO |
| protein_transport (254)                          | CREB.02     | 0.56        | M |   | H | H | H | H | general GO |
| protein_biosynthesis (197)                       | CREB.02     | 0.56        | 0 |   | H | 0 | 0 | 0 | general GO |
| lipid_transport (41)                             | FTF.01      | 0.557291667 | M | 0 | 0 | H | H | 0 | general GO |
| inflammatory_response (163)                      | NFKAPPAB6   | 0.554545455 |   |   |   |   | 0 | 0 | general GO |
| immune_response (366)                            | NFKAPPAB6   | 0.554545455 |   |   |   |   | H | 0 | general GO |
| chemotaxis (98)                                  | NFKAPPAB6   | 0.554545455 |   |   |   |   | 0 | 0 | general GO |

|                                                 |            |             |   |   |   |   |   |   |            |
|-------------------------------------------------|------------|-------------|---|---|---|---|---|---|------------|
| cell_cell_signaling (268)                       | NFKAPPAB6  | 0.554545455 |   |   |   | M | 0 | 0 | general GO |
| apoptosis (258)                                 | NFKAPPAB6  | 0.554545455 |   |   |   | H | H | 0 | general GO |
| anti_apoptosis (85)                             | NFKAPPAB6  | 0.554545455 | M |   |   | H | 0 | 0 | general GO |
| protein_biosynthesis (197)                      | ATF.01     | 0.554187192 | M | M |   | 0 | 0 | 0 | general GO |
| ER_to_Golgi_transport (47)                      | ATF.01     | 0.554187192 |   |   |   | 0 | 0 | 0 | general GO |
| protein_biosynthesis (197)                      | CETS1P54.0 | 0.552631579 |   |   |   | M | 0 | 0 | general GO |
| regulation_of_progression_through_cell_cycle    | CREB.04    | 0.552083333 | H | H | H | M | 0 | 0 | general GO |
| protein_biosynthesis (197)                      | CREB.04    | 0.552083333 | H |   |   | H | H | H | general GO |
| protein_biosynthesis (197)                      | YY1.01     | 0.550877193 |   |   |   | 0 | 0 | 0 | general GO |
| nuclear_mRNA_splicing_via_spliceosome (94)      | YY1.01     | 0.550877193 | M | H |   | 0 | 0 | H | general GO |
| mRNA_processing (148)                           | YY1.01     | 0.550877193 | M |   |   | 0 | 0 | H | general GO |
| inflammatory_response (163)                     | CREL.01    | 0.547619048 |   |   |   | M | 0 | M | general GO |
| immune_response (366)                           | CREL.01    | 0.547619048 |   |   |   |   | 0 | 0 | general GO |
| chemotaxis (98)                                 | CREL.01    | 0.547619048 |   |   |   | M | M | 0 | general GO |
| apoptosis (258)                                 | CREL.01    | 0.547619048 |   |   |   | M | 0 | 0 | general GO |
| protein_biosynthesis (197)                      | ELK1.02    | 0.547619048 |   |   |   | M | M | 0 | general GO |
| DNA_replication (91)                            | ELK1.02    | 0.547619048 | H | 0 |   | M | 0 | 0 | general GO |
| DNA_repair (148)                                | ELK1.02    | 0.547619048 |   |   |   | M | 0 | 0 | general GO |
| cell_cycle (273)                                | ELK1.02    | 0.547619048 | 0 | 0 | 0 | 0 |   | H | general GO |
| signal_transduction (1189)                      | NFKAPPAB.0 | 0.546218487 | M | M |   | 0 | M | M | general GO |
| inflammatory_response (163)                     | NFKAPPAB.0 | 0.546218487 |   |   |   |   | 0 | 0 | general GO |
| immune_response (366)                           | NFKAPPAB.0 | 0.546218487 |   |   |   | H | H | 0 | general GO |
| chemotaxis (98)                                 | NFKAPPAB.0 | 0.546218487 |   |   |   | H | 0 | 0 | general GO |
| cell_cell_signaling (268)                       | NFKAPPAB.0 | 0.546218487 |   |   |   | M | 0 | 0 | general GO |
| protein_biosynthesis (197)                      | ZNF35_01   | 0.545808967 | H | M |   | 0 | 0 | 0 | general GO |
| regulation_of_progression_through_cell_cycle    | CREB.03    | 0.543859649 | H | 0 | 0 | M | 0 | 0 | general GO |
| protein_folding (149)                           | CREB.03    | 0.543859649 | H |   |   | H | 0 | 0 | general GO |
| protein_biosynthesis (197)                      | CREB.03    | 0.543859649 | H |   |   |   | 0 | 0 | general GO |
| protein_folding (149)                           | MYCMAX.02  | 0.542424242 | H | H | H |   |   | 0 | general GO |
| regulation_of_cyclin_dependent_protein_kinase   | ACAAT.01   | 0.541666667 | 0 | 0 | H |   | 0 | 0 | general GO |
| small_GTPase_mediated_signal_transduction       | NUDR.01    | 0.539697282 | 0 |   |   | 0 | 0 | 0 | general GO |
| protein_biosynthesis (197)                      | NUDR.01    | 0.539697282 | 0 |   |   | M | M | 0 | general GO |
| response_to_DNA_damage_stimulus (117)           | E2F.03     | 0.538461538 |   |   |   | M | M | 0 | general GO |
| regulation_of_progression_through_cell_cycle    | E2F.03     | 0.538461538 | 0 | 0 | 0 |   | M | M | general GO |
| protein_biosynthesis (197)                      | E2F.03     | 0.538461538 |   |   |   | H | H |   | general GO |
| DNA_repair (148)                                | E2F.03     | 0.538461538 |   |   |   | 0 | M | 0 | general GO |
| cell_cycle (273)                                | E2F.03     | 0.538461538 | H |   |   | H | H | 0 | general GO |
| protein_biosynthesis (197)                      | ELF2.01    | 0.536217949 |   |   |   | M | 0 | 0 | general GO |
| ubiquitin_cycle (154)                           | FLI.01     | 0.534588274 |   |   |   |   | 0 | 0 | general GO |
| response_to_DNA_damage_stimulus (117)           | FLI.01     | 0.534588274 |   |   |   |   | 0 | 0 | general GO |
| protein_biosynthesis (197)                      | FLI.01     | 0.534588274 |   |   |   | M | 0 | 0 | general GO |
| DNA_repair (148)                                | FLI.01     | 0.534588274 |   |   |   | H | H | H | general GO |
| Wnt_receptor_signaling_pathway (66)             | HNF4.02    | 0.533333333 | 0 | 0 | M |   |   | 0 | general GO |
| positive_regulation_of_cell_proliferation (103) | NF1.01     | 0.532058119 | H | 0 | 0 | 0 | 0 | 0 | general GO |
| electron_transport (214)                        | NF1.01     | 0.532058119 | H | H | H |   | 0 | 0 | general GO |
| chemotaxis (98)                                 | NF1.01     | 0.532058119 | H | 0 | 0 | 0 | 0 | 0 | general GO |
| electron_transport (214)                        | HNF4.01    | 0.531055901 |   |   |   |   | 0 | 0 | general GO |
| chemotaxis (98)                                 | BACH2.01   | 0.525874126 | 0 | M | H |   | 0 | 0 | general GO |
| response_to_unfolded_protein (40)               | STAT1.01   | 0.524475687 | 0 | 0 | 0 | M | H | 0 | general GO |
| protein_transport (254)                         | STAT1.01   | 0.524475687 | H | H | H | M | 0 | 0 | general GO |
| signal_transduction (1189)                      | HIVEP1_01  | 0.524475524 |   | M | M | M | 0 | 0 | general GO |
| inflammatory_response (163)                     | HIVEP1_01  | 0.524475524 |   |   |   |   | 0 | 0 | general GO |
| immune_response (366)                           | HIVEP1_01  | 0.524475524 |   |   |   | H | H | 0 | general GO |
| chemotaxis (98)                                 | HIVEP1_01  | 0.524475524 |   |   |   | H | H | 0 | general GO |
| cell_cell_signaling (268)                       | HIVEP1_01  | 0.524475524 |   |   |   | M | M | 0 | general GO |
| signal_transduction (1189)                      | AML1.01    | 0.520833333 | 0 |   |   | 0 | M | 0 | general GO |
| pregnancy (41)                                  | AML1.01    | 0.520833333 | M | M |   | 0 | 0 | H | general GO |
| immune_response (366)                           | AML1.01    | 0.520833333 |   |   |   | H | H | 0 | general GO |
| chemotaxis (98)                                 | AML1.01    | 0.520833333 | H |   |   | 0 | 0 | 0 | general GO |
| proton_transport (41)                           | T3R.01     | 0.520634921 | 0 | 0 | H | 0 | H |   | general GO |
| microtubule_based_movement (38)                 | T3R.01     | 0.520634921 | M | 0 | M | M | H | 0 | general GO |
| blood_coagulation (70)                          | T3R.01     | 0.520634921 | 0 | H | H | H | 0 | M | general GO |
| transport (940)                                 | ERR_01     | 0.519924812 | M | H | H | H | H | H | general GO |
| generation_of_precursor_metabolites_and_ener    | ERR_01     | 0.519924812 | M |   |   | M | 0 | 0 | general GO |

|                                               |              |             |   |   |   |   |   |   |            |
|-----------------------------------------------|--------------|-------------|---|---|---|---|---|---|------------|
| amino_acid_metabolism (45)                    | ERR.01       | 0.519924812 | H | H | M | 0 | 0 | 0 | general GO |
| immune_response (366)                         | PARAXIS.01   | 0.51879085  | H | 0 | M | M | M | M | general GO |
| defense_response (100)                        | PARAXIS.01   | 0.51879085  | 0 | H | H | H |   |   | general GO |
| cell_cell_signaling (268)                     | PARAXIS.01   | 0.51879085  | 0 |   | M | M | 0 | 0 | general GO |
| visual_perception (142)                       | VMAF.01      | 0.518467852 |   | H | 0 | 0 | 0 | 0 | general GO |
| steroid_biosynthesis (42)                     | NFY.01       | 0.518088822 |   | H | H | H | 0 | 0 | general GO |
| regulation_of_cyclin_dependent_protein_kinase | NFY.01       | 0.518088822 | H | H | H |   | M | 0 | general GO |
| mRNA_processing (148)                         | NFY.01       | 0.518088822 | 0 | 0 | 0 | H | M | M | general GO |
| mitosis (86)                                  | NFY.01       | 0.518088822 |   |   |   | H | 0 | 0 | general GO |
| DNA_replication (91)                          | NFY.01       | 0.518088822 |   | H | H | 0 | 0 | 0 | general GO |
| cell_division (103)                           | NFY.01       | 0.518088822 |   |   |   |   | 0 | 0 | general GO |
| cell_cycle (273)                              | NFY.01       | 0.518088822 |   |   |   |   | H | 0 | general GO |
| epidermis_development (59)                    | E47.02       | 0.517307692 |   | 0 | 0 | H | H | 0 | general GO |
| cell_proliferation (243)                      | E47.02       | 0.517307692 | 0 | 0 | M | M |   | M | general GO |
| immune_response (366)                         | ETS1.01      | 0.516363636 |   | H | H | H | 0 | 0 | general GO |
| antimicrobial_humoral_response (87)           | ETS1.01      | 0.516363636 | M |   | H | 0 | 0 | 0 | general GO |
| protein_biosynthesis (197)                    | ELK1.01      | 0.515625    |   |   |   |   | 0 | 0 | general GO |
| sodium_ion_transport (75)                     | FXRE.01      | 0.512820513 | 0 | M |   | M | M | H | general GO |
| apoptosis (258)                               | AP1FJ.01     | 0.507936508 | 0 | 0 |   | H | H | 0 | general GO |
| protein_transport (254)                       | E4F.01       | 0.505787037 | M | M | 0 | 0 | 0 | H | general GO |
| visual_perception (142)                       | NRL.01       | 0.505639098 | H | H | M | 0 | 0 | 0 | general GO |
| cholesterol_metabolism (38)                   | TEF1.01      | 0.505208333 | H | H | 0 | 0 | 0 | M | general GO |
| proteolysis (297)                             | TH1E47.01    | 0.505050505 |   | M | M | M | 0 | 0 | general GO |
| immune_response (366)                         | AML3.01      | 0.503401361 |   |   |   | H | 0 | 0 | general GO |
| cellular_defense_response (68)                | AML3.01      | 0.503401361 | H | H | H |   | H | M | general GO |
| inflammatory_response (163)                   | RBPJK.02     | 0.501754386 |   | H | H | 0 | 0 | 0 | general GO |
| skeletal_development (83)                     | AG_rich_codi | 0.5         | H |   | H | 0 | 0 | 0 | general GO |
| lipid_metabolism (196)                        | NBRE.01      | 0.5         |   | H | H | H | H | 0 | general GO |
| immune_response (366)                         | NBRE.01      | 0.5         |   | M | M | 0 | 0 | 0 | general GO |
| signal_transduction (1189)                    | TAL1ALPHA    | 0.497212739 | M |   | M | 0 | 0 | 0 | general GO |
| muscle_development (107)                      | TAL1ALPHA    | 0.497212739 | 0 | 0 | H | M | 0 | 0 | general GO |
| inflammatory_response (163)                   | TAL1ALPHA    | 0.497212739 | M | H | M | 0 | 0 | 0 | general GO |
| epidermis_development (59)                    | TAL1ALPHA    | 0.497212739 |   | 0 | 0 | 0 | 0 | 0 | general GO |
| cell_cell_signaling (268)                     | TAL1ALPHA    | 0.497212739 | 0 | H | M | 0 | 0 | 0 | general GO |
| immune_response (366)                         | NFE2.01      | 0.496503497 |   | H | H | H | H | H | general GO |
| chemotaxis (98)                               | NFE2.01      | 0.496503497 |   | H | 0 | 0 | 0 | 0 | general GO |
| response_to_DNA_damage_stimulus (117)         | E2F.01       | 0.496296296 |   |   |   |   | M | M | general GO |
| DNA_repair (148)                              | E2F.01       | 0.496296296 |   |   |   |   | M | 0 | general GO |
| cell_cycle (273)                              | E2F.01       | 0.496296296 | H | H | H | 0 | 0 | M | general GO |
| protein_folding (149)                         | SRF.02       | 0.494285714 | 0 | 0 | H | H | 0 | M | general GO |
| muscle_development (107)                      | SRF.02       | 0.494285714 |   |   |   | H | 0 | 0 | general GO |
| immune_response (366)                         | AP1.02       | 0.49382716  |   | H |   | H | H | H | general GO |
| chemotaxis (98)                               | AP1.02       | 0.49382716  |   |   | M | 0 | 0 | 0 | general GO |
| protein_transport (254)                       | ATF.02       | 0.493506494 | M | M | H | 0 | 0 | 0 | general GO |
| intracellular_protein_transport (191)         | ATF.02       | 0.493506494 | M | M | 0 | H | H | 0 | general GO |
| cell_cycle (273)                              | ATF.02       | 0.493506494 | 0 | 0 |   | M | 0 | 0 | general GO |
| epidermis_development (59)                    | TBX5.01      | 0.492603182 |   | H | H | M | 0 | 0 | general GO |
| sensory_perception (201)                      | TR2.01       | 0.490909091 |   | H | H | H | H |   | general GO |
| excretion (35)                                | TR2.01       | 0.490909091 | H |   | M |   | M | 0 | general GO |
| steroid_biosynthesis (42)                     | CAAT.01      | 0.489080752 |   |   |   | H | 0 | 0 | general GO |
| regulation_of_cyclin_dependent_protein_kinase | CAAT.01      | 0.489080752 | H | H |   |   | 0 | 0 | general GO |
| mitosis (86)                                  | CAAT.01      | 0.489080752 |   |   |   | 0 | 0 | 0 | general GO |
| chromosome_organization_and_biogenesis (83)   | CAAT.01      | 0.489080752 |   | H | H | H | 0 | 0 | general GO |
| cell_division (103)                           | CAAT.01      | 0.489080752 |   |   |   |   | 0 | 0 | general GO |
| cell_cycle (273)                              | CAAT.01      | 0.489080752 |   |   |   | M | 0 | 0 | general GO |
| biosynthesis (32)                             | CAAT.01      | 0.489080752 |   | H | H | H | 0 | 0 | general GO |
| signal_transduction (1189)                    | TAL1BETAE4   | 0.488324176 | 0 | H | H | M | M | 0 | general GO |
| sensory_perception (201)                      | TAL1BETAE4   | 0.488324176 | H |   | H | H | 0 | H | general GO |
| inflammatory_response (163)                   | TAL1BETAE4   | 0.488324176 | M | M | H | 0 | 0 | 0 | general GO |
| immune_response (366)                         | TAL1BETAE4   | 0.488324176 |   |   |   |   | 0 | 0 | general GO |
| G_protein_coupled_receptor_protein_signaling  | TAL1BETAE4   | 0.488324176 | M |   |   | M | 0 | 0 | general GO |
| cell_cell_signaling (268)                     | TAL1BETAE4   | 0.488324176 |   |   |   | M | 0 | 0 | general GO |
| ubiquitin_cycle (154)                         | CMYB.02      | 0.488290398 | 0 | 0 | M | M | H | H | general GO |
| cell_cycle (273)                              | CMYB.02      | 0.488290398 | H |   |   | 0 | 0 | H | general GO |

|                                                 |            |             |   |   |   |   |   |   |            |
|-------------------------------------------------|------------|-------------|---|---|---|---|---|---|------------|
| metabolism (241)                                | IK3.01     | 0.48806366  | 0 | 0 | M | 0 |   | H | general GO |
| elevation_of_cytosolic_calcium_ion_concentratio | AREB6.01   | 0.485576923 | 0 | M | H | 0 | 0 | 0 | general GO |
| transport (940)                                 | TR4.01     | 0.484188034 | H | H | M |   | H | H | general GO |
| lipid_metabolism (196)                          | TR4.01     | 0.484188034 | H | H | 0 |   | 0 | 0 | general GO |
| transport (940)                                 | COUP.01    | 0.483193277 | 0 | M | 0 | H | 0 | H | general GO |
| metabolism (241)                                | COUP.01    | 0.483193277 | M | H | 0 | 0 | H | 0 | general GO |
| fatty_acid_metabolism (55)                      | COUP.01    | 0.483193277 | H |   | M | 0 | 0 | 0 | general GO |
| sensory_perception (201)                        | LEF1.01    | 0.482102273 | H | H | M | 0 | 0 | 0 | general GO |
| immune_response (366)                           | LEF1.01    | 0.482102273 |   |   |   | H | H | 0 | general GO |
| protein_kinase_cascade (43)                     | PU1.01     | 0.480025183 | 0 | M | M | M | M |   | general GO |
| inflammatory_response (163)                     | PU1.01     | 0.480025183 | 0 | 0 | M |   |   | 0 | general GO |
| immune_response (366)                           | PU1.01     | 0.480025183 | H | H |   | 0 | 0 | 0 | general GO |
| inflammatory_response (163)                     | ETS2.01    | 0.478021978 |   |   |   | 0 | 0 | 0 | general GO |
| immune_response (366)                           | ETS2.01    | 0.478021978 |   |   |   | 0 | 0 | 0 | general GO |
| chemotaxis (98)                                 | ETS2.01    | 0.478021978 | M |   | H | 0 | 0 | 0 | general GO |
| cellular_defense_response (68)                  | ETS2.01    | 0.478021978 |   | M | M | 0 | 0 | 0 | general GO |
| cell_surface_receptor_linked_signal_transductio | ETS2.01    | 0.478021978 |   |   |   | 0 | 0 | 0 | general GO |
| steroid_biosynthesis (42)                       | NFY.02     | 0.477272727 |   |   |   | H | 0 | 0 | general GO |
| mitosis (86)                                    | NFY.02     | 0.477272727 |   |   |   | M | 0 | 0 | general GO |
| chromosome_organization_and_biogenesis (83)     | NFY.02     | 0.477272727 | H | H | H | 0 | 0 | 0 | general GO |
| cell_division (103)                             | NFY.02     | 0.477272727 |   |   |   | 0 | 0 | 0 | general GO |
| cell_cycle (273)                                | NFY.02     | 0.477272727 |   |   |   | H | 0 | 0 | general GO |
| biosynthesis (32)                               | NFY.02     | 0.477272727 |   |   |   | H | 0 | 0 | general GO |
| intracellular_protein_transport (191)           | CREB.01    | 0.477272727 | M | M | 0 | 0 | 0 | H | general GO |
| protein_transport (254)                         | XBP1.01    | 0.473873874 | M | M | 0 | 0 | 0 | H | general GO |
| intracellular_protein_transport (191)           | XBP1.01    | 0.473873874 | M | M | 0 | 0 | H | H | general GO |
| innate_immune_response (46)                     | GRE.01     | 0.473684211 |   |   |   | 0 | 0 | 0 | general GO |
| immune_response (366)                           | GRE.01     | 0.473684211 |   | H | H | 0 | 0 | 0 | general GO |
| cell_surface_receptor_linked_signal_transductio | GRE.01     | 0.473684211 | 0 | M | 0 | H | H | 0 | general GO |
| immune_response (366)                           | PAX2.01    | 0.473429952 |   | H | H | H | 0 | 0 | general GO |
| sensory_perception (201)                        | AP1.03     | 0.473251029 | H | 0 | 0 | 0 | 0 | 0 | general GO |
| immune_response (366)                           | AP1.03     | 0.473251029 | H | H | H | H | H |   | general GO |
| chemotaxis (98)                                 | AP1.03     | 0.473251029 | M |   | M | 0 | 0 | 0 | general GO |
| cellular_defense_response (68)                  | AP1.03     | 0.473251029 | 0 | 0 | H | 0 | H | M | general GO |
| electron_transport (214)                        | PPARA.01   | 0.472727273 |   | M | M | 0 | 0 | 0 | general GO |
| chemotaxis (98)                                 | PPARA.01   | 0.472727273 | 0 | 0 | 0 | 0 | M | H | general GO |
| immune_response (366)                           | NFE2L2.01  | 0.470833333 |   | H | H | H | H | 0 | general GO |
| electron_transport (214)                        | NFE2L2.01  | 0.470833333 |   |   |   | 0 | 0 | 0 | general GO |
| chemotaxis (98)                                 | NFE2L2.01  | 0.470833333 |   |   |   | H | 0 | 0 | general GO |
| signal_transduction (1189)                      | TAL1BETAIT | 0.46978022  | M | H |   | M | M | 0 | general GO |
| immune_response (366)                           | TAL1BETAIT | 0.46978022  |   |   |   |   |   | 0 | general GO |
| G_protein_coupled_receptor_protein_signaling_   | TAL1BETAIT | 0.46978022  |   |   |   | M | 0 | 0 | general GO |
| cell_cell_signaling (268)                       | TAL1BETAIT | 0.46978022  |   | H | M | 0 | 0 | 0 | general GO |
| cell_adhesion (378)                             | TAL1BETAIT | 0.46978022  | H | 0 | 0 |   | H | H | general GO |
| mRNA_processing (148)                           | NFY.03     | 0.46875     | H | H | H | 0 | M | M | general GO |
| mitosis (86)                                    | NFY.03     | 0.46875     |   |   |   | M | 0 | 0 | general GO |
| chromosome_organization_and_biogenesis (83)     | NFY.03     | 0.46875     |   | H | H | H | 0 | 0 | general GO |
| cell_division (103)                             | NFY.03     | 0.46875     |   |   |   | M | 0 | 0 | general GO |
| cell_cycle (273)                                | NFY.03     | 0.46875     |   |   |   | M | 0 | 0 | general GO |
| sensory_perception (201)                        | SRF.03     | 0.468253968 |   |   |   | H | H | 0 | general GO |
| muscle_development (107)                        | SRF.03     | 0.468253968 |   |   |   | H | H | 0 | general GO |
| inflammatory_response (163)                     | SRF.03     | 0.468253968 |   |   |   | H | 0 | 0 | general GO |
| immune_response (366)                           | SRF.03     | 0.468253968 | H |   |   |   |   | 0 | general GO |
| immune_response (366)                           | BACH1.01   | 0.467741935 |   |   |   | H | H | H | general GO |
| epidermis_development (59)                      | BACH1.01   | 0.467741935 | H | 0 | M | M | M | M | general GO |
| electron_transport (214)                        | PLZF.01    | 0.467532468 |   |   |   | H | 0 | 0 | general GO |
| immune_response (366)                           | AREB6.04   | 0.465277778 |   | H | 0 | 0 | 0 | 0 | general GO |
| G_protein_coupled_receptor_protein_signaling_   | MEL1_02    | 0.464795009 |   | H | H | 0 | 0 | 0 | general GO |
| defense_response (100)                          | TAACC.01   | 0.462375675 | 0 | H | M | 0 | 0 | 0 | general GO |
| immune_response (366)                           | STAT6.01   | 0.461111111 | H | H |   | H | 0 | 0 | general GO |
| signal_transduction (1189)                      | MIT.01     | 0.46076555  |   | M | 0 | 0 | 0 | 0 | general GO |
| inflammatory_response (163)                     | MIT.01     | 0.46076555  |   |   |   | H | H | H | general GO |
| immune_response (366)                           | MIT.01     | 0.46076555  |   |   |   |   | M | H | general GO |
| sensory_perception (201)                        | MEL1_03    | 0.46        | H | H | H | 0 | 0 | M | general GO |

|                                                 |           |             |   |   |   |   |   |            |
|-------------------------------------------------|-----------|-------------|---|---|---|---|---|------------|
| immune_response (366)                           | MEL1_03   | 0.46        | H | H | H | H | H | general GO |
| cell_cell_signaling (268)                       | MEL1_03   | 0.46        | 0 | H | 0 | 0 | 0 | general GO |
| sensory_perception (201)                        | RP58.01   | 0.457532051 | H | H | M | 0 | 0 | general GO |
| immune_response (366)                           | RP58.01   | 0.457532051 | H | H |   | M | M | general GO |
| inflammatory_response (163)                     | CEBP.02   | 0.457142857 | H | H | H | 0 | 0 | general GO |
| sensory_perception (201)                        | COMP1.01  | 0.454545455 | H |   | H | M |   | general GO |
| inflammatory_response (163)                     | COMP1.01  | 0.454545455 |   |   | H | 0 | 0 | general GO |
| immune_response (366)                           | COMP1.01  | 0.454545455 | H | H | 0 | 0 |   | general GO |
| chemotaxis (98)                                 | COMP1.01  | 0.454545455 | H | 0 | 0 | 0 | 0 | general GO |
| immune_response (366)                           | PXRCAR.01 | 0.452173913 |   |   | M | H | 0 | general GO |
| inflammatory_response (163)                     | DBP.01    | 0.450909091 |   | H | H | H | 0 | general GO |
| cell_proliferation (243)                        | DBP.01    | 0.450909091 | 0 |   | 0 | 0 | 0 | general GO |
| inflammatory_response (163)                     | BARBIE.01 | 0.449122807 | H | H |   | 0 | 0 | general GO |
| immune_response (366)                           | BARBIE.01 | 0.449122807 |   |   | H | 0 | 0 | general GO |
| immune_response (366)                           | BRACH.01  | 0.448863636 | M | H | 0 | 0 | 0 | general GO |
| G_protein_coupled_receptor_protein_signaling_   | BRACH.01  | 0.448863636 |   | H | H | H | 0 | general GO |
| spermatogenesis (97)                            | VMYB.03   | 0.446686196 | M | H | 0 | 0 | 0 | general GO |
| inflammatory_response (163)                     | PAX8.01   | 0.446153846 |   | H | H | 0 | 0 | general GO |
| immune_response (366)                           | PAX8.01   | 0.446153846 |   | M | M | 0 | 0 | general GO |
| transport (940)                                 | GATA1.01  | 0.446146245 | 0 | M | M | M |   | general GO |
| proteolysis (297)                               | GATA1.01  | 0.446146245 | H | H | H | 0 | 0 | general GO |
| inflammatory_response (163)                     | GATA1.01  | 0.446146245 | M | M |   | 0 | M | general GO |
| cell_surface_receptor_linked_signal_transductio | GATA1.01  | 0.446146245 |   | 0 | 0 | 0 | 0 | general GO |
| inflammatory_response (163)                     | MYT1L.01  | 0.444444444 |   |   | 0 | H | 0 | general GO |
| immune_response (366)                           | MYT1L.01  | 0.444444444 |   | H | H | H | 0 | general GO |
| immune_response (366)                           | STAT.01   | 0.444444444 |   |   | H | 0 | 0 | general GO |
| ubiquitin_cycle (154)                           | VMYB.05   | 0.444012751 | H | H |   | H | H | general GO |
| innate immune_response (46)                     | PRE.01    | 0.442831216 |   |   | H | H | 0 | general GO |
| inflammatory_response (163)                     | PRE.01    | 0.442831216 |   | H | H | H | H | general GO |
| immune_response (366)                           | PRE.01    | 0.442831216 |   | H | 0 | 0 | 0 | general GO |
| immune_response (366)                           | TCF11.01  | 0.440816327 |   |   |   | M | 0 | general GO |
| G_protein_coupled_receptor_protein_signaling_   | TCF11.01  | 0.440816327 | H |   |   | 0 | 0 | general GO |
| sensory_perception (201)                        | BCL6.02   | 0.436298077 | H | 0 | M | M | M | general GO |
| inflammatory_response (163)                     | BCL6.02   | 0.436298077 |   |   |   | M | 0 | general GO |
| immune_response (366)                           | BCL6.02   | 0.436298077 |   |   |   | M | 0 | general GO |
| chemotaxis (98)                                 | BCL6.02   | 0.436298077 |   | M | M | M | M | general GO |
| cell_cell_signaling (268)                       | BCL6.02   | 0.436298077 | 0 | 0 | 0 |   | 0 | general GO |
| calcium_ion_homeostasis (30)                    | BCL6.02   | 0.436298077 | H | H |   |   | H | general GO |
| proteolysis (297)                               | TCF11MAFG | 0.434095861 |   |   | M | 0 | 0 | general GO |
| inflammatory_response (163)                     | TCF11MAFG | 0.434095861 |   | H | H | 0 | 0 | general GO |
| immune_response (366)                           | TCF11MAFG | 0.434095861 |   |   | H | H | 0 | general GO |
| chemotaxis (98)                                 | TCF11MAFG | 0.434095861 |   | H | H | H | 0 | general GO |
| immune_response (366)                           | HOX1-3.01 | 0.433673469 |   | H | M | 0 | M | general GO |
| innate immune_response (46)                     | TST1.01   | 0.433333333 |   |   | M | 0 | 0 | general GO |
| antimicrobial_humoral_response (87)             | TST1.01   | 0.433333333 | H | 0 | 0 | 0 | 0 | general GO |
| immune_response (366)                           | ILF1_01   | 0.433333333 |   |   |   | H | 0 | general GO |
| signal_transduction (1189)                      | AP1.01    | 0.432748538 |   | M | 0 | 0 | 0 | general GO |
| innate immune_response (46)                     | AP1.01    | 0.432748538 | 0 | 0 |   | H | 0 | general GO |
| inflammatory_response (163)                     | AP1.01    | 0.432748538 |   |   | H | 0 | 0 | general GO |
| immune_response (366)                           | AP1.01    | 0.432748538 |   |   |   | H | H | general GO |
| epidermis_development (59)                      | AP1.01    | 0.432748538 | H | 0 | M | M | M | general GO |
| elevation_of_cytosolic_calcium_ion_concentratio | AP1.01    | 0.432748538 | M | H | H | 0 | 0 | general GO |
| chemotaxis (98)                                 | AP1.01    | 0.432748538 |   |   | H | H | 0 | general GO |
| cell_surface_receptor_linked_signal_transductio | AP1.01    | 0.432748538 | H |   | 0 | 0 | 0 | general GO |
| innate immune_response (46)                     | ISL1.01   | 0.430586081 | H | M | 0 | 0 | M | general GO |
| inflammatory_response (163)                     | ISL1.01   | 0.430586081 |   |   | H | H | H | general GO |
| response_to_virus (55)                          | ISRE.01   | 0.42745098  |   |   |   |   | H | general GO |
| immune_response (366)                           | ISRE.01   | 0.42745098  |   |   |   | 0 | 0 | general GO |
| cell_cell_signaling (268)                       | ISRE.01   | 0.42745098  |   |   | H | 0 | 0 | general GO |
| antimicrobial_humoral_response (87)             | ISRE.01   | 0.42745098  |   | H | H | H | H | general GO |
| ubiquitin_dependent_protein_catabolism (72)     | IRF2.01   | 0.427185044 |   |   | H | H | 0 | general GO |
| response_to_virus (55)                          | IRF2.01   | 0.427185044 |   |   |   |   | H | general GO |
| inflammatory_response (163)                     | IRF2.01   | 0.427185044 |   | M | M | 0 | 0 | general GO |
| immune_response (366)                           | IRF2.01   | 0.427185044 |   |   |   | M | 0 | general GO |

|                                                  |            |             |   |   |   |   |   |            |
|--------------------------------------------------|------------|-------------|---|---|---|---|---|------------|
| cell_surface_receptor_linked_signal_transductio  | IRF2.01    | 0.427185044 |   |   | H | H | 0 | general GO |
| homophilic_cell_adhesion (70)                    | PDX1_G_SA  | 0.426470588 | 0 | 0 | 0 | M | H | general GO |
| ubiquitin_dependent_protein_catabolism (72)      | IRF3.01    | 0.416666667 |   |   | M | 0 | 0 | general GO |
| response_to_virus (55)                           | IRF3.01    | 0.416666667 |   |   |   | 0 | 0 | general GO |
| positive_regulation_of_I_kappaB_kinase_NF_kappaB | IRF3.01    | 0.416666667 |   | 0 | 0 | 0 | 0 | general GO |
| innate_immune_response (46)                      | IRF3.01    | 0.416666667 | M | 0 | 0 | H | 0 | general GO |
| inflammatory_response (163)                      | IRF3.01    | 0.416666667 | H | H |   | H | H | general GO |
| immune_response (366)                            | IRF3.01    | 0.416666667 |   |   |   |   | 0 | general GO |
| sensory_perception (201)                         | SRF.01     | 0.416534181 |   |   |   | H | H | general GO |
| muscle_development (107)                         | SRF.01     | 0.416534181 |   |   |   | M | 0 | general GO |
| inflammatory_response (163)                      | SRF.01     | 0.416534181 |   |   |   |   | 0 | general GO |
| immune_response (366)                            | SRF.01     | 0.416534181 |   |   |   |   | M | general GO |
| circulation (52)                                 | SRF.01     | 0.416534181 | 0 | 0 | H | 0 | 0 | general GO |
| chemotaxis (98)                                  | SRF.01     | 0.416534181 | H |   |   |   | 0 | general GO |
| response_to_virus (55)                           | PRDM1.01   | 0.412696678 |   |   |   |   | H | general GO |
| innate_immune_response (46)                      | PRDM1.01   | 0.412696678 | M | 0 | H | H | H | general GO |
| inflammatory_response (163)                      | PRDM1.01   | 0.412696678 |   |   |   | H | 0 | general GO |
| immune_response (366)                            | PRDM1.01   | 0.412696678 |   |   |   | H | 0 | general GO |
| defense_response (100)                           | PRDM1.01   | 0.412696678 | 0 | H | 0 | H | 0 | general GO |
| innate_immune_response (46)                      | HMG1Y.01   | 0.412049489 |   | 0 | 0 | 0 | 0 | general GO |
| inflammatory_response (163)                      | HMG1Y.01   | 0.412049489 |   |   |   |   | M | general GO |
| immune_response (366)                            | HMG1Y.01   | 0.412049489 |   |   |   | H | H | general GO |
| immune_response (366)                            | FAST1.01   | 0.411564626 |   | 0 | 0 | 0 | 0 | general GO |
| inflammatory_response (163)                      | GATA.01    | 0.411111111 |   | H | H | 0 | M | general GO |
| immune_response (366)                            | GATA.01    | 0.411111111 | H | H | H | H | H | general GO |
| circulation (52)                                 | GATA.01    | 0.411111111 | H |   |   | 0 | 0 | general GO |
| signal_transduction (1189)                       | PBX1_MEIS1 | 0.410675303 | 0 | 0 | M | M | H | general GO |
| sensory_perception (201)                         | HBP1_01    | 0.410364146 |   |   |   | H | H | general GO |
| response_to_virus (55)                           | HBP1_01    | 0.410364146 |   | H | H | 0 | 0 | general GO |
| inflammatory_response (163)                      | HBP1_01    | 0.410364146 |   | H | H | H | 0 | general GO |
| immune_response (366)                            | HBP1_01    | 0.410364146 |   |   | H | H | 0 | general GO |
| cell_surface_receptor_linked_signal_transductio  | HBP1_01    | 0.410364146 |   |   | M | M | 0 | general GO |
| sensory_perception (201)                         | GF11.01    | 0.408015514 |   | H | H | H | H | general GO |
| immune_response (366)                            | GF11.01    | 0.408015514 | H | 0 | H | H | M | general GO |
| immune_response (366)                            | PHOX2_01   | 0.407575758 |   | H | H | 0 | H | general GO |
| immune_response (366)                            | PSE_02     | 0.407407407 |   |   | H | H | H | general GO |
| chemotaxis (98)                                  | PSE_02     | 0.407407407 | H | H |   |   | 0 | general GO |
| mitosis (86)                                     | CHR.01     | 0.405555556 |   |   | M | 0 | 0 | general GO |
| cell_division (103)                              | CHR.01     | 0.405555556 |   |   | M | 0 | 0 | general GO |
| inflammatory_response (163)                      | BRN4.01    | 0.404761905 | 0 | H | H | 0 | 0 | general GO |
| immune_response (366)                            | BRN4.01    | 0.404761905 | H | H | H | H | H | general GO |
| sensory_perception (201)                         | MTBF.01    | 0.404040404 | H | H | 0 | 0 | 0 | general GO |
| inflammatory_response (163)                      | LEF1.02    | 0.404040404 | H | M | H | H | H | general GO |
| inflammatory_response (163)                      | MTBF.01    | 0.404040404 | H | H | H | 0 | H | general GO |
| immune_response (366)                            | MTBF.01    | 0.404040404 | H | H | H | 0 | 0 | general GO |
| chemotaxis (98)                                  | MTBF.01    | 0.404040404 | H | H | H | H | H | general GO |
| cell_cell_signaling (268)                        | MTBF.01    | 0.404040404 |   |   | H | 0 | 0 | general GO |
| response_to_virus (55)                           | IRF1.01    | 0.403617536 |   |   |   |   | H | general GO |
| regulation_of_apoptosis (59)                     | IRF1.01    | 0.403617536 | M | 0 | M | 0 | H | general GO |
| inflammatory_response (163)                      | IRF1.01    | 0.403617536 |   |   |   | 0 | 0 | general GO |
| immune_response (366)                            | IRF1.01    | 0.403617536 |   |   |   | M | 0 | general GO |
| cell_surface_receptor_linked_signal_transductio  | IRF1.01    | 0.403617536 | M | H | H | H | H | general GO |
| response_to_virus (55)                           | CEBPB.01   | 0.4         |   | 0 | 0 | 0 | 0 | general GO |
| proteolysis (297)                                | CEBPB.01   | 0.4         |   |   |   |   | 0 | general GO |
| innate_immune_response (46)                      | CEBPB.01   | 0.4         |   | H | H | H | H | general GO |
| inflammatory_response (163)                      | CEBPB.01   | 0.4         |   | H | H | H | H | general GO |
| inflammatory_response (163)                      | GATA1.04   | 0.4         | H | 0 | 0 | 0 | 0 | general GO |
| immune_response (366)                            | CEBPB.01   | 0.4         | H | H | H | H | H | general GO |
| immune_response (366)                            | GATA1.04   | 0.4         | H | H | H | H | 0 | general GO |
| defense_response (100)                           | GATA1.04   | 0.4         | H | H |   | H | 0 | general GO |
| cell_surface_receptor_linked_signal_transductio  | CEBPB.01   | 0.4         |   | H | H | H | 0 | general GO |
| blood_coagulation (70)                           | CEBPB.01   | 0.4         | M |   |   | 0 | 0 | general GO |
| antimicrobial_humoral_response (87)              | CEBPB.01   | 0.4         | H | H | H | M | 0 | general GO |
| inflammatory_response (163)                      | MEIS1B_HO  | 0.394957983 | M |   |   | H | 0 | general GO |

|                                                 |           |             |   |   |   |   |   |            |
|-------------------------------------------------|-----------|-------------|---|---|---|---|---|------------|
| immune_response (366)                           | OCT1.05   | 0.392857143 |   |   |   | H | 0 | general GO |
| signal_transduction (1189)                      | AARE.01   | 0.391812865 |   | 0 | 0 | 0 | 0 | general GO |
| sensory_perception (201)                        | AARE.01   | 0.391812865 | H | H |   |   | 0 | general GO |
| inflammatory_response (163)                     | AARE.01   | 0.391812865 |   | H | H | 0 | 0 | general GO |
| immune_response (366)                           | AARE.01   | 0.391812865 |   | H | H | H | 0 | general GO |
| inflammatory_response (163)                     | AIRE.01   | 0.391419855 |   | H | H | H | H | general GO |
| immune_response (366)                           | AIRE.01   | 0.391419855 |   |   |   | H | H | general GO |
| sensory_perception (201)                        | LTATA_01  | 0.39        |   | 0 | H | H | 0 | general GO |
| RNA_processing (58)                             | LTATA_01  | 0.39        | M | M | M | 0 | 0 | general GO |
| proteolysis (297)                               | LTATA_01  | 0.39        |   | H | 0 | 0 | 0 | general GO |
| nucleosome_assembly (71)                        | LTATA_01  | 0.39        | H |   |   | H | H | general GO |
| inflammatory_response (163)                     | LTATA_01  | 0.39        |   |   |   | 0 | 0 | general GO |
| cell_cell_signaling (268)                       | LTATA_01  | 0.39        |   | 0 | 0 | 0 | 0 | general GO |
| inflammatory_response (163)                     | BRN2.01   | 0.389384921 |   |   |   | H | 0 | general GO |
| antimicrobial_humoral_response (87)             | BRN2.01   | 0.389384921 | H | H |   | H | 0 | general GO |
| proteolysis (297)                               | IRF4.01   | 0.388961039 |   | 0 | 0 | 0 | 0 | general GO |
| innate_immune_response (46)                     | IRF4.01   | 0.388961039 |   | H | H | H | 0 | general GO |
| inflammatory_response (163)                     | IRF4.01   | 0.388961039 |   | H | H | H | H | general GO |
| immune_response (366)                           | IRF4.01   | 0.388961039 |   |   |   | M | 0 | general GO |
| inflammatory_response (163)                     | STAT5.01  | 0.388571429 |   | H | 0 | H | H | general GO |
| immune_response (366)                           | STAT5.01  | 0.388571429 |   |   |   |   | M | general GO |
| cell_surface_receptor_linked_signal_transductio | STAT5.01  | 0.388571429 | H | H | H | M | 0 | general GO |
| inflammatory_response (163)                     | GATA1.03  | 0.387685485 |   | H | H | H | H | general GO |
| immune_response (366)                           | GATA1.03  | 0.387685485 |   | H | H | H | H | general GO |
| chemotaxis (98)                                 | GATA1.03  | 0.387685485 |   | H | H | H | H | general GO |
| inflammatory_response (163)                     | BCL6.01   | 0.385599694 |   |   |   | H | M | general GO |
| immune_response (366)                           | BCL6.01   | 0.385599694 |   |   |   |   | 0 | general GO |
| chemotaxis (98)                                 | BCL6.01   | 0.385599694 |   | 0 | 0 |   | H | general GO |
| inflammatory_response (163)                     | OCT1.04   | 0.383116883 |   |   |   | H | H | general GO |
| immune_response (366)                           | OCT1.04   | 0.383116883 |   |   |   | H | H | general GO |
| sensory_perception (201)                        | GFI1B.01  | 0.382387888 |   |   | H | 0 | H | general GO |
| immune_response (366)                           | GFI1B.01  | 0.382387888 |   | H | H | 0 | 0 | general GO |
| inflammatory_response (163)                     | PDX1_G_SA | 0.380252101 | 0 | M | M | H | 0 | general GO |
| sensory_perception (201)                        | AMEF2.01  | 0.379545455 | H |   | H | H |   | general GO |
| inflammatory_response (163)                     | AMEF2.01  | 0.379545455 | H |   |   | H | 0 | general GO |
| immune_response (366)                           | AMEF2.01  | 0.379545455 |   | M |   | M | 0 | general GO |
| inflammatory_response (163)                     | NFAT.01   | 0.378787879 |   |   |   | H | H | general GO |
| immune_response (366)                           | NFAT.01   | 0.378787879 |   |   |   | H | 0 | general GO |
| homophilic_cell_adhesion (70)                   | NFAT.01   | 0.378787879 |   | H | 0 | H | H | general GO |
| cell_adhesion (378)                             | NFAT.01   | 0.378787879 | M |   |   | H | 0 | general GO |
| inflammatory_response (163)                     | FREAC4.01 | 0.377604167 |   |   |   | 0 | 0 | general GO |
| immune_response (366)                           | FREAC4.01 | 0.377604167 |   | M | 0 | 0 | 0 | general GO |
| sensory_perception (201)                        | CDX2.01   | 0.375438596 | H | H | H |   | H | general GO |
| innate_immune_response (46)                     | CDX2.01   | 0.375438596 | M |   | H |   | H | general GO |
| inflammatory_response (163)                     | CDX2.01   | 0.375438596 |   |   | H |   | H | general GO |
| immune_response (366)                           | CDX2.01   | 0.375438596 |   | H | H | H | H | general GO |
| antimicrobial_humoral_response (87)             | CDX2.01   | 0.375438596 | H | H | M | 0 | 0 | general GO |
| innate_immune_response (46)                     | MEF2.01   | 0.375       |   | H | H | H | H | general GO |
| inflammatory_response (163)                     | MEF2.01   | 0.375       | H |   | H | H | 0 | general GO |
| immune_response (366)                           | MEF2.01   | 0.375       |   | H | H | 0 | 0 | general GO |
| sensory_perception (201)                        | MMEF2.01  | 0.373626374 | H | H | H |   |   | general GO |
| proteolysis (297)                               | MMEF2.01  | 0.373626374 |   | H | H | 0 | 0 | general GO |
| inflammatory_response (163)                     | MMEF2.01  | 0.373626374 |   | H | H | H | 0 | general GO |
| immune_response (366)                           | MMEF2.01  | 0.373626374 |   |   |   | M | 0 | general GO |
| inflammatory_response (163)                     | SOX9.01   | 0.370192308 | 0 | H |   | H | H | general GO |
| signal_transduction (1189)                      | GATA2.02  | 0.363636364 |   | 0 | H | H | 0 | general GO |
| sensory_perception (201)                        | GATA2.02  | 0.363636364 |   |   |   | H | H | general GO |
| inflammatory_response (163)                     | GATA2.02  | 0.363636364 |   | H | H | 0 | 0 | general GO |
| immune_response (366)                           | GATA2.02  | 0.363636364 |   |   |   |   | H | general GO |
| G_protein_coupled_receptor_protein_signaling_   | GATA2.02  | 0.363636364 |   |   |   | H | H | general GO |
| chemotaxis (98)                                 | GATA2.02  | 0.363636364 |   | H | H | H | H | general GO |
| response_to_virus (55)                          | GATA1.05  | 0.363157895 | H | H | 0 | 0 |   | general GO |
| innate_immune_response (46)                     | GATA1.05  | 0.363157895 | H |   |   | H | H | general GO |
| inflammatory_response (163)                     | GATA1.05  | 0.363157895 | H | M | H | 0 | 0 | general GO |

|                                                 |            |             |  |   |   |   |   |   |            |
|-------------------------------------------------|------------|-------------|--|---|---|---|---|---|------------|
| immune_response (366)                           | GATA1.05   | 0.363157895 |  |   | H | H | H | H | general GO |
| response_to_virus (55)                          | IRF7.01    | 0.356770833 |  |   | H | 0 | 0 | 0 | general GO |
| inflammatory_response (163)                     | IRF7.01    | 0.356770833 |  | H | H | H | 0 | 0 | general GO |
| immune_response (366)                           | IRF7.01    | 0.356770833 |  |   |   |   | 0 | 0 | general GO |
| inflammatory_response (163)                     | OCT1P.01   | 0.356759907 |  |   | H | H | H | H | general GO |
| immune_response (366)                           | OCT1P.01   | 0.356759907 |  | H |   |   | 0 | 0 | general GO |
| antimicrobial_humoral_response (87)             | OCT1P.01   | 0.356759907 |  | H | H | H | H | 0 | general GO |
| sensory_perception (201)                        | OCT.01     | 0.354700855 |  | H | H |   | H | 0 | general GO |
| inflammatory_response (163)                     | OCT.01     | 0.354700855 |  |   | H | H | 0 | 0 | general GO |
| immune_response (366)                           | OCT.01     | 0.354700855 |  |   | H | H | M | 0 | general GO |
| visual_perception (142)                         | SIX3.01    | 0.352962963 |  |   | H | H | H | 0 | general GO |
| sensory_perception (201)                        | SIX3.01    | 0.352962963 |  | H | H | H | H | 0 | general GO |
| immune_response (366)                           | PDX1_G_SA  | 0.352941176 |  | H | 0 | 0 | 0 | 0 | general GO |
| signal_transduction (1189)                      | GATA2.01   | 0.351428571 |  | M | 0 | 0 | 0 | 0 | general GO |
| sensory_perception (201)                        | GATA2.01   | 0.351428571 |  |   |   | H | H | H | general GO |
| inflammatory_response (163)                     | GATA2.01   | 0.351428571 |  |   | 0 | 0 | 0 | 0 | general GO |
| immune_response (366)                           | GATA2.01   | 0.351428571 |  |   |   | H |   | H | general GO |
| G_protein_coupled_receptor_protein_signaling    | GATA2.01   | 0.351428571 |  |   |   | H | H | H | general GO |
| chemotaxis (98)                                 | GATA2.01   | 0.351428571 |  | H |   |   | 0 | 0 | general GO |
| cell_surface_receptor_linked_signal_transductio | GATA2.01   | 0.351428571 |  | H | M | 0 | 0 | 0 | general GO |
| inflammatory_response (163)                     | CDX1.01    | 0.349621212 |  |   |   |   | 0 | 0 | general GO |
| immune_response (366)                           | CDX1.01    | 0.349621212 |  |   | H | H | H | 0 | general GO |
| antimicrobial_humoral_response (87)             | CDX1.01    | 0.349621212 |  | M |   | H | H | H | general GO |
| sensory_perception (201)                        | NKX25.02   | 0.347222222 |  |   | H | H | H | H | general GO |
| antimicrobial_humoral_response (87)             | NKX25.02   | 0.347222222 |  | H | H | H | 0 | M | general GO |
| sensory_perception (201)                        | FREAC2.01  | 0.346774194 |  | H |   |   |   | H | general GO |
| inflammatory_response (163)                     | DLX3.01    | 0.34375     |  |   |   |   | 0 | 0 | general GO |
| immune_response (366)                           | DLX3.01    | 0.34375     |  |   |   |   | 0 | 0 | general GO |
| antimicrobial_humoral_response (87)             | DLX3.01    | 0.34375     |  |   | H | H | 0 | H | general GO |
| proteolysis (297)                               | HOXC13_01  | 0.343589744 |  | M | 0 | H | H | H | general GO |
| immune_response (366)                           | HOXC13_01  | 0.343589744 |  |   | H | H | H | H | general GO |
| inflammatory_response (163)                     | HNF1.02    | 0.343382353 |  |   |   | H | H | 0 | general GO |
| sensory_perception (201)                        | XFD1.01    | 0.342857143 |  | H |   | H | H | H | general GO |
| inflammatory_response (163)                     | XFD1.01    | 0.342857143 |  |   |   | M | M | 0 | general GO |
| inflammatory_response (163)                     | ATBF1.01   | 0.338562092 |  |   | H | H | 0 | 0 | general GO |
| immune_response (366)                           | ATBF1.01   | 0.338562092 |  |   | H | H | H | H | general GO |
| innate_immune_response (46)                     | HMEF2.01   | 0.3375      |  |   |   | H | H | H | general GO |
| inflammatory_response (163)                     | HMEF2.01   | 0.3375      |  | H |   | H | H | 0 | general GO |
| signal_transduction (1189)                      | GATA3.01   | 0.335555556 |  |   | 0 | H | 0 | 0 | general GO |
| sensory_perception (201)                        | GATA3.01   | 0.335555556 |  |   |   | H |   | H | general GO |
| inflammatory_response (163)                     | GATA3.01   | 0.335555556 |  |   | H | H | H | M | general GO |
| immune_response (366)                           | GATA3.01   | 0.335555556 |  |   |   |   | H | H | general GO |
| G_protein_coupled_receptor_protein_signaling    | GATA3.01   | 0.335555556 |  |   |   | H | H | H | general GO |
| chemotaxis (98)                                 | GATA3.01   | 0.335555556 |  | H |   |   | H | 0 | general GO |
| inflammatory_response (163)                     | EVI1.04    | 0.333333333 |  |   |   |   | M | 0 | general GO |
| sensory_perception (201)                        | EVI1.02    | 0.333333333 |  | H | H |   |   | H | general GO |
| sensory_perception (201)                        | MEIS1_HOXA | 0.333333333 |  | H |   | H | H | H | general GO |
| sensory_perception (201)                        | PBX_HOXA9  | 0.333333333 |  | H |   | H | H | H | general GO |
| inflammatory_response (163)                     | MEIS1_HOXA | 0.333333333 |  | H |   | H | H | H | general GO |
| inflammatory_response (163)                     | PBX_HOXA9  | 0.333333333 |  | H |   | H | H | H | general GO |
| immune_response (366)                           | EVI1.02    | 0.333333333 |  |   | H | H | 0 | 0 | general GO |
| immune_response (366)                           | MEIS1_HOXA | 0.333333333 |  |   |   | H | H | H | general GO |
| immune_response (366)                           | PBX_HOXA9  | 0.333333333 |  |   |   | H | H | H | general GO |
| inflammatory_response (163)                     | BRN3.02    | 0.331934732 |  |   |   |   | H | H | general GO |
| immune_response (366)                           | BRN3.02    | 0.331934732 |  |   |   | H | H | H | general GO |
| sensory_perception (201)                        | FKHRL1.01  | 0.327412587 |  |   |   |   | 0 | H | general GO |
| inflammatory_response (163)                     | BRN2.03    | 0.324242424 |  | H |   |   | 0 | 0 | general GO |
| sensory_perception (201)                        | XFD2.01    | 0.323076923 |  |   |   | H | H | H | general GO |
| inflammatory_response (163)                     | XFD2.01    | 0.323076923 |  |   |   |   | M | 0 | general GO |
| immune_response (366)                           | XFD2.01    | 0.323076923 |  |   | H | H | H | 0 | general GO |
| inflammatory_response (163)                     | OC2.01     | 0.320855615 |  | H |   |   | M | M | general GO |
| immune_response (366)                           | OC2.01     | 0.320855615 |  |   | H | H | H | H | general GO |
| inflammatory_response (163)                     | LMX1B.01   | 0.32        |  |   |   |   |   | H | general GO |
| response_to_virus (55)                          | FREAC3.01  | 0.319230769 |  | H | H |   | H | H | general GO |

|                                     |           |             |   |   |   |   |   |   |            |
|-------------------------------------|-----------|-------------|---|---|---|---|---|---|------------|
| proteolysis (297)                   | FREAC3.01 | 0.319230769 |   | 0 | 0 | 0 | 0 | 0 | general GO |
| inflammatory_response (163)         | FREAC3.01 | 0.319230769 | M | M |   |   | H | 0 | general GO |
| immune_response (366)               | FREAC3.01 | 0.319230769 |   | M | H |   | 0 | H | general GO |
| inflammatory_response (163)         | HOXA9.01  | 0.318627451 |   |   | H | H | H |   | general GO |
| defense_response (100)              | HOXA9.01  | 0.318627451 | 0 | M | 0 | H | H | H | general GO |
| innate_immune_response (46)         | CART1.01  | 0.316599389 | M | M |   |   | H | 0 | general GO |
| inflammatory_response (163)         | CART1.01  | 0.316599389 |   | M | M |   | 0 | 0 | general GO |
| immune_response (366)               | CART1.01  | 0.316599389 |   |   |   |   | 0 | H | general GO |
| innate_immune_response (46)         | EN1.01    | 0.315384615 | H | H |   |   | H | H | general GO |
| antimicrobial_humoral_response (87) | EN1.01    | 0.315384615 |   | H | H |   | 0 | 0 | general GO |
| transport (940)                     | HNF1.03   | 0.313664596 |   |   |   | H | 0 | 0 | general GO |
| sodium_ion_transport (75)           | HNF1.03   | 0.313664596 |   |   |   | H | 0 | 0 | general GO |
| inflammatory_response (163)         | HNF1.03   | 0.313664596 |   | H | H |   | 0 | 0 | general GO |
| blood_coagulation (70)              | HNF1.03   | 0.313664596 |   |   |   |   | 0 | 0 | general GO |
| steroid_metabolism (54)             | PBX1.01   | 0.312770468 |   |   |   |   | M | 0 | general GO |
| nucleosome_assembly (71)            | PBX1.01   | 0.312770468 | H |   |   |   |   | M | general GO |
| inflammatory_response (163)         | PBX1.01   | 0.312770468 |   | H | 0 | H | H | 0 | general GO |
| signal_transduction (1189)          | EVI1.01   | 0.3125      |   | 0 | H |   | 0 | 0 | general GO |
| sensory_perception (201)            | EVI1.01   | 0.3125      | H | H |   |   | H | H | general GO |
| inflammatory_response (163)         | EVI1.01   | 0.3125      |   |   |   | H | 0 | 0 | general GO |
| inflammatory_response (163)         | HNF6.01   | 0.311564626 |   | H | H | H | H | 0 | general GO |
| immune_response (366)               | HNF6.01   | 0.311564626 | H | H |   |   | H | H | general GO |
| innate_immune_response (46)         | SRY.01    | 0.308080808 | H |   |   | H | H | 0 | general GO |
| immune_response (366)               | SRY.01    | 0.308080808 |   |   |   | H | H | 0 | general GO |
| inflammatory_response (163)         | BRN3.01   | 0.301216641 |   |   |   | H |   | H | general GO |
| immune_response (366)               | BRN3.01   | 0.301216641 |   | H | H | H | 0 | 0 | general GO |
| antimicrobial_humoral_response (87) | XVENT2.01 | 0.300287356 |   | H | H | H | H | 0 | general GO |
| inflammatory_response (163)         | ATATA.01  | 0.3         |   | H | H | H | 0 | 0 | general GO |
| immune_response (366)               | ATATA.01  | 0.3         |   | M | M | 0 | 0 | 0 | general GO |
| sensory_perception (201)            | MEF2.02   | 0.298701452 |   | H | H | H | H | H | general GO |
| muscle_development (107)            | MEF2.02   | 0.298701452 |   |   |   |   | H | 0 | general GO |
| inflammatory_response (163)         | MEF2.02   | 0.298701452 |   | H | H | H | H | 0 | general GO |
| immune_response (366)               | MEF2.02   | 0.298701452 | H |   |   | H | H | 0 | general GO |
| sensory_perception (201)            | MEF2.03   | 0.298542774 |   | H | H | H | 0 | H | general GO |
| muscle_development (107)            | MEF2.03   | 0.298542774 |   | H | H | 0 | 0 | 0 | general GO |
| inflammatory_response (163)         | MEF2.03   | 0.298542774 |   |   |   | H | H | H | general GO |
| immune_response (366)               | MEF2.03   | 0.298542774 |   |   |   | H | H | H | general GO |
| transport (940)                     | HNF1.01   | 0.296715928 |   |   |   | H | 0 | 0 | general GO |
| steroid_metabolism (54)             | HNF1.01   | 0.296715928 | 0 | 0 |   |   | 0 |   | general GO |
| inflammatory_response (163)         | DLX1.01   | 0.292929293 |   |   |   | H | 0 | 0 | general GO |
| sensory_perception (201)            | MEF2.05   | 0.292673993 | H | H | H | H | H |   | general GO |
| immune_response (366)               | MEF2.05   | 0.292673993 |   | M | M | M | M | M | general GO |
| inflammatory_response (163)         | RSRFC4.02 | 0.292371595 |   |   |   |   |   | H | general GO |
| immune_response (366)               | RSRFC4.02 | 0.292371595 | H |   |   |   | H | H | general GO |
| sensory_perception (201)            | CDP.02    | 0.290344162 |   |   |   | H | H | H | general GO |
| pregnancy (41)                      | CDP.02    | 0.290344162 | 0 | M |   | 0 | 0 | 0 | general GO |
| inflammatory_response (163)         | CDP.02    | 0.290344162 |   | M | H | H | H | H | general GO |
| immune_response (366)               | CDP.02    | 0.290344162 |   | H | H |   | H | H | general GO |
| immune_response (366)               | MEL1_01   | 0.288515406 |   |   |   |   |   | H | general GO |
| inflammatory_response (163)         | CLOX.01   | 0.287721893 |   | 0 | 0 |   | H | H | general GO |
| immune_response (366)               | CLOX.01   | 0.287721893 | H | H |   |   | H | H | general GO |
| sensory_perception (201)            | GATA3.02  | 0.286666667 |   | H | H |   |   |   | general GO |
| metabolism (241)                    | GATA3.02  | 0.286666667 | 0 | M | 0 |   | H | 0 | general GO |
| inflammatory_response (163)         | GATA3.02  | 0.286666667 |   | H | 0 |   | H | 0 | general GO |
| immune_response (366)               | GATA3.02  | 0.286666667 |   |   |   | H | H | H | general GO |
| chemotaxis (98)                     | GATA3.02  | 0.286666667 | H | 0 | 0 |   |   | 0 | general GO |
| inflammatory_response (163)         | MEF2.04   | 0.286298736 | H | H | H |   |   | 0 | general GO |
| immune_response (366)               | MEF2.04   | 0.286298736 |   | H | H |   | 0 | H | general GO |
| sensory_perception (201)            | EVI1.05   | 0.28620194  | H |   |   | H | H | H | general GO |
| inflammatory_response (163)         | EVI1.05   | 0.28620194  |   | 0 | 0 | 0 | 0 | 0 | general GO |
| immune_response (366)               | EVI1.05   | 0.28620194  |   |   |   | H | H | 0 | general GO |
| sensory_perception (201)            | TATA.01   | 0.284987277 |   |   |   | H | H | 0 | general GO |
| nucleosome_assembly (71)            | TATA.01   | 0.284987277 |   |   |   | H | H | H | general GO |
| inflammatory_response (163)         | TATA.01   | 0.284987277 |   |   |   |   | 0 | 0 | general GO |

|                                             |           |             |   |   |   |   |   |            |
|---------------------------------------------|-----------|-------------|---|---|---|---|---|------------|
| immune_response (366)                       | TATA.01   | 0.284987277 |   |   | 0 | 0 | 0 | general GO |
| epidermis_development (59)                  | TATA.01   | 0.284987277 |   |   | 0 | 0 | 0 | general GO |
| chromosome_organization_and_biogenesis (83) | TATA.01   | 0.284987277 | H |   | H | H | H | general GO |
| chemotaxis (98)                             | TATA.01   | 0.284987277 |   |   | 0 | 0 | 0 | general GO |
| cell_cell_signaling (268)                   | TATA.01   | 0.284987277 |   |   | 0 | 0 | 0 | general GO |
| calcium_ion_homeostasis (30)                | TATA.01   | 0.284987277 |   |   | M | 0 | 0 | general GO |
| antimicrobial_humoral_response (87)         | TATA.01   | 0.284987277 | H | H | 0 | 0 | 0 | general GO |
| sensory_perception (201)                    | RSRFC4.01 | 0.28125     | H | H | H | H | H | general GO |
| muscle_development (107)                    | RSRFC4.01 | 0.28125     |   |   | H | H | 0 | general GO |
| inflammatory_response (163)                 | RSRFC4.01 | 0.28125     |   |   | H | H | H | general GO |
| immune_response (366)                       | RSRFC4.01 | 0.28125     |   |   | H | H | 0 | general GO |
| chemotaxis (98)                             | RSRFC4.01 | 0.28125     | 0 | 0 | 0 | 0 | 0 | general GO |
| inflammatory_response (163)                 | TATA.02   | 0.276190476 |   |   | 0 | 0 | H | general GO |
| immune_response (366)                       | TATA.02   | 0.276190476 |   |   | H | 0 | 0 | general GO |
| chemotaxis (98)                             | TATA.02   | 0.276190476 | H | H | H | H | H | general GO |
| cell_cell_signaling (268)                   | TATA.02   | 0.276190476 |   |   | 0 | 0 | 0 | general GO |
| inflammatory_response (163)                 | MYT1.02   | 0.275624837 | M | 0 | 0 | 0 | 0 | general GO |
| immune_response (366)                       | MYT1.02   | 0.275624837 | H | H | 0 | 0 | 0 | general GO |
| homophilic_cell_adhesion (70)               | MYT1.02   | 0.275624837 | H | H | H | H | H | general GO |
| sensory_perception (201)                    | PIT1.01   | 0.273333333 |   |   | H | 0 | H | general GO |
| innate immune_response (46)                 | PIT1.01   | 0.273333333 | H | 0 |   | H | H | general GO |
| inflammatory_response (163)                 | PIT1.01   | 0.273333333 | H |   |   | H | H | general GO |
| immune_response (366)                       | PIT1.01   | 0.273333333 |   |   |   | H | H | general GO |
| sensory_perception (201)                    | FREAC7.01 | 0.272727273 |   |   |   |   | H | general GO |
| inflammatory_response (163)                 | FREAC7.01 | 0.272727273 |   |   | 0 | M | 0 | general GO |
| immune_response (366)                       | FREAC7.01 | 0.272727273 | H | H |   | 0 | 0 | general GO |
| inflammatory_response (163)                 | SATB1.01  | 0.272321429 |   |   |   | H | H | general GO |
| inflammatory_response (163)                 | HFH1.01   | 0.268518519 |   |   | H | H | 0 | general GO |
| sensory_perception (201)                    | HFH8.01   | 0.266025641 | H | H |   |   | H | general GO |
| proteolysis (297)                           | HFH8.01   | 0.266025641 |   |   | H | H | 0 | general GO |
| inflammatory_response (163)                 | HFH8.01   | 0.266025641 | H | 0 | 0 | 0 | 0 | general GO |
| sensory_perception_of_smell (40)            | MYT1.01   | 0.265925926 | 0 | 0 | 0 | 0 | 0 | general GO |
| inflammatory_response (163)                 | MYT1.01   | 0.265925926 | H | H | H | 0 | 0 | general GO |
| immune_response (366)                       | MYT1.01   | 0.265925926 |   |   | H | H | 0 | general GO |
| sensory_perception (201)                    | OCT1.01   | 0.264074431 | H | H |   |   | H | general GO |
| metabolism (241)                            | OCT1.01   | 0.264074431 | M | 0 | 0 | H | 0 | general GO |
| inflammatory_response (163)                 | OCT1.01   | 0.264074431 |   |   |   |   | M | general GO |
| sensory_perception (201)                    | BRN5.01   | 0.262032086 | H |   | H |   | H | general GO |
| proteolysis (297)                           | BRN5.01   | 0.262032086 | 0 | 0 | 0 | 0 | 0 | general GO |
| immune_response (366)                       | BRN5.01   | 0.262032086 |   |   |   | 0 | 0 | general GO |
| inflammatory_response (163)                 | HNF3B.01  | 0.255731922 | M | 0 | H | 0 | 0 | general GO |
| immune_response (366)                       | HNF3B.01  | 0.255731922 |   |   | M | M | 0 | general GO |
| digestion (51)                              | HNF3B.01  | 0.255731922 |   |   | M | 0 | 0 | general GO |
| innate immune_response (46)                 | HFH2.01   | 0.25        | H | M | 0 | 0 | 0 | general GO |
| inflammatory_response (163)                 | HFH2.01   | 0.25        |   |   | H | M | 0 | general GO |
| immune_response (366)                       | HFH2.01   | 0.25        |   |   |   | H | 0 | general GO |
| immune_response (366)                       | NKX31.01  | 0.247412008 | H | H | 0 | 0 | 0 | general GO |
| inflammatory_response (163)                 | BRN2.02   | 0.246031746 |   |   |   |   | 0 | general GO |
| immune_response (366)                       | EVI1.03   | 0.24340176  |   |   | H | H | H | general GO |
| innate immune_response (46)                 | BRIGHT.01 | 0.217287014 | 0 | M | H | 0 | 0 | general GO |
| inflammatory_response (163)                 | BRIGHT.01 | 0.217287014 | H |   |   |   | H | general GO |
| sensory_perception (201)                    | OCT1.06   | 0.216820628 | H | H |   | H | 0 | general GO |
| innate immune_response (46)                 | OCT1.06   | 0.216820628 | M |   | M | M | 0 | general GO |
| inflammatory_response (163)                 | OCT1.06   | 0.216820628 |   |   |   | H | H | general GO |
| immune_response (366)                       | OCT1.06   | 0.216820628 |   |   | H | H | H | general GO |
| inflammatory_response (163)                 | LHX3.01   | 0.138047138 | H | H | H | H | H | general GO |



# 100bp Window with overlap 50bp

| GO group                             | Motifs       | motif GC | -199 - -100 | -149 - -50 | -99 - 0 | -49 - 50 | 1 - 100 | 51 - 150 | 101 - 200 | 151 - 250 | 201 - 300 | 251 - 350 | 301 - 400 | 351 - 450 | 401 - 500 | 451 - 550 | 501 - 600 | 551 - 650 | 601 - 700 | 651 - 750 | 701 - 800 | 751 - 850 | 801 - 900 | 851 - 950 | 901 - 1000 | GO-classes       |
|--------------------------------------|--------------|----------|-------------|------------|---------|----------|---------|----------|-----------|-----------|-----------|-----------|-----------|-----------|-----------|-----------|-----------|-----------|-----------|-----------|-----------|-----------|-----------|-----------|------------|------------------|
| transcription (930)                  | GC_rich      | 1        | H           | H          | 0       | 0        | 0       | M        |           |           |           | M         |           |           |           |           | M         | H         |           |           |           |           |           |           |            | transcription GO |
| transcription (930)                  | poly_C       | 1        | H           | H          | M       | 0        | 0       | 0        | H         |           |           | H         |           |           | M         | M         | M         | 0         | M         |           |           | H         | M         | 0         | H          | transcription GO |
| transcription (930)                  | SP1.01       | 0.8      | 0           | 0          | 0       | 0        | 0       | 0        | 0         |           |           | M         | M         |           | M         | M         | 0         | 0         | M         | M         |           | M         | 0         |           | 0          | transcription GO |
| transcription (930)                  | WT1.01       | 0.8      | H           | H          | 0       | 0        | 0       | H        | M         | M         | M         |           |           |           |           |           | M         | 0         | 0         | H         | H         | 0         | M         |           |            | transcription GO |
| transcription (930)                  | MAZR.01      | 0.8      | 0           | 0          |         | 0        | 0       | 0        | 0         |           |           | M         | M         |           |           |           | M         | M         | 0         | 0         | 0         | 0         | M         | H         | 0          | transcription GO |
| transcription (930)                  | ZNF202.01    | 0.7      | H           | H          | 0       | 0        | 0       | 0        | H         |           |           | M         | 0         |           | M         | M         | 0         | 0         | 0         |           | 0         | 0         | 0         | 0         | 0          | transcription GO |
| transcription (930)                  | AP2.01       | 0.7      | 0           | 0          | 0       | 0        | 0       | H        | 0         | H         |           | M         | M         | 0         |           | M         | 0         | 0         | H         | H         | H         | H         |           |           |            | transcription GO |
| transcription (930)                  | ZF5.01       | 0.7      | 0           | 0          | 0       | 0        | 0       | 0        | 0         | 0         |           | M         | M         | M         |           | H         | 0         | 0         | 0         | H         | 0         | 0         | H         | H         | H          | transcription GO |
| transcription (930)                  | NRF1_01      | 0.7      | 0           | 0          | 0       | 0        | 0       | 0        | 0         | 0         |           |           |           | M         | M         | M         | 0         | 0         | 0         | H         | H         | H         | H         | H         |            | transcription GO |
| transcription (930)                  | ZBP89.01     | 0.7      | H           | H          | M       | 0        | M       | M        | 0         |           | M         | 0         | M         | M         | H         | M         | M         | M         | 0         | 0         | 0         | 0         | 0         | 0         | 0          | transcription GO |
| transcription (930)                  | CKROX_01     | 0.7      | H           |            | M       | 0        | M       | H        | 0         | 0         | H         |           | M         |           | H         | M         | M         | 0         | 0         | 0         | 0         | 0         | 0         | 0         | 0          | transcription GO |
| transcription (930)                  | EGR1.02      | 0.7      | H           | H          | M       | 0        | M       | H        | H         |           | M         |           | H         | H         |           |           | M         | M         | 0         |           | H         | 0         | H         |           | H          | transcription GO |
| transcription (930)                  | GC.01        | 0.7      | 0           | 0          | 0       | 0        | 0       | 0        | 0         | 0         | H         | M         | 0         | 0         |           | M         | M         | 0         | 0         | 0         | 0         | 0         | M         | 0         | 0          | transcription GO |
| transcription (930)                  | MAZ.01       | 0.7      | 0           | 0          | 0       | 0        | 0       | 0        | 0         | H         |           | M         | 0         | M         | M         | M         | M         | 0         | 0         | 0         | 0         | H         | H         | 0         | 0          | transcription GO |
| transcription (930)                  | PLAG1_01     | 0.6      | 0           | 0          | 0       | 0        | 0       | 0        | H         |           | 0         | 0         | 0         | M         | M         | M         | M         | 0         | 0         | 0         | H         | H         | H         | H         | 0          | transcription GO |
| regulation_of_transcription_DNA_depe | GC_rich      | 1        | H           |            | 0       | 0        | 0       | M        |           |           |           |           |           |           |           |           |           | H         |           |           | H         |           |           |           |            | transcription GO |
| regulation_of_transcription_DNA_depe | poly_C       | 1        | H           | H          | M       | M        | 0       |          |           |           |           | 0         |           |           |           |           | M         | M         | 0         |           |           |           | M         | M         | H          | transcription GO |
| regulation_of_transcription_DNA_depe | SP1.01       | 0.8      | 0           | H          | 0       | 0        | 0       | 0        | 0         |           |           |           |           |           | M         | M         | M         | 0         | M         | M         |           |           |           |           |            | transcription GO |
| regulation_of_transcription_DNA_depe | WT1.01       | 0.8      |             |            |         | 0        | 0       | 0        |           | M         | M         |           |           |           |           |           | M         | 0         | 0         | H         |           | M         |           |           |            | transcription GO |
| regulation_of_transcription_DNA_depe | MAZR.01      | 0.8      | H           | 0          | H       | M        | 0       | M        | 0         |           |           | M         |           |           |           |           | M         | M         | M         | 0         | 0         | M         | M         | 0         |            | transcription GO |
| regulation_of_transcription_DNA_depe | ZNF202.01    | 0.7      | H           | H          | 0       | 0        | 0       | 0        | H         |           |           | M         | 0         |           | M         | M         | M         | 0         | H         |           | M         | M         | M         | 0         |            | transcription GO |
| regulation_of_transcription_DNA_depe | AP2.01       | 0.7      | 0           | 0          | 0       | 0        | 0       | H        | M         |           |           | M         | M         | H         |           | M         | H         | H         | H         | H         | H         | H         |           |           |            | transcription GO |
| regulation_of_transcription_DNA_depe | ZF5.01       | 0.7      | 0           | 0          | 0       | 0        | 0       | 0        | H         | M         |           | M         |           | M         | M         |           | H         | H         | H         | H         | H         | 0         | H         | H         |            | transcription GO |
| regulation_of_transcription_DNA_depe | ZF9.01       | 0.7      | 0           | 0          | 0       | 0        | 0       | 0        | 0         | H         | H         |           | M         | 0         | H         | H         | H         | H         | M         | M         | M         |           |           | 0         |            | transcription GO |
| regulation_of_transcription_DNA_depe | NRF1_01      | 0.7      | 0           | 0          | 0       | 0        | 0       | 0        | M         | 0         | M         |           |           | M         | 0         | 0         | H         | H         | H         | H         | H         | H         | H         | H         |            | transcription GO |
| regulation_of_transcription_DNA_depe | ZBP89.01     | 0.7      | H           | H          | M       | 0        | M       | M        | M         |           |           |           |           | H         |           |           | M         | M         | 0         | 0         | H         | 0         | 0         | 0         | 0          | transcription GO |
| regulation_of_transcription_DNA_depe | CKROX_01     | 0.7      | H           |            |         | 0        | M       | M        |           | 0         |           |           |           |           |           |           | M         | 0         | 0         |           | H         | 0         | M         | 0         | 0          | transcription GO |
| regulation_of_transcription_DNA_depe | EGR1.02      | 0.7      | 0           |            | M       | 0        | 0       | 0        |           |           |           |           |           | H         |           |           | M         | M         | M         |           | H         | 0         |           |           |            | transcription GO |
| regulation_of_transcription_DNA_depe | EGR1.01      | 0.7      | 0           | 0          | 0       | 0        | 0       | 0        | 0         | 0         |           | M         | 0         | 0         | H         | 0         | M         | M         | 0         | 0         | 0         | 0         | 0         | 0         | 0          | transcription GO |
| regulation_of_transcription_DNA_depe | MAZ.01       | 0.7      | 0           | 0          | 0       | 0        | 0       | 0        | 0         | H         |           | M         | M         | M         |           |           | M         | M         | M         | 0         | 0         | H         |           | 0         | 0          | transcription GO |
| regulation_of_transcription_DNA_depe | PLAG1_01     | 0.6      | 0           | M          | M       | 0        | 0       | 0        | H         | 0         | 0         | M         | M         | M         |           |           | M         | M         | 0         | 0         | M         | H         | H         | H         | 0          | transcription GO |
| regulation_of_transcription_DNA_depe | HES1.01      | 0.6      | 0           | 0          | 0       | 0        | 0       | M        | M         | 0         | 0         | 0         | 0         | 0         | M         | 0         | 0         | 0         | 0         | H         | H         | 0         |           | H         | 0          | transcription GO |
| regulation_of_transcription_DNA_depe | MUSCLE_INI.0 | 0.6      | 0           | 0          | 0       | 0        | 0       | 0        | 0         | 0         |           | 0         | 0         | M         | 0         | 0         | H         | H         | 0         | 0         | 0         | 0         | M         | 0         | 0          | transcription GO |
| regulation_of_transcription_DNA_depe | MUSCLE_INI.0 | 0.6      | 0           | 0          | 0       | 0        | 0       | 0        | 0         | 0         | 0         | 0         | M         |           | 0         | 0         | H         | 0         | 0         | 0         | 0         | 0         | 0         | 0         | 0          | transcription GO |
| regulation_of_transcription_DNA_depe | CDE.01       | 0.6      | 0           | 0          | 0       | 0        | 0       | 0        | 0         | M         | M         | 0         | M         | 0         | H         |           | M         | M         | M         | 0         | M         | M         | 0         | H         | H          | transcription GO |
| regulation_of_transcription_DNA_depe | E2F.02       | 0.6      | 0           | 0          | 0       | H        | 0       | 0        | 0         | M         | 0         | 0         | 0         | 0         | H         | 0         | 0         | H         | M         |           | 0         | 0         | 0         | 0         |            | transcription GO |
| regulation_of_transcription_DNA_depe | GAGA.01      | 0.6      |             | H          | 0       | 0        | H       | H        | 0         | 0         | 0         | H         | 0         | M         | H         | H         | M         | 0         | 0         | 0         | 0         | H         |           | 0         | 0          | transcription GO |
| regulation_of_transcription (266)    | poly_C       | 1        | 0           | 0          | 0       | 0        | 0       | 0        | M         | H         |           |           | 0         | H         | H         | H         | 0         | 0         | 0         | 0         | 0         | 0         | M         | 0         | 0          | transcription GO |
| regulation_of_transcription (266)    | WT1.01       | 0.8      | 0           | 0          | 0       | 0        | 0       | 0        | 0         | H         | M         |           | 0         | 0         | H         | M         | 0         | 0         | 0         | 0         | 0         | 0         | 0         | 0         | 0          | transcription GO |
| regulation_of_transcription (266)    | ZF5.01       | 0.7      | 0           | 0          | 0       | 0        | 0       | 0        | H         | M         |           | 0         | 0         | 0         | 0         | 0         | 0         | 0         | 0         | 0         | 0         | 0         | 0         | 0         | 0          | transcription GO |
| regulation_of_transcription (266)    | ZBP89.01     | 0.7      | 0           | 0          | 0       | 0        | 0       | 0        | H         |           | 0         | 0         | 0         | 0         | H         | 0         | 0         | 0         | 0         | 0         | 0         | 0         | 0         | 0         | 0          | transcription GO |
| regulation_of_transcription (266)    | CKROX_01     | 0.7      | 0           | 0          | 0       | 0        | M       | M        | 0         | 0         | H         |           | 0         | 0         | H         | M         | M         | 0         | 0         | 0         | 0         | 0         | 0         | 0         | 0          | transcription GO |
| regulation_of_transcription (266)    | EGR1.02      | 0.7      | 0           | 0          | 0       | 0        | 0       | 0        |           | H         | M         | 0         | 0         | 0         | H         | 0         | 0         | 0         | 0         | 0         | 0         | 0         | 0         | 0         | 0          | transcription GO |
| digestion (51)                       | HFH8.01      | 0.3      | H           | 0          | 0       | 0        |         | 0        | 0         | 0         | 0         | 0         | 0         | 0         | 0         | 0         | 0         | 0         | 0         | 0         | 0         | 0         | 0         | 0         | 0          | transcription GO |
| development (530)                    | poly_C       | 1        | 0           | 0          | M       | 0        | H       |          |           |           | H         | H         | H         | H         | 0         | 0         | H         | 0         | 0         | 0         | 0         | M         | 0         | M         |            | transcription GO |
| development (530)                    | WT1.01       | 0.8      | H           | 0          | 0       | 0        | 0       | H        | 0         | 0         |           | H         | 0         | H         | 0         | 0         | 0         |           | 0         | 0         | H         | M         | 0         | H         | 0          | transcription GO |
| development (530)                    | MAZR.01      | 0.8      | 0           | 0          | 0       | 0        | 0       | 0        | H         |           | H         | H         | M         |           | H         | H         |           | 0         | 0         | 0         | H         | H         | 0         | H         | H          | transcription GO |
| development (530)                    | ZNF202.01    | 0.7      | 0           | 0          | 0       | 0        | H       | H        |           | H         | H         | H         | 0         | H         | H         | 0         | 0         | 0         | 0         | 0         | 0         | M         | 0         | 0         | 0          | transcription GO |
| development (530)                    | ZBP89.01     | 0.7      | 0           | 0          | 0       | 0        | H       | H        |           | H         | H         | H         | 0         | H         | H         | 0         | M         | 0         | 0         | H         | H         | 0         | M         | 0         | 0          | transcription GO |
| development (530)                    | CKROX_01     | 0.7      | 0           | 0          | 0       | 0        | H       | H        | H         |           | H         | H         | M         | H         | H         | 0         | 0         | 0         | 0         |           | 0         | 0         | 0         | 0         | 0          | transcription GO |
| development (530)                    | MZF1.01      | 0.7      | 0           | 0          | 0       | 0        | H       | 0        | H         | 0         | 0         | H         | H         |           | M         | H         | H         | 0         | H         | H         | 0         | 0         | 0         | H         | 0          | transcription GO |

[illegible]

[illegible]

[illegible]

[illegible]
